# Supplementary material for: Domino N-/C- or N-/N-/C-arylation of imidazoles to yield polyaryl imidazolium salts via atom-economical use of diaryliodonium salts
Source: Royal Society of Chemistry journal article supplement (doi:10.1039/c9cc05237b), 2019-01-01

## Supporting Information

### **Domino *N*-/*C*- or *N*-/*N*-/*C*-Arylation of Imidazoles to Yield Polyaryl Imidazolium Salts via Atom-Economical Use of Diaryliodonium Salts**

*Shiqing Li,\* Hongxu Lv, Yu Yu, Xiuqing Ye, Baisong Li, Songming Yang, Yanru Mo and Xiangfei Kong\**

*Guangxi Key Laboratory of Electrochemical and Magneto-Chemical Function Material, College of Chemistry and Bioengineering, Guilin University of Technology, Guilin 541004, P. R. China.*

*E-mail: [lisq@glut.edu.cn](mailto:lisq@glut.edu.cn); [xiangfei.kong@glut.edu.cn](mailto:xiangfei.kong@glut.edu.cn)*

#### **Table of contents**

|                                                                                            |     |
|--------------------------------------------------------------------------------------------|-----|
| I. General remarks .....                                                                   | S1  |
| II. General procedure A for the domino diarylation.....                                    | S2  |
| III. General procedure B for the domino triarylation .....                                 | S2  |
| IV. Selectivity of <i>N</i> -quaternization with unsymmetrical iodonium salts .....        | S3  |
| V. Selectivity of triarylation reaction with <b>6a</b> , <b>2a-OTf</b> and <b>2l</b> ..... | S4  |
| VI. AE values in the diarylation reaction .....                                            | S4  |
| VII. Proposed mechanism of the di-/triarylation.....                                       | S5  |
| VIII. Experimental data for the described substances .....                                 | S5  |
| IX. References .....                                                                       | S19 |
| X. Copies of <sup>1</sup> H, <sup>13</sup> C and <sup>19</sup> F NMR spectra .....         | S20 |

## I. General remarks

NMR spectra were obtained on a BRUKER Ascend400 and Ascend500. The  $^1\text{H}$  NMR (400 and 500 MHz) chemical shifts were measured relative to  $\text{CDCl}_3$  or  $\text{DMSO-}d_6$  as the internal reference ( $\text{CDCl}_3$ :  $\delta = 7.26$  ppm;  $\text{DMSO-}d_6$ :  $\delta = 2.50$  ppm). The  $^{13}\text{C}$  NMR (101 and 126MHz) chemical shifts were given using  $\text{CDCl}_3$  or  $\text{DMSO-}d_6$  the internal standard ( $\text{CDCl}_3$ :  $\delta = 77.16$  ppm;  $\text{DMSO-}d_6$ :  $\delta = 39.52$  ppm). High-resolution mass spectra (HR-MS) were obtained with a BRUKER solanX 70 FT-MS (ESI $^+$ ). Melting points were determined with SGW $^{\text{®}}$  X-4 and are uncorrected.

Unless otherwise noted, all reagents were obtained from commercial suppliers and used without further purification. Azoles **6a-d**, N-methyl imidazole **1q** and  $\text{Cu}_2\text{O}$  (purity of 99%) were purchased from Beijing Innochem Chemical Engineering Reagent (China) Co., Ltd. Boron trifluoride diethyl etherate, *m*-CPBA (purity of 75%), triflic acid, sodium tetrafluoroborate, uracil, aryl iodides and arylboronic acids were purchased from Adamas-beta Ltd. The N-aryl(benzo)imidazoles **1a-p**,<sup>[1]</sup> 1-phenyl-1,2,4-triazole **1s**,<sup>[2]</sup> 1,4,5-triphenylimidazole **1t**,<sup>[3]</sup> diaryliodonium tetrafluoroborate **2a-g**,<sup>[4]</sup> bis(4-methoxyphenyl)iodonium tosylates **2f-OTs**,<sup>[5]</sup> (2-tolyl)-(4-methoxyphenyl) iodonium triflate **2h** and (phenyl)(mesityl) iodonium triflate **2l**,<sup>[6]</sup> aryl-uracil iodonium triflate **2i** and **2j**,<sup>[7]</sup> styryl-phenyl iodonium triflate **2k**,<sup>[8]</sup> 4,5-bisaryl-1*H*-imidazole **6e** and **6f**<sup>[9]</sup> and 1*H*-phenanthro[9,10-*d*]imidazole **6g**<sup>[10]</sup> were prepared according to the literature procedures.

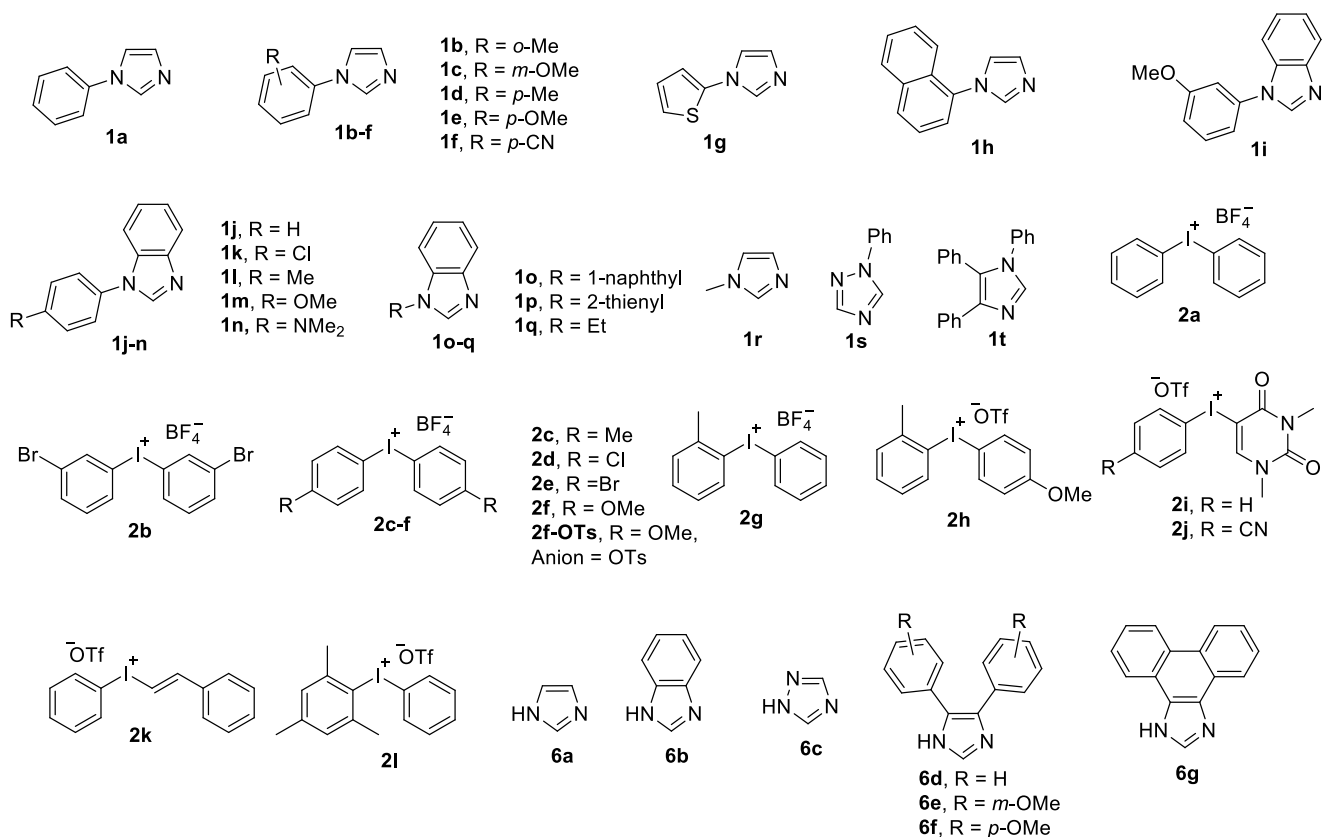

## II. General procedure A for the domino diarylation

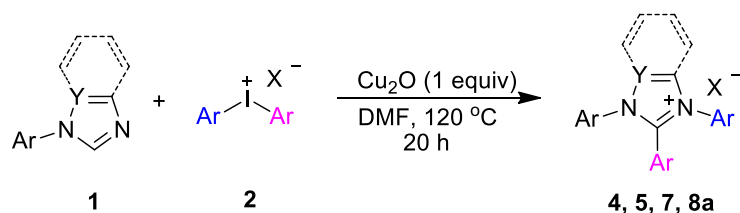

To a dry Schlenck tube containing a magnetic stir bar was added an *N*-aryl azole **1** (0.2 mmol, 1.0 equiv), diaryliodonium salt **2** (0.2 mmol, 1 equiv), Cu<sub>2</sub>O (28 mg, 1.0 equiv) and DMF (1 mL). The mixture was stirred at 120 °C for 20 h under an N<sub>2</sub> atmosphere. The mixture was cooled down to room temperature before DMF was removed under reduced pressure. The residue was purified by a silica (100-200 meshes) gel column (dichloromethane/methanol = 100/1→30/1, v/v) to afford products **4**, **5**, **7** and **8a**.

**Table S1.** Screening of the catalyst and reaction time<sup>a</sup>

| Entry | Metal/mol%                | Time/h | Yield <sup>b</sup><br><b>3a:4a</b> |
|-------|---------------------------|--------|------------------------------------|
| 1     | Cu <sub>2</sub> O/10      | 20     | 90:trace                           |
| 2     | Cu <sub>2</sub> O/20      | 20     | 62:18                              |
| 3     | Cu <sub>2</sub> O/50      | 20     | 35:44                              |
| 4     | Cu <sub>2</sub> O/70      | 20     | 10:66                              |
| 5     | Cu <sub>2</sub> O/100     | 2      | 81:trace                           |
| 6     | Cu <sub>2</sub> O/100     | 5      | 59:23                              |
| 7     | Cu <sub>2</sub> O/100     | 10     | 43:41                              |
| 8     | Cu <sub>2</sub> O/100     | 15     | 15:65                              |
| 9     | Cu <sub>2</sub> O/100     | 18     | 8:72                               |
| 10    | Pd(OAc) <sub>2</sub> /10  | 20     | n.d. : n.d.                        |
| 11    | Pd(OAc) <sub>2</sub> /100 | 20     | n.d. : n.d.                        |
| 12    | PdCl <sub>2</sub> /10     | 20     | 8 : n.d.                           |
| 13    | PdCl <sub>2</sub> /100    | 20     | n.d. : n.d.                        |
| 14    | Ag <sub>2</sub> O/10      | 20     | 10 : n.d.                          |
| 15    | Ag <sub>2</sub> O/10      | 20     | n.d. : n.d.                        |

<sup>a</sup> Reaction conditions: **1a** (0.2 mmol), **2a** (0.24 mmol) and catalyst (x mol%) in DMF (1 mL) at 120 °C for y hours under a N<sub>2</sub> atmosphere. <sup>b</sup> Isolated yield. n.d. = not detected.

## III. General procedure B for the domino triarylation

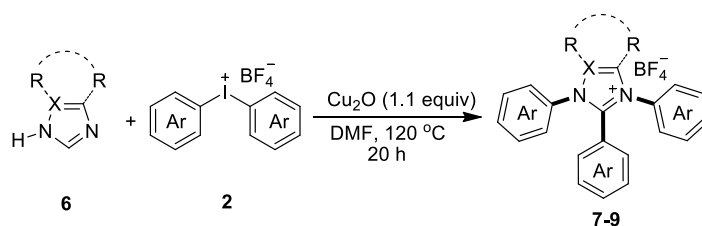

To a dry Schlenck tube containing a magnetic stir bar was added an azole **6** (0.2 mmol, 1.0 equiv), diaryliodonium salt **2** (0.4 mmol, 2 equiv), Cu<sub>2</sub>O (31 mg, 1.1 equiv) and DMF (1.5 mL). The mixture was stirred at 120 °C for 20 h under an N<sub>2</sub> atmosphere. The mixture was cooled down to room

temperature before DMF was removed under reduced pressure. The residue was purified by a silica (100-200 meshes) gel column, eluting with dichloromethane/methanol (100/1→50/1, v/v) or dichloromethane/ethyl acetate (10/1→1/1, v/v) to afford corresponding products.

#### IV. Selectivity of *N*-quaternization with unsymmetrical iodonium salts

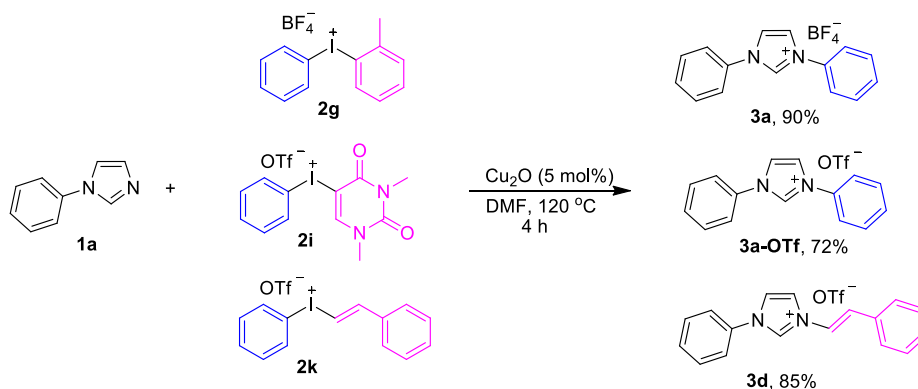

To a dry Schlenk tube with a magnetic stir bar was added an *N*-phenyl imidazole **1a** (0.2 mmol, 1.0 equiv), diaryliodonium salt **2g/2i/2k** (0.2 mmol, 1 equiv),  $\text{Cu}_2\text{O}$  (1.4 mg, 5 mol%) and DMF (1 mL). The mixture was stirred at 120 °C for 4 h under an  $\text{N}_2$  atmosphere and cooled down before DMF was removed under reduced pressure. The residue was purified by a silica (100-200 meshes) gel column (dichloromethane/methanol = 50/1→20/1, v/v) to afford product **3a/3a-OTf/3d**.

##### 1,3-Diphenyl-1*H*-imidazol-3-ium Tetrafluoroborate (**3a**)

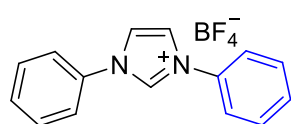

A white solid (56 mg, 90% yield).  $^1\text{H}$  NMR (400 MHz,  $\text{DMSO}-d_6$ ):  $\delta$  = 10.34 (s, 1H), 8.58 (s, 2H), 7.92 (d,  $J$  = 7.6 Hz, 4H), 7.72 (t,  $J$  = 7.6 Hz, 4H), 7.64 (t,  $J$  = 7.2 Hz, 2H) ppm. The result was in accordance with the literature.<sup>[11]</sup>

##### 1,3-Diphenyl-1*H*-imidazol-3-ium Trifluoromethanesulfonate (**3a-OTf**)

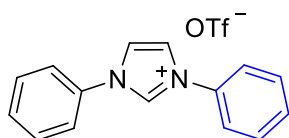

A white solid (53 mg, 72% yield).  $^1\text{H}$  NMR (500 MHz,  $\text{DMSO}-d_6$ ):  $\delta$  = 10.34 (s, 1H), 8.58 (s, 2H), 7.93 (d,  $J$  = 7.5 Hz, 4H), 7.72 (t,  $J$  = 7.5 Hz, 4H), 7.64 (t,  $J$  = 7.0 Hz, 2H) ppm.  $^{13}\text{C}$  NMR (126 MHz,  $\text{DMSO}-d_6$ ):  $\delta$  = 135.2, 135.0, 130.6, 130.5, 122.6, 122.4 ppm. The result was in accordance with the literature.<sup>[11]</sup>

##### (*E*)-1-Phenyl-3-styryl-1*H*-imidazol-3-ium Trifluoromethanesulfonate (**3d**)

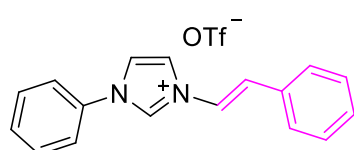

A gray solid (50 mg, 85% yield).  $^1\text{H}$  NMR (400 MHz,  $\text{DMSO}-d_6$ ):  $\delta$  = 10.12 (s, 1H), 8.48 (s, 1H), 8.42 (s, 1H), 7.93 (d,  $J$  = 14.4 Hz, 1H), 7.85 (d,  $J$  = 7.6 Hz, 2H), 7.71 (t,  $J$  = 7.6 Hz, 2H), 7.65–7.60 (m, 3H), 7.56 (d,  $J$  = 14.8 Hz, 1H), 7.49 (t,  $J$  = 7.6 Hz, 2H), 7.42 (t,  $J$  = 7.6 Hz, 1H) ppm.  $^{13}\text{C}$  NMR (101 MHz,  $\text{DMSO}-d_6$ ):  $\delta$  = 134.6, 134.1, 132.9, 130.2, 130.0, 129.3, 129.2, 126.9, 125.1, 122.0, 121.92, 121.88, 120.8 ppm. HRMS (ESI)  $m/z$ : calcd for  $\text{C}_{17}\text{H}_{15}\text{N}_2^+$  ( $[\text{M}-\text{OTf}]^+$ ) 247.1235, found 247.1233.

## V. Selectivity of triarylation reaction with **6a**, **2a-OTf** and **2l**

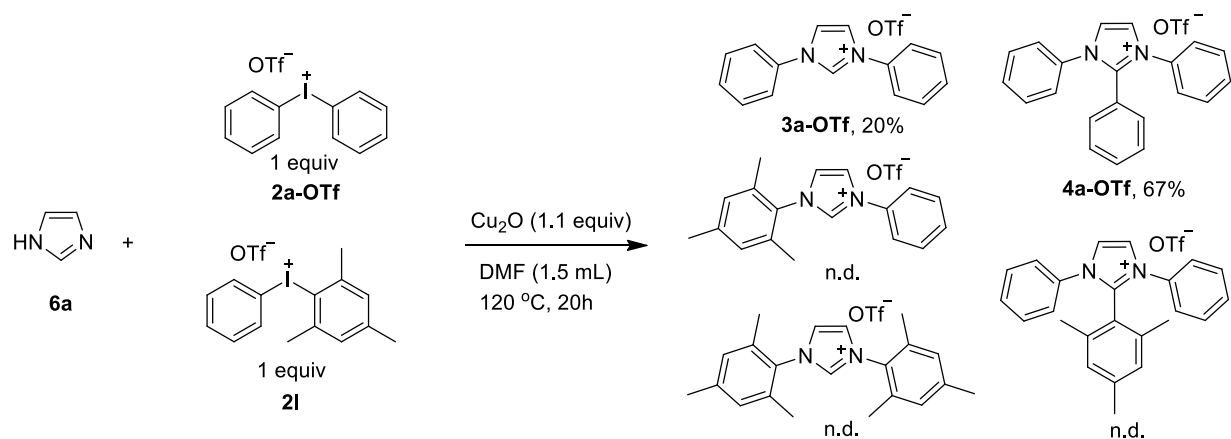

**Scheme S1.** The reaction of **6a** with two different iodonium salts (**2a-OTf** and **2l**). n.d. = not detected.

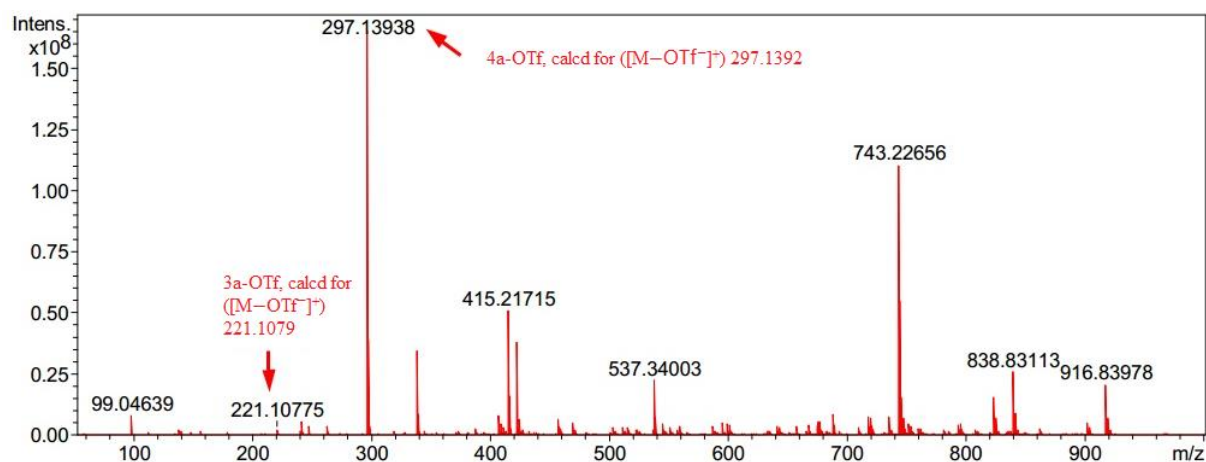

**Figure S1.** HRMS spectrum of the reaction mixture of **6a**, **2a-OTf** and **2l** after filtering through a celite pad.

## VI. AE values in the diarylation reaction

**Table S2.** AE values of the compounds for diarylation<sup>a,b</sup>.

| Compound      | AE/% | Compound  | AE/% | Compound  | AE/% | Compound   | AE/%            |
|---------------|------|-----------|------|-----------|------|------------|-----------------|
| <b>4a</b>     | 65   | <b>4h</b> | 48   | <b>4p</b> | 67   | <b>5h</b>  | 52              |
| <b>4a-OTf</b> | 61   | <b>4i</b> | 58   | <b>5a</b> | 41   | <b>5i</b>  | 48              |
| <b>4b</b>     | 61   | <b>4j</b> | 66   | <b>5b</b> | 46   | <b>5j</b>  | 36              |
| <b>4c</b>     | 55   | <b>4k</b> | 62   | <b>5c</b> | 60   | <b>5k</b>  | 26              |
| <b>4d</b>     | 62   | <b>4l</b> | 55   | <b>5d</b> | 52   | <b>5k'</b> | 47              |
| <b>4e</b>     | 65   | <b>4m</b> | 58   | <b>5e</b> | 46   | <b>5l</b>  | 56              |
| <b>4f</b>     | 43   | <b>4n</b> | 45   | <b>5f</b> | 52   | <b>7d</b>  | 31 <sup>b</sup> |
| <b>4g</b>     | 49   | <b>4o</b> | 51   | <b>5g</b> | 47   | <b>8a</b>  | 62 <sup>b</sup> |

<sup>a</sup> The calculation formula of AE:

$$\text{AE} = \frac{\text{molecular mass of the desired reaction product}}{\text{molecular mass of all reactants}} \times 100\%$$

<sup>b</sup> The AE values of **7d** and **8a** are calculated based on the diarylation.

## VII. Proposed mechanism of the di-/triarylation

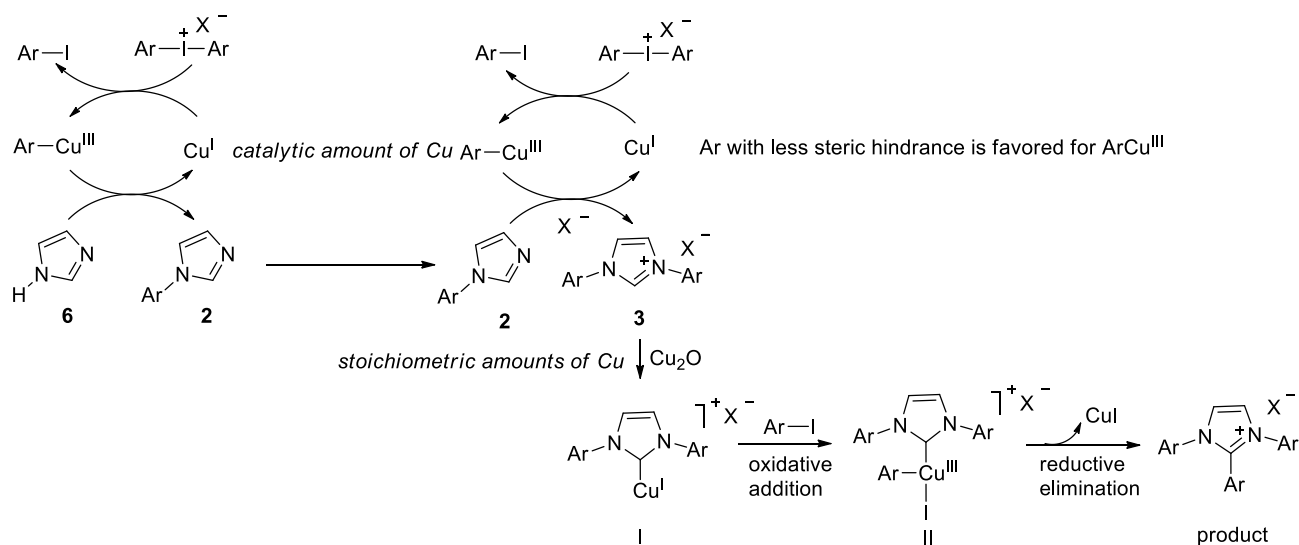

Figure S2. Proposed mechanism.

## VIII. Experimental data for the described substances

### 1,2,3-Triphenyl-1*H*-imidazol-3-ium Tetrafluoroborate (**4a** or **7a**)<sup>[12]</sup>

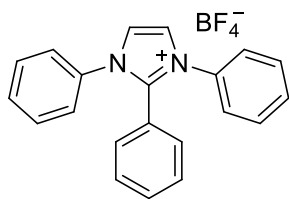

Following the general procedure A, 1-phenylimidazole **1a** (28.8 mg, 0.2 mmol) and diphenyliodonium tetrafluoroborate **2a** (73.6 mg, 0.2 mmol) were used. Purification via a silica (100-200 meshes) gel column ( $\text{CH}_2\text{Cl}_2/\text{MeOH} = 100/1 \rightarrow 30/1$ , v/v) afforded **4a** as a white solid (66 mg, 86% yield, AE = 65%).

Following the general procedure B, the reaction of imidazole **6a** (13.6 mg, 0.2 mmol) and diphenyliodonium tetrafluoroborate **2a** (147.2 mg, 0.4 mmol) afforded **7a** as a white solid (55 mg, 71%). <sup>1</sup>H NMR (400 MHz,  $\text{DMSO}-d_6$ ):  $\delta = 8.42$  (s, 2H), 7.54–7.48 (m, 10H), 7.43–7.40 (m, 3H), 7.33 (t,  $J = 7.6$  Hz, 2H) ppm. <sup>13</sup>C NMR (101 MHz,  $\text{DMSO}-d_6$ ):  $\delta = 144.5$ , 135.0, 131.8, 131.2, 130.3, 129.7, 128.6, 126.4, 124.0, 121.6 ppm. <sup>19</sup>F NMR (376 MHz,  $\text{DMSO}-d_6$ ):  $\delta = -148.27$  (s),  $-148.32$  (s) ppm.

### 1,2,3-Triphenyl-1*H*-imidazol-3-ium Trifluoromethanesulfonate (**4a-OTf**)

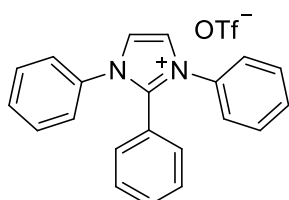

Following the general procedure A, 1-phenylimidazole **1a** (28.8 mg, 0.2 mmol) and diphenyliodonium triflate **2a-OTf** (86.0 mg, 0.2 mmol) were used. Purification via a silica (100-200 meshes) gel column ( $\text{CH}_2\text{Cl}_2/\text{MeOH} = 100/1 \rightarrow 30/1$ , v/v) afforded **4a-OTf** as a white solid (71 mg, 80% yield, AE = 61%). M.p.:  $> 240$  °C. <sup>1</sup>H NMR (400 MHz,  $\text{DMSO}-d_6$ ):  $\delta = 8.42$  (s, 2H), 7.52 (br, 10H), 7.43–7.41 (m, 3H), 7.33 (t,  $J = 7.6$  Hz, 2H) ppm. <sup>13</sup>C NMR (101 MHz,  $\text{DMSO}-d_6$ ):  $\delta = 144.5$ , 135.0, 131.7, 131.2, 130.3, 129.6, 128.5, 126.3, 124.0, 121.5 ppm. <sup>19</sup>F NMR (376 MHz,  $\text{DMSO}-d_6$ ):  $\delta = -77.75$  (s) ppm. HRMS (ESI)  $m/z$ : calcd for  $\text{C}_{21}\text{H}_{17}\text{N}_2^+$  ( $[\text{M}-\text{OTf}]^+$ ) 297.1392, found 297.1394.

### 2,3-Diphenyl-1-(*o*-tolyl)-1*H*-imidazol-3-ium Tetrafluoroborate (**4b**)

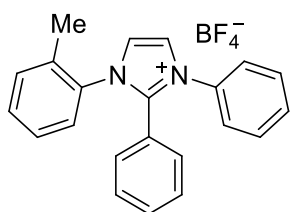

Following the general procedure A, 1-(*o*-tolyl)-1*H*-imidazole **1b** (31.6 mg, 0.2 mmol) and diphenyliodonium tetrafluoroborate **2a** (73.6 mg, 0.2 mmol) were used. Purification via a silica (100-200 meshes) gel column (CH<sub>2</sub>Cl<sub>2</sub>/MeOH = 100/1→30/1, v/v) afforded **4b** as a white solid (64 mg, 80% yield, AE = 61%).

M.p.: 193–195 °C. <sup>1</sup>H NMR (400 MHz, CDCl<sub>3</sub>): δ = 7.77 (s, 1H), 7.71 (d, *J* = 7.6 Hz, 1H), 7.58 (s, 1H), 7.52 (d, *J* = 7.6 Hz, 2H), 7.43–7.33 (m, 5H), 7.29–7.27 (m, 1H), 7.24–7.21 (m, 5H), 2.07 (s, 3H) ppm. <sup>13</sup>C NMR (101 MHz, CDCl<sub>3</sub>): δ = 144.8, 135.1, 134.2, 133.9, 132.1, 131.5, 131.2, 130.8, 130.5, 130.1, 129.1, 128.5, 127.8, 126.4, 124.5, 124.3, 121.2, 17.6 ppm. HRMS (ESI) *m/z*: calcd for C<sub>22</sub>H<sub>19</sub>N<sub>2</sub><sup>+</sup> ([M–BF<sub>4</sub><sup>–</sup>]<sup>+</sup>) 311.1548, found 311.1550.

### 1-(3-Methoxyphenyl)-2,3-diphenyl-1*H*-imidazol-3-ium Tetrafluoroborate (**4c**)

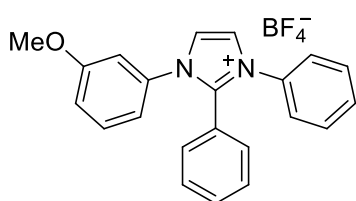

Following the general procedure A, 1-(3-methoxyphenyl)-1*H*-imidazole **1c** (34.8 mg, 0.2 mmol) and diphenyliodonium tetrafluoroborate **2a** (73.6 mg, 0.2 mmol) were used. Purification via a silica (100-200 meshes) gel column (CH<sub>2</sub>Cl<sub>2</sub>/MeOH = 100/1→30/1, v/v) afforded **4c** as a white solid

(60 mg, 72% yield, AE = 55%). M.p.: 192–194 °C. <sup>1</sup>H NMR (400 MHz, CDCl<sub>3</sub>): δ = 7.68 (s, 1H), 7.66 (s, 1H), 7.46 (d, *J* = 7.2 Hz, 2H), 7.43–7.35 (m, 4H), 7.30 (d, *J* = 7.2 Hz, 2H), 7.26–7.21 (m, 3H), 7.13 (s, 1H), 6.95–6.92 (m, 2H), 3.72 (s, 3H) ppm. <sup>13</sup>C NMR (101 MHz, CDCl<sub>3</sub>): δ = 160.7, 144.7, 136.0, 135.1, 133.7, 132.0, 131.2, 130.6, 130.0, 129.1, 126.5, 124.2, 124.1, 121.3, 118.1, 117.5, 111.7, 55.9 ppm. HRMS (ESI) *m/z*: calcd for C<sub>22</sub>H<sub>19</sub>N<sub>2</sub>O<sup>+</sup> ([M–BF<sub>4</sub><sup>–</sup>]<sup>+</sup>) 327.1497, found 327.1502.

### 2,3-Diphenyl-1-(*p*-tolyl)-1*H*-imidazol-3-ium Tetrafluoroborate (**4d**)

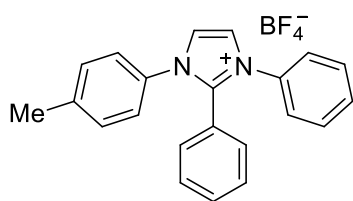

Following the general procedure A, 1-(*p*-tolyl)-1*H*-imidazole **1d** (31.6 mg, 0.2 mmol) and diphenyliodonium tetrafluoroborate **2a** (73.6 mg, 0.2 mmol) were used. Purification via a silica (100-200 meshes) gel column (CH<sub>2</sub>Cl<sub>2</sub>/MeOH = 100/1→30/1, v/v) afforded **4d** a white solid

(65 mg, 81% yield, AE = 62%). M.p.: 234–236 °C. <sup>1</sup>H NMR (400 MHz, CDCl<sub>3</sub>): δ = 7.65 (s, 1H), 7.64 (s, 1H), 7.45 (d, *J* = 6.8 Hz, 2H), 7.41–7.32 (m, 6H), 7.28–7.21 (m, 4H), 7.15 (d, *J* = 8.0 Hz, 2H), 2.33 (s, 3H) ppm. <sup>13</sup>C NMR (101 MHz, CDCl<sub>3</sub>): δ = 144.5, 140.9, 135.1, 132.6, 132.0, 131.2, 130.6, 130.5, 130.0, 129.1, 126.5, 126.2, 124.3, 124.1, 121.3, 21.3 ppm. HRMS (ESI) *m/z*: calcd for C<sub>22</sub>H<sub>19</sub>N<sub>2</sub><sup>+</sup> ([M–BF<sub>4</sub><sup>–</sup>]<sup>+</sup>) 311.1548, found 311.1554.

### 1-(4-Methoxyphenyl)-2,3-diphenyl-1*H*-imidazol-3-ium Tetrafluoroborate (**4e**)

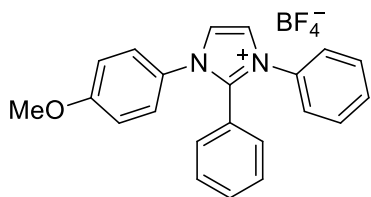

Following the general procedure A, 1-(4-methoxyphenyl)-1*H*-imidazole **1e** (34.8 mg, 0.2 mmol) and diphenyliodonium tetrafluoroborate **2a** (73.6 mg, 0.2 mmol) were used. Purification via a silica (100-200 meshes) gel column (CH<sub>2</sub>Cl<sub>2</sub>/MeOH = 100/1→30/1, v/v) afforded **4e** as a gray solid (73 mg, 88% yield, AE = 65%). M.p.: 170–172 °C. <sup>1</sup>H NMR (400 MHz, CDCl<sub>3</sub>): δ = 7.64 (d, *J* = 1.6 Hz, 2H), 7.47–7.45 (m, 2H), 7.43–7.36 (m, 6H), 7.27–7.25 (m, 4H), 6.86 (d, *J* = 9.2 Hz, 2H), 3.78 (s, 3H) ppm. <sup>13</sup>C NMR (101 MHz, CDCl<sub>3</sub>): δ = 160.9, 144.8, 135.2, 132.0, 131.3, 130.6, 130.1, 129.1, 127.8, 127.7, 126.5, 124.5, 124.0, 121.4, 115.1, 55.7 ppm. HRMS (ESI) *m/z*: calcd for C<sub>22</sub>H<sub>19</sub>N<sub>2</sub>O<sup>+</sup> ([M–BF<sub>4</sub><sup>–</sup>]<sup>+</sup>) 327.1497, found 327.1505.

### 1-(4-Cyanophenyl)-2,3-diphenyl-1*H*-imidazol-3-ium Tetrafluoroborate (**4f**)

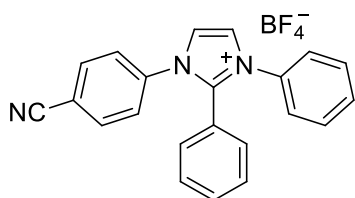

Following the general procedure A, 4-(1*H*-imidazol-1-yl)benzonitrile **1f** (33.8 mg, 0.2 mmol) and diphenyliodonium tetrafluoroborate **2a** (73.6 mg, 0.2 mmol) were used. Purification via a silica (100-200 meshes) gel column (CH<sub>2</sub>Cl<sub>2</sub>/MeOH = 100/1→30/1, v/v) afforded **4f** as a yellow solid (46 mg, 56% yield, AE = 43%). M.p.: 203–205 °C. <sup>1</sup>H NMR (400 MHz, CDCl<sub>3</sub>): δ = 7.83 (d, *J* = 2.0 Hz, 1H), 7.74 (d, *J* = 8.8 Hz, 2H), 7.69–7.65 (m, 3H), 7.51 (d, *J* = 7.6 Hz, 2H), 7.47–7.36 (m, 6H), 7.29–7.25 (m, 2H) ppm. <sup>13</sup>C NMR (101 MHz, CDCl<sub>3</sub>): δ = 144.9, 138.5, 134.8, 133.8, 132.5, 131.4, 130.9, 130.1, 129.3, 127.9, 126.5, 124.7, 124.0, 120.7, 117.3, 114.7 ppm. HRMS (ESI) *m/z*: calcd for C<sub>22</sub>H<sub>16</sub>N<sub>3</sub><sup>+</sup> ([M–BF<sub>4</sub><sup>–</sup>]<sup>+</sup>) 322.1344, found 322.1345.

### 1-(Naphthalen-1-yl)-2,3-diphenyl-1*H*-imidazol-3-ium Tetrafluoroborate (**4g**)

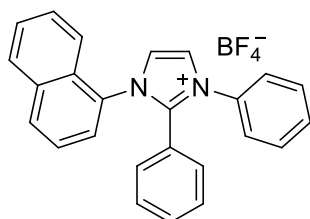

Following the general procedure A, 1-(naphthalen-1-yl)-1*H*-imidazole **1h** (38.8 mg, 0.2 mmol) and diphenyliodonium tetrafluoroborate **2a** (73.6 mg, 0.2 mmol) were used. Purification via a silica (100-200 meshes) gel column (CH<sub>2</sub>Cl<sub>2</sub>/MeOH = 100/1→30/1, v/v) afforded **4g** as a white solid (55 mg, 63% yield, AE = 49%). M.p.: > 240 °C. <sup>1</sup>H NMR (500 MHz, DMSO-*d*<sub>6</sub>): δ = 8.56 (d, *J* = 2.0 Hz, 1H), 8.48 (d, *J* = 2.0 Hz, 1H), 8.16 (d, *J* = 8.5 Hz, 1H), 8.09–8.07 (m, 1H), 7.93 (d, *J* = 7.5 Hz, 1H), 7.89 (d, *J* = 7.5 Hz, 1H), 7.70–7.64 (m, 5H), 7.58–7.54 (m, 3H), 7.38 (d, *J* = 7.5 Hz, 2H), 7.30 (t, *J* = 7.5 Hz, 1H), 7.20 (t, *J* = 7.5 Hz, 2H) ppm. <sup>13</sup>C NMR (126 MHz, DMSO-*d*<sub>6</sub>): δ = 145.4, 135.1, 133.4, 131.8, 131.2, 131.0, 130.6, 130.3, 129.6, 128.4, 128.4, 128.3, 128.3, 127.4, 126.6, 126.4, 125.3, 125.0, 124.4, 122.0, 121.5 ppm. HRMS (ESI) *m/z*: calcd for C<sub>25</sub>H<sub>19</sub>N<sub>2</sub><sup>+</sup> ([M–BF<sub>4</sub><sup>–</sup>]<sup>+</sup>) 347.1548, found 347.1557.



### 1-(3-Methoxyphenyl)-2,3-diphenyl-1*H*-benzo[d]imidazol-3-ium Tetrafluoroborate (**4h**)

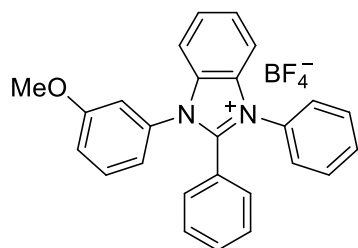

Following the general procedure A, 1-(3-methoxyphenyl)-1*H*-benzo[d]imidazole **1i** (44.9 mg, 0.2 mmol) and diphenyliodonium tetrafluoroborate **2a** (73.6 mg, 0.2 mmol) were used. Purification via a silica (100-200 meshes) gel column (CH<sub>2</sub>Cl<sub>2</sub>/MeOH = 100/1→50/1, v/v) afforded **4h** as a pale yellow solid (57 mg, 61% yield, AE = 48%). M.p.: 217–219 °C. <sup>1</sup>H NMR (500 MHz, CDCl<sub>3</sub>): δ = 7.63 (br, 1H), 7.58–7.53 (m, 2H), 7.47–7.39 (m, 7H), 7.35–7.30 (m, 3H), 7.21–7.18 (m, 3H), 7.09 (d, *J* = 8.0 Hz, 1H), 6.99 (dd, *J* = 8.0 Hz, 2.0 Hz, 1H), 3.70 (s, 3H). <sup>13</sup>C NMR (126 MHz, CDCl<sub>3</sub>): δ = 161.1, 150.2, 133.7, 133.0, 132.8, 132.5, 131.6, 131.0, 130.8, 130.4, 129.0, 128.03, 128.00, 121.1, 119.4, 118.0, 113.8, 113.7, 113.0, 56.2 ppm. HRMS (ESI) *m/z*: calcd for C<sub>26</sub>H<sub>21</sub>N<sub>2</sub>O<sup>+</sup> ([M-BF<sub>4</sub><sup>-</sup>]<sup>+</sup>) 377.1654, found 377.1611.

### 1,2,3-Triphenyl-1*H*-benzo[d]imidazol-3-ium Tetrafluoroborate (**4i** or **7c**)

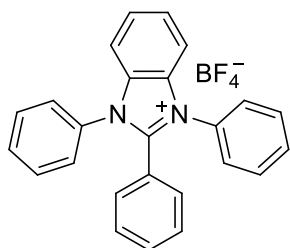

Following the general procedure A, 1-phenylbenzimidazole **1j** (38.8 mg, 0.2 mmol) and diphenyliodonium tetrafluoroborate **2a** (73.6 mg, 0.2 mmol) were used. Purification via a silica (100-200 meshes) gel column (CH<sub>2</sub>Cl<sub>2</sub>/MeOH = 100/1→50/1, v/v) afforded **4i** as a white solid (65 mg, 75% yield, AE = 58%).

Following the general procedure B, the reaction of benzimidazole **6b** (23.6 mg, 0.2 mmol) and diphenyliodonium tetrafluoroborate **2a** (147.2 mg, 0.4 mmol) afforded **7c** as a white solid (45 mg, 52%). M.p.: > 240 °C. <sup>1</sup>H NMR (500 MHz, DMSO-*d*<sub>6</sub>): δ = 7.81–7.79 (m, 2H), 7.65 (br, 12H), 7.55 (d, *J* = 7.5 Hz, 2H), 7.46 (t, *J* = 7.5 Hz, 1H), 7.36 (t, *J* = 7.5 Hz, 2H). <sup>13</sup>C NMR (126 MHz, DMSO-*d*<sub>6</sub>): δ = 150.7, 132.5, 132.3, 131.2, 130.9, 130.3, 128.5, 127.8, 127.5, 121.4, 113.4 ppm. HRMS (ESI) *m/z*: calcd for C<sub>25</sub>H<sub>19</sub>N<sub>2</sub><sup>+</sup> ([M-BF<sub>4</sub><sup>-</sup>]<sup>+</sup>) 347.1548, found 347.1559.

### 1-(4-Chlorophenyl)-2,3-diphenyl-1*H*-benzo[d]imidazol-3-ium Tetrafluoroborate (**4j**)

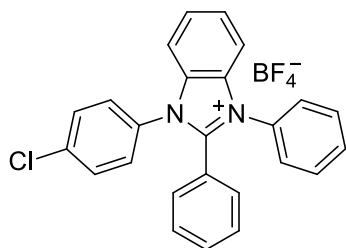

Following the general procedure A, 1-(4-chlorophenyl)-1*H*-benzo[d]imidazole **1k** (45.7 mg, 0.2 mmol) and diphenyliodonium tetrafluoroborate **2a** (73.6 mg, 0.2 mmol) were used. Purification via a silica (100-200 meshes) gel column (CH<sub>2</sub>Cl<sub>2</sub>/MeOH = 100/1→50/1, v/v) afforded **4j** as a white solid (78 mg, 83% yield, AE = 66%). M.p.: > 240 °C. <sup>1</sup>H NMR (500 MHz, CDCl<sub>3</sub>): δ = 7.63–7.58 (m, 6H), 7.53–7.43 (m, 9H), 7.39 (t, *J* = 7.5 Hz, 1H), 7.26–7.23 (m, 2H). <sup>13</sup>C NMR (126 MHz, CDCl<sub>3</sub>): δ = 150.4, 137.2, 133.0, 132.9, 132.7, 132.6, 131.5, 131.3, 131.0, 130.7, 130.4, 129.4, 129.1, 128.1, 128.0, 127.9, 120.9, 113.7, 113.4 ppm. HRMS (ESI) *m/z*: calcd for C<sub>25</sub>H<sub>18</sub>ClN<sub>2</sub><sup>+</sup> ([M-BF<sub>4</sub><sup>-</sup>]<sup>+</sup>) 381.1159, found 381.1168.

### 2,3-Diphenyl-1-(*p*-tolyl)-1*H*-benzo[d]imidazol-3-ium Tetrafluoroborate (**4k**)

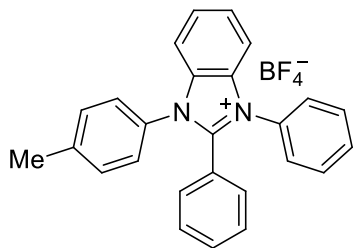

Following the general procedure A, 1-(*p*-tolyl)-1*H*-benzo[d]imidazole **1l** (41.7 mg, 0.2 mmol) and diphenyliodonium tetrafluoroborate **2a** (73.6 mg, 0.2 mmol) were used. Purification via a silica (100-200 meshes) gel column (CH<sub>2</sub>Cl<sub>2</sub>/MeOH = 100/1→50/1, v/v) afforded **4k** as a pale yellow solid (71 mg, 79% yield, AE = 62%). M.p.: > 240 °C. <sup>1</sup>H NMR (400 MHz, CDCl<sub>3</sub>): δ = 7.65–7.63 (m, 2H), 7.61–7.57 (m, 2H), 7.52–7.45 (m, 9H), 7.37 (t, *J* = 7.4 Hz, 1H), 7.28–7.22 (m, 4H), 2.39 (s, 3H). <sup>13</sup>C NMR (101 MHz, CDCl<sub>3</sub>): δ = 150.2, 1413, 133.1, 133.0, 132.8, 132.4, 131.5, 131.0, 130.9, 130.4, 130.1, 129.0, 127.9, 127.6, 121.1, 113.7, 113.6, 21.4 ppm. HRMS (ESI) *m/z*: calcd for C<sub>26</sub>H<sub>21</sub>N<sub>2</sub><sup>+</sup> ([M–BF<sub>4</sub><sup>–</sup>]<sup>+</sup>) 361.1705, found 361.1711.

### 1-(4-Methoxyphenyl)-2,3-diphenyl-1*H*-benzo[d]imidazol-3-ium Tetrafluoroborate (**4l**)

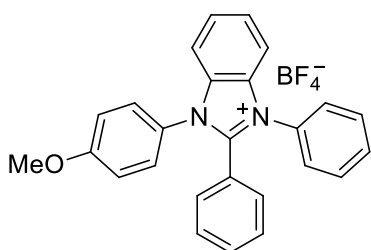

Following the general procedure A, 1-(4-methoxyphenyl)-1*H*-benzo[d]imidazole **1m** (44.9 mg, 0.2 mmol) and diphenyliodonium tetrafluoroborate **2a** (73.6 mg, 0.2 mmol) were used. Purification via a silica (100-200 meshes) gel column (CH<sub>2</sub>Cl<sub>2</sub>/MeOH = 100/1→50/1, v/v) afforded **4l** as a white solid (65 mg, 70% yield, AE = 55%). M.p.: 224–226 °C. <sup>1</sup>H NMR (500 MHz, DMSO-*d*<sub>6</sub>): δ = 7.79–7.77 (m, 2H), 7.67–7.63 (m, 7H), 7.58–7.54 (m, 4H), 7.46 (t, *J* = 7.5 Hz, 1H), 7.37 (t, *J* = 7.5 Hz, 2H), 7.16 (d, *J* = 9.0 Hz, 2H), 3.82 (s, 3H). <sup>13</sup>C NMR (126 MHz, DMSO-*d*<sub>6</sub>): δ = 160.5, 150.9, 132.8, 132.5, 132.4, 132.2, 131.1, 130.9, 130.3, 128.9, 128.6, 127.70, 127.69, 127.5, 124.8, 121.5, 115.3, 113.5, 113.3, 55.6 ppm. HRMS (ESI) *m/z*: calcd for C<sub>26</sub>H<sub>21</sub>N<sub>2</sub>O<sup>+</sup> ([M–BF<sub>4</sub><sup>–</sup>]<sup>+</sup>) 377.1654, found 377.1611.

### 1-(4-(Dimethylamino)phenyl)-2,3-diphenyl-1*H*-benzo[d]imidazol-3-ium Tetrafluoroborate (**4m**)

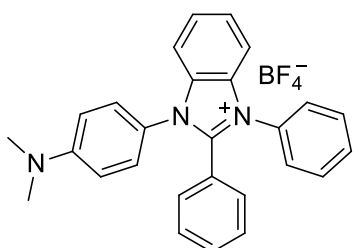

Following the general procedure A, 4-(1*H*-benzo[d]imidazol-1-yl)-*N,N*-dimethylaniline **1n** (47.5 mg, 0.2 mmol) and diphenyliodonium tetrafluoroborate **2a** (73.6 mg, 0.2 mmol) were used. Purification via a silica (100-200 meshes) gel column (CH<sub>2</sub>Cl<sub>2</sub>/MeOH = 100/1→50/1, v/v) afforded **4m** as a yellow solid (70 mg, 74% yield, AE = 58%). M.p.: > 240 °C. <sup>1</sup>H NMR (400 MHz, CDCl<sub>3</sub>): δ = 7.63–7.57 (m, 4H), 7.51–7.49 (m, 4H), 7.47–7.35 (m, 6H), 7.27–7.25 (m, 2H), 6.67 (d, *J* = 8.8 Hz, 2H), 2.98 (s, 6H). <sup>13</sup>C NMR (101 MHz, CDCl<sub>3</sub>): δ = 151.4, 150.3, 133.6, 132.9, 132.8, 132.3, 131.5, 130.8, 130.4, 129.0, 128.3, 127.9, 127.8, 127.7, 121.4, 120.2, 114.0, 113.4, 112.5, 40.3 ppm. HRMS (ESI) *m/z*: calcd for C<sub>27</sub>H<sub>24</sub>N<sub>3</sub><sup>+</sup> ([M–BF<sub>4</sub><sup>–</sup>]<sup>+</sup>) 390.1970, found 390.1981.

### 1-(Naphthalen-1-yl)-2,3-diphenyl-1*H*-benzo[*d*]imidazol-3-ium Tetrafluoroborate (**4n**)

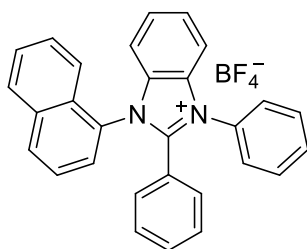

Following the general procedure A, 1-(naphthalen-1-yl)-1*H*-benzo[*d*]imidazole **1o** (48.8 mg, 0.2 mmol) and diphenyliodonium tetrafluoroborate **2a** (73.6 mg, 0.2 mmol) were used. Purification via a silica (100-200 meshes) gel column (CH<sub>2</sub>Cl<sub>2</sub>/MeOH = 100/1→50/1, v/v) afforded **4n** as a white solid (55 mg, 57% yield, AE = 45%). M.p.: 143–145 °C. <sup>1</sup>H NMR (500 MHz, DMSO-*d*<sub>6</sub>): δ = 8.26 (d, *J* = 8.5 Hz, 1H), 8.15 (d, *J* = 8.0 Hz, 1H), 8.01–8.00 (m, 2H), 7.83–7.63 (m, 11H), 7.50 (br, 2H), 7.35 (d, *J* = 8.0 Hz, 2H), 7.25 (t, *J* = 7.5 Hz, 2H) ppm. <sup>13</sup>C NMR (126 MHz, DMSO-*d*<sub>6</sub>): δ = 151.2, 133.7, 133.0, 132.8, 132.6, 132.4, 131.7, 130.9, 130.4, 130.2, 128.7, 128.5, 128.3, 127.9, 127.7, 127.5, 125.8, 122.1, 121.3, 113.7, 113.5 ppm. HRMS (ESI) *m/z*: calcd for C<sub>29</sub>H<sub>21</sub>N<sub>2</sub><sup>+</sup> ([M–BF<sub>4</sub><sup>–</sup>]<sup>+</sup>) 397.1705, found 397.1711.

### 2,3-Diphenyl-1-(thiophen-2-yl)-1*H*-benzo[*d*]imidazol-3-ium Tetrafluoroborate (**4o**)

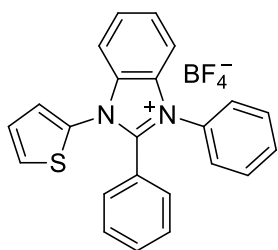

Following the general procedure A, 1-(thiophen-2-yl)-1*H*-benzo[*d*]imidazole **1p** (40.1 mg, 0.2 mmol) and diphenyliodonium tetrafluoroborate **2a** (73.6 mg, 0.2 mmol) were used. Purification via a silica (100-200 meshes) gel column (CH<sub>2</sub>Cl<sub>2</sub>/MeOH = 100/1→50/1, v/v) afforded **4o** as a white solid (58 mg, 66% yield, AE = 51%). M.p.: > 240 °C. <sup>1</sup>H NMR (500 MHz, DMSO-*d*<sub>6</sub>): δ = 7.85–7.76 (m, 4H), 7.65–7.64 (m, 8H), 7.51–7.49 (m, 2H), 7.43–7.40 (m, 2H), 7.20 (t, *J* = 9.5 Hz, 1H) ppm. <sup>13</sup>C NMR (126 MHz, DMSO-*d*<sub>6</sub>): δ = 152.1, 133.3, 132.5, 132.4, 132.3, 131.0, 131.0, 130.8, 130.3, 129.6, 129.4, 128.5, 128.1, 127.9, 127.4, 126.6, 121.2, 113.5, 113.3 ppm. HRMS (ESI) *m/z*: calcd for C<sub>23</sub>H<sub>17</sub>N<sub>2</sub>S<sup>+</sup> ([M–BF<sub>4</sub><sup>–</sup>]<sup>+</sup>) 353.1112, found 353.1120.

### 3-Ethyl-1,2-diphenyl-1*H*-benzo[*d*]imidazol-3-ium Tetrafluoroborate (**4p**)

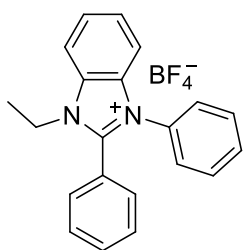

Following the general procedure A, 1-ethyl-1*H*-benzo[*d*]imidazole **1q** (29.2 mg, 0.2 mmol) and diphenyliodonium tetrafluoroborate **2a** (73.6 mg, 0.2 mmol) were used. Purification via a silica (100-200 meshes) gel column (CH<sub>2</sub>Cl<sub>2</sub>/MeOH = 50/1→30/1, v/v) afforded **4p** as a white solid (69 mg, 94% yield, AE = 67%). M.p.: 156–158 °C. <sup>1</sup>H NMR (400 MHz, DMSO-*d*<sub>6</sub>): δ = 8.32 (d, *J* = 8.0 Hz, 1H), 7.84–7.70 (m, 4H), 7.66–7.52 (m, 9H), 4.44 (q, *J* = 7.2 Hz, 2H), 1.44 (t, *J* = 7.2 Hz, 3H) ppm. <sup>13</sup>C NMR (101 MHz, DMSO-*d*<sub>6</sub>): δ = 150.9, 133.2, 133.1, 131.12, 131.07, 130.5, 129.6, 128.1, 127.9, 127.5, 121.9, 114.4, 113.7, 42.1, 14.8 ppm. HRMS (ESI) *m/z*: calcd for C<sub>16</sub>H<sub>15</sub>N<sub>2</sub><sup>+</sup> ([M–BF<sub>4</sub><sup>–</sup>]<sup>+</sup>) 235.1235, found 235.1234.

### 1-Methyl-2,3-diphenyl-1H-imidazol-3-ium Tetrafluoroborate (**4q**)

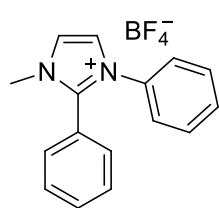

Following the general procedure A, 1-methyl-1H-imidazole **1r** (16.4 mg, 0.2 mmol) and diphenyliodonium tetrafluoroborate **2a** (73.6 mg, 0.2 mmol) were used. Purification via a silica (100-200 meshes) gel column (CH<sub>2</sub>Cl<sub>2</sub>/MeOH = 50/1→30/1, v/v) afforded **4q** as a light yellow semisolid (60 mg, 94% yield, AE = 67%). M.p.: 43–45 °C. <sup>1</sup>H NMR (400 MHz, CDCl<sub>3</sub>): δ = 7.76 (s, 1H), 7.52 (t, *J* = 6.4 Hz, 2H), 7.48–7.42 (m, 4H), 7.40–7.34 (m, 3H), 7.30 (d, *J* = 7.6 Hz, 2H), 3.89 (s, 3H) ppm. <sup>13</sup>C NMR (101 MHz, CDCl<sub>3</sub>): δ = 144.8, 135.1, 132.4, 130.9, 130.40, 130.039, 129.6, 126.1, 124.6, 123.2, 121.2, 36.5 ppm. HRMS (ESI) *m/z*: calcd for C<sub>16</sub>H<sub>15</sub>N<sub>2</sub><sup>+</sup> ([M–BF<sub>4</sub><sup>–</sup>]<sup>+</sup>) 235.1235, found 235.1234.

### 2,3-Bis(3-Bromophenyl)-1-phenyl-1H-imidazol-3-ium Tetrafluoroborate (**5a**)

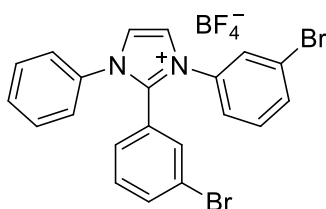

Following the general procedure A, 1-phenylimidazole **1a** (28.8 mg, 0.2 mmol) and bis(3-bromophenyl)iodonium tetrafluoroborate **2b** (105.1 mg, 0.2 mmol) were used. Purification via a silica (100-200 meshes) gel column (CH<sub>2</sub>Cl<sub>2</sub>/MeOH = 100/1→50/1, v/v) afforded **5a** as a yellow solid (55 mg, 51% yield, AE = 41%). M.p.: 190–192 °C. <sup>1</sup>H NMR (500 MHz, CDCl<sub>3</sub>): δ = 8.10–7.99 (m, 4H), 7.95–7.70 (m, 10H), 7.50–7.44 (m, 1H) ppm. <sup>13</sup>C NMR (126 MHz, CDCl<sub>3</sub>): δ = 143.2, 135.8, 135.5, 134.7, 134.1, 133.8, 131.4, 130.9, 130.7, 130.1, 129.5, 126.7, 126.6, 126.0, 124.6, 124.3, 123.1, 122.8, 122.7 ppm. HRMS (ESI) *m/z*: calcd for C<sub>21</sub>H<sub>15</sub>Br<sub>2</sub>N<sub>2</sub><sup>+</sup> ([M–BF<sub>4</sub><sup>–</sup>]<sup>+</sup>) 454.9582, found 454.9581.

### 1-Phenyl-2,3-di-*p*-tolyl-1H-imidazol-3-ium Tetrafluoroborate (**5b**)

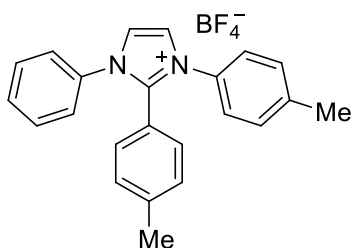

Following the general procedure A, 1-phenylimidazole **1a** (28.8 mg, 0.2 mmol) and di-*p*-tolyliodonium tetrafluoroborate **2c** (79.2 mg, 0.2 mmol) were used. Purification via a silica (100-200 meshes) gel column (CH<sub>2</sub>Cl<sub>2</sub>/MeOH = 100/1→50/1, v/v) afforded **5b** as a yellow solid (50 mg, 61% yield, AE = 46%). M.p.: 192–194 °C. <sup>1</sup>H NMR (500 MHz, CDCl<sub>3</sub>): δ = 7.66 (d, *J* = 6.5 Hz, 2H), 7.49 (d, *J* = 8.5 Hz, 2H), 7.42–7.35 (m, 5H), 7.17–7.15 (m, 4H), 7.01 (d, *J* = 10.0 Hz, 2H), 2.33 (s, 3H), 2.25 (s, 3H) ppm. <sup>13</sup>C NMR (126 MHz, CDCl<sub>3</sub>): δ = 144.7, 142.7, 140.8, 135.2, 132.6, 131.1, 130.6, 130.5, 130.0, 129.8, 126.6, 126.2, 124.3, 124.1, 118.1, 21.6, 21.3 ppm. HRMS (ESI) *m/z*: calcd for C<sub>23</sub>H<sub>21</sub>N<sub>2</sub><sup>+</sup> ([M–BF<sub>4</sub><sup>–</sup>]<sup>+</sup>) 325.1705, found 325.1715.

### 2,3-Bis(4-chlorophenyl)-1-phenyl-1*H*-imidazol-3-ium Tetrafluoroborate (**5c**)

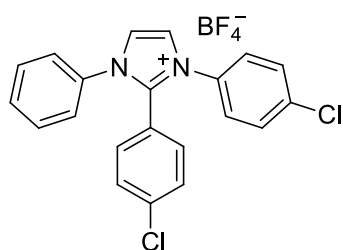

Following the general procedure A, 1-phenylimidazole **1a** (28.8 mg, 0.2 mmol) and bis(4-chlorophenyl)iodonium tetrafluoroborate **2d** (83.4 mg, 0.2 mmol) were used. Purification via a silica (100-200 meshes) gel column (CH<sub>2</sub>Cl<sub>2</sub>/MeOH = 100/1→50/1, v/v) afforded **5c** as a white solid (67 mg, 74% yield, AE = 60%). M.p.: 217–219 °C. <sup>1</sup>H NMR (400 MHz, CDCl<sub>3</sub>): δ = 7.64 (d, *J* = 1.6 Hz, 1H), 7.60 (d, *J* = 1.6 Hz, 1H), 7.47–7.42 (m, 5H), 7.39–7.31 (m, 4H), 7.28–7.26 (m, 2H), 7.21 (d, *J* = 8.4 Hz, 2H) ppm. <sup>13</sup>C NMR (101 MHz, CDCl<sub>3</sub>): δ = 143.9, 138.9, 137.0, 134.9, 133.4, 132.8, 130.8, 130.3, 130.1, 129.6, 128.1, 126.6, 124.4, 124.3, 119.5 ppm. HRMS (ESI) *m/z*: calcd for C<sub>21</sub>H<sub>15</sub>Cl<sub>2</sub>N<sub>2</sub><sup>+</sup> ([M–BF<sub>4</sub><sup>–</sup>]<sup>+</sup>) 365.0612, found 365.0615.

### 2,3-Bis(4-methoxyphenyl)-1-(thiophen-2-yl)-1*H*-imidazol-3-ium Tetrafluoroborate (**5d**)

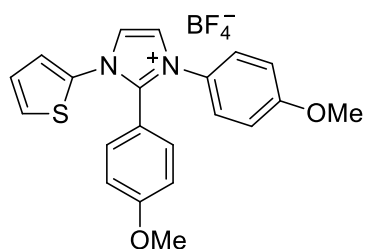

Following the general procedure A, 1-(thiophen-2-yl)-1*H*-imidazole **1g** (30.0 mg, 0.2 mmol) and bis(4-methoxyphenyl)iodonium tetrafluoroborate **2f** (85.6 mg, 0.2 mmol) were used. Purification via a silica (100-200 meshes) gel column (CH<sub>2</sub>Cl<sub>2</sub>/MeOH = 100/1→50/1, v/v) afforded **5d** as a white solid (60 mg, 67% yield, AE = 52%). M.p.: 66–68 °C. <sup>1</sup>H NMR (400 MHz, DMSO-*d*<sub>6</sub>): δ = 8.39 (d, *J* = 2.0 Hz, 1H), 8.28 (d, *J* = 2.4 Hz, 1H), 7.64 (dd, *J* = 5.6 Hz, 1.2 Hz, 1H), 7.42 (d, *J* = 8.8 Hz, 4H), 7.37 (dd, *J* = 3.6 Hz, 1.2 Hz, 1H), 7.09–7.05 (m, 3H), 6.94 (d, *J* = 8.8 Hz, 2H), 3.77 (s, 3H), 3.73 (s, 3H) ppm. <sup>13</sup>C NMR (101 MHz, DMSO-*d*<sub>6</sub>): δ = 161.7, 160.2, 146.0, 134.5, 133.0, 128.0, 127.8, 127.7, 127.1, 126.1, 124.6, 124.1, 114.7, 114.2, 112.9, 55.6, 55.4 ppm. HRMS (ESI) *m/z*: calcd for C<sub>21</sub>H<sub>19</sub>N<sub>2</sub>O<sub>2</sub>S<sup>+</sup> ([M–BF<sub>4</sub><sup>–</sup>]<sup>+</sup>) 363.1167, found 363.1168.

### 2,3-Bis(4-chlorophenyl)-1-(thiophen-2-yl)-1*H*-imidazol-3-ium Tetrafluoroborate (**5e**)

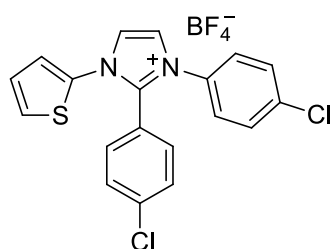

Following the general procedure A, 1-(thiophen-2-yl)-1*H*-imidazole **1g** (30.0 mg, 0.2 mmol) and bis(4-chlorophenyl)iodonium tetrafluoroborate **2d** (83.4 mg, 0.2 mmol) were used. Purification via a silica (100-200 meshes) gel column (CH<sub>2</sub>Cl<sub>2</sub>/MeOH = 100/1→50/1, v/v) afforded **5e** as a white solid (52 mg, 57% yield, AE = 46%). M.p.: 82–84 °C. <sup>1</sup>H NMR (400 MHz, DMSO-*d*<sub>6</sub>): δ = 8.49 (d, *J* = 2.4 Hz, 1H), 8.42 (d, *J* = 2.0 Hz, 1H), 7.68–7.64 (m, 3H), 7.54–7.50 (m, 6H), 7.37 (dd, *J* = 3.6 Hz, 1.2 Hz, 1H), 7.10–7.08 (m, 1H) ppm. <sup>13</sup>C NMR (101 MHz, DMSO-*d*<sub>6</sub>): δ = 144.8, 137.4, 135.3, 133.77, 133.6, 133.2, 129.9, 129.1, 128.4, 128.2, 127.5, 126.2, 125.4, 124.1, 120.0 ppm. HRMS (ESI) *m/z*: calcd for C<sub>19</sub>H<sub>13</sub>Cl<sub>3</sub>N<sub>2</sub>S<sup>+</sup> ([M–BF<sub>4</sub><sup>–</sup>]<sup>+</sup>) 371.0176, found 371.0175.

### 2,3-Bis(4-bromophenyl)-1-phenyl-1*H*-benzo[d]imidazol-3-ium Tetrafluoroborate (**5f**)

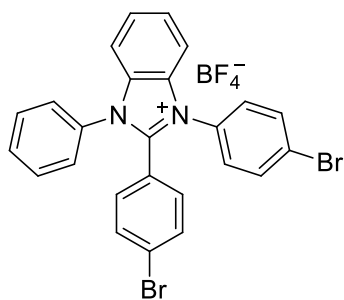

Following the general procedure A, 1-phenyl benzoimidazole **1j** (38.8 mg, 0.2 mmol) and bis(4-bromophenyl)iodonium tetrafluoroborate **2e** (105.1 mg, 0.2 mmol) were used. Purification via a silica (100-200 meshes) gel column (CH<sub>2</sub>Cl<sub>2</sub>/MeOH = 100/1→50/1, v/v) afforded **5f** as brown solid (70 mg, 59% yield, AE = 52%). M.p.: 154–156 °C. <sup>1</sup>H NMR (500 MHz, DMSO-*d*<sub>6</sub>): δ = 8.05–7.76 (m, 6H), 7.66–7.58 (m, 8H), 7.47–7.26 (m, 3H) ppm. <sup>13</sup>C NMR (126 MHz, DMSO-*d*<sub>6</sub>): δ = 149.7, 139.3, 137.7, 133.5, 133.1, 132.7, 132.4, 132.2, 132.0, 131.6, 131.1, 130.4, 129.6, 128.0, 127.4, 126.8, 124.4, 120.4, 113.5 ppm. HRMS (ESI) *m/z*: calcd for C<sub>25</sub>H<sub>17</sub>Br<sub>2</sub>N<sub>2</sub><sup>+</sup> ([M-BF<sub>4</sub><sup>-</sup>]<sup>+</sup>) 504.9738, found 504.9735.

### 2,3-Bis(4-Methoxyphenyl)-1-phenyl-1*H*-benzo[d]imidazol-3-ium Tetrafluoroborate (**5g**)

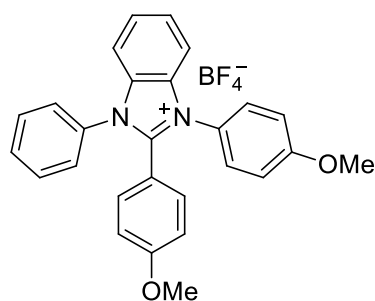

Following the general procedure A, 1-phenyl benzoimidazole **1j** (38.8 mg, 0.2 mmol) and bis(4-methoxyphenyl)iodonium tetrafluoroborate **2f** (85.6 mg, 0.2 mmol) were used. Purification via a silica (100-200 meshes) gel column (CH<sub>2</sub>Cl<sub>2</sub>/MeOH = 100/1→50/1, v/v) afforded **5g** as white solid (54 mg, 55% yield, AE = 47%). M.p.: 122–124 °C. <sup>1</sup>H NMR (500 MHz, CDCl<sub>3</sub>): δ = 7.63–7.1 (m, 2H), 7.59–7.51 (m, 7H), 7.45–7.42 (m, 2H), 7.33 (d, *J* = 9.0 Hz, 2H), 6.99 (d, *J* = 9.0 Hz, 2H), 6.72 (d, *J* = 9.0 Hz, 2H), 3.84 (s, 3H), 3.71 (s, 3H) ppm. <sup>13</sup>C NMR (126 MHz, CDCl<sub>3</sub>): δ = 162.6, 161.1, 150.6, 133.4, 133.3, 133.1, 132.9, 130.8, 130.5, 129.2, 127.9, 127.7, 125.3, 115.6, 114.6, 113.6, 113.4, 112.6, 55.8, 55.5 ppm. HRMS (ESI) *m/z*: calcd for C<sub>27</sub>H<sub>23</sub>N<sub>2</sub>O<sub>2</sub><sup>+</sup> ([M-BF<sub>4</sub><sup>-</sup>]<sup>+</sup>) 407.1760, found 407.1763.

### 2,3-Bis(4-bromophenyl)-1-(4-methoxyphenyl)-1*H*-benzo[d]imidazol-3-ium Tetrafluoroborate (**5h**)

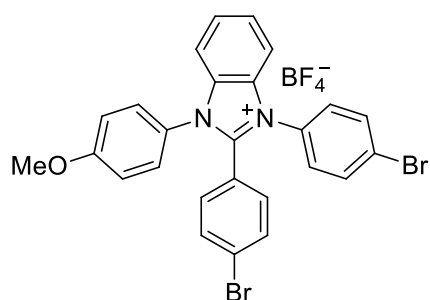

Following the general procedure A, 1-(4-methoxyphenyl)-1*H*-benzo[d]imidazole **1m** (44.9 mg, 0.2 mmol) and bis(4-bromophenyl)iodonium tetrafluoroborate **2e** (105.1 mg, 0.2 mmol) were used. Purification via a silica (100-200 meshes) gel column (CH<sub>2</sub>Cl<sub>2</sub>/MeOH = 100/1→50/1, v/v) afforded **5h** as yellow solid (78 mg, 63% yield, AE = 52%). M.p.: 142–144 °C. <sup>1</sup>H NMR (400 MHz, CDCl<sub>3</sub>): δ = 7.59–7.57 (m, 4H), 7.53–7.49 (m, 4H), 7.42–7.33 (m, 6H), 6.93 (d, *J* = 8.8 Hz, 2H), 3.82 (s, 3H) ppm. <sup>13</sup>C NMR (101 MHz, CDCl<sub>3</sub>): δ = 161.3, 149.5, 133.8, 133.4, 133.1, 132.8, 132.5, 131.7, 129.7, 129.2, 128.03, 127.99, 127.9, 125.5, 124.9, 119.9, 115.6, 113.7, 113.3, 55.8 ppm. HRMS (ESI) *m/z*: calcd for C<sub>26</sub>H<sub>19</sub>Br<sub>2</sub>N<sub>2</sub>O<sup>+</sup> ([M-BF<sub>4</sub><sup>-</sup>]<sup>+</sup>) 534.9844, found 534.9846.

### 1,3-Diphenyl-2-(*o*-tolyl)-1*H*-imidazol-3-ium Tetrafluoroborate (**5i**)

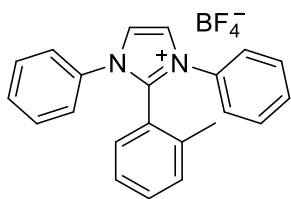

Following the general procedure A, 1-phenylimidazole **1a** (28.8 mg, 0.2 mmol) and phenyl(*o*-tolyl)iodonium tetrafluoroborate **2g** (76.4 mg, 0.2 mmol) were used. Purification via a silica (100-200 meshes) gel column (CH<sub>2</sub>Cl<sub>2</sub>/MeOH = 100/1→50/1, v/v) afforded **5i** as a gray solid (50 mg, 63% yield, AE = 48%).

M.p.: 178–180 °C. <sup>1</sup>H NMR (500 MHz, CDCl<sub>3</sub>): δ = 7.79 (s, 2H), 7.64 (t, *J* = 7.0 Hz, 1H), 7.42–7.36 (m, 10H), 7.31 (t, *J* = 7.5 Hz, 1H), 7.18 (d, *J* = 7.5 Hz, 1H), 7.06 (d, *J* = 7.5 Hz, 1H), 1.91 (s, 3H) ppm. <sup>13</sup>C NMR (126 MHz, CDCl<sub>3</sub>): δ = 144.6, 138.2, 134.8, 132.7, 132.6, 130.7, 130.6, 130.0, 126.9, 125.8, 124.3, 120.9, 19.7 ppm. HRMS (ESI) *m/z*: calcd for C<sub>22</sub>H<sub>19</sub>N<sub>2</sub><sup>+</sup> ([M–BF<sub>4</sub><sup>–</sup>]<sup>+</sup>) 311.1548, found 311.1556.

### 3-(4-Methoxyphenyl)-1-phenyl-2-(*o*-tolyl)-1*H*-imidazol-3-ium Trifluoromethanesulfonate (**5j**)

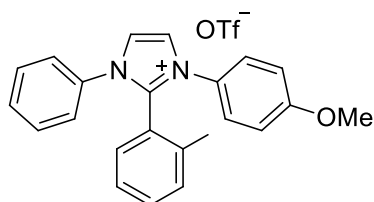

Following the general procedure A, 1-phenylimidazole **1a** (28.8 mg, 0.2 mmol) and (4-methoxyphenyl)(*o*-tolyl)iodonium triflate **2h** (94.8 mg, 0.2 mmol) were used. Purification via a silica (100-200 meshes) gel column (CH<sub>2</sub>Cl<sub>2</sub>/MeOH = 100/1→50/1, v/v) afforded **5j** as a gray solid (45 mg, 46% yield, AE = 36%).

M.p.: > 240 °C. <sup>1</sup>H NMR (500 MHz, CDCl<sub>3</sub>): δ = 7.90 (s, 2H), 7.79 (d, *J* = 7.5 Hz, 1H), 7.47 (d, *J* = 7.5 Hz, 2H), 7.42–7.36 (m, 5H), 7.32 (t, *J* = 7.5 Hz, 1H), 7.20 (t, *J* = 7.5 Hz, 1H), 7.08 (d, *J* = 7.5 Hz, 1H), 6.86 (d, *J* = 7.5 Hz, 2H), 3.76 (s, 3H), 1.94 (s, 3H) ppm. <sup>13</sup>C NMR (126 MHz, CDCl<sub>3</sub>): δ = 160.9, 144.5, 138.1, 134.8, 133.1, 132.6, 130.7, 130.6, 130.1, 127.3, 127.2, 126.93, 125.9, 124.9, 124.4, 120.9, 115.2, 55.8, 20.0 ppm. HRMS (ESI) *m/z*: calcd for C<sub>23</sub>H<sub>21</sub>N<sub>2</sub>O<sup>+</sup> ([M–OTf]<sup>+</sup>) 341.1654, found 341.1655.

### 3-(4-Cyanophenyl)-2-(1,3-dimethyl-2,4-dioxo-1,2,3,4-tetrahydropyrimidin-5-yl)-1-phenyl-1*H*-imidazol-3-ium Trifluoromethanesulfonate (**5k** or **5k'**)

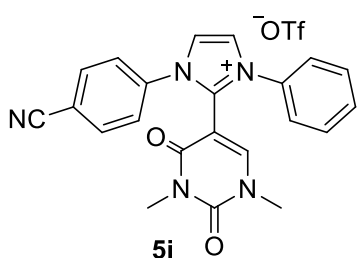

Following the general procedure A, 4-(1*H*-imidazol-1-yl)benzotrile **1f** (33.8 mg, 0.2 mmol) and (1,3-dimethyl-2,4-dioxo-1,2,3,4-tetrahydropyrimidin-5-yl)(phenyl)iodonium triflate **2i** (98.4 mg, 0.2 mmol) were used. Purification via a silica (100-200 meshes) gel column (CH<sub>2</sub>Cl<sub>2</sub>/MeOH = 100/1→50/1, v/v) afforded **5k** as a white solid (34 mg, 32% yield, AE = 26%).

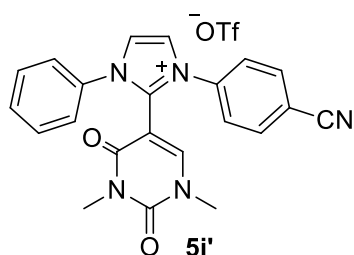

Following the general procedure A, the reaction of 1-phenylimidazole **1a** (28.8 mg, 0.2 mmol) and (4-cyanophenyl)(1,3-dimethyl-2,4-dioxo-1,2,3,4-tetrahydropyrimidin-5-yl)iodonium triflate **2j** (103.4 mg, 0.2 mmol) afforded **5k'** as a white solid (62 mg, 58% yield, AE = 47%). M.p.: 132–134 °C. <sup>1</sup>H NMR (500 MHz, CDCl<sub>3</sub>): δ = 8.43 (s, 1H), 7.88–7.83 (m, 4H),

7.66-7.55 (m, 7H), 3.29 (s, 3H), 3.21 (s, 3H) ppm.  $^{13}\text{C}$  NMR (126 MHz,  $\text{CDCl}_3$ ):  $\delta$  = 160.9, 151.7, 150.4, 139.7, 138.3, 134.5, 134.2, 131.6, 130.5, 127.4, 126.2, 124.9, 124.1, 117.1, 115.6, 94.1, 38.2, 28.5 ppm. HRMS (ESI)  $m/z$ : calcd for  $\text{C}_{22}\text{H}_{18}\text{N}_5\text{O}_2^+$  ( $[\text{M}-\text{OTf}]^+$ ) 384.1460, found 384.1461.

**1-(4-Cyanophenyl)-3-phenyl-1*H*-imidazol-3-ium Trifluoromethanesulfonate (3e).**<sup>[11]</sup> In the reaction

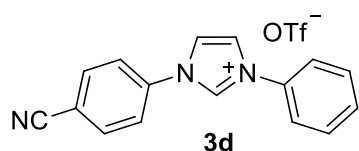

of **1f** and **2h**, **3d** was isolated as a side-product (white solid, 17 mg, 25% yield).  $^1\text{H}$  NMR (500 MHz,  $\text{DMSO}-d_6$ ):  $\delta$  = 10.37 (s, 1H), 8.58 (t,  $J$  = 1.5 Hz, 2H), 7.97 (d,  $J$  = 9.0 Hz, 2H), 7.91 (d,  $J$  = 8.0 Hz, 2H), 7.83 (d,  $J$  = 8.5 Hz, 2H), 7.72 (t,  $J$  = 8.0 Hz, 2H), 7.64 (t,  $J$  = 7.5 Hz, 1H) ppm.

**(*E*)-1,2-Diphenyl-3-styryl-1*H*-imidazol-3-ium Trifluoromethanesulfonate (5l)**

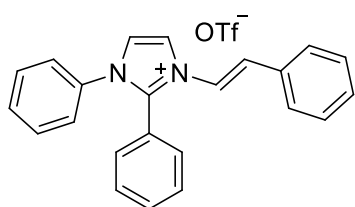

Following the general procedure A, 1-phenylimidazole **1a** (28.8 mg, 0.2 mmol) and (*E*)-phenyl(styryl)iodonium triflate **2k** (91.2 mg, 0.2 mmol) were used. Purification via a silica (100-200 meshes) gel column ( $\text{CH}_2\text{Cl}_2/\text{MeOH}$  = 100/1 $\rightarrow$ 50/1, v/v) afforded **5l** as a white solid (67 mg, 71% yield, AE = 56%). M.p.: 181–183  $^\circ\text{C}$ .  $^1\text{H}$  NMR (400 MHz,  $\text{DMSO}-d_6$ ):  $\delta$  = 8.66 (s, 1H), 8.39 (s, 1H), 7.62–7.48 (m, 13H), 7.40 (m, 4H) ppm.  $^{13}\text{C}$  NMR (101 MHz,  $\text{DMSO}-d_6$ ):  $\delta$  = 143.7, 134.8, 132.8, 132.3, 131.3, 130.3, 129.6, 129.3, 129.1, 129.0, 127.4, 127.1, 126.3, 124.7, 120.9, 120.7, 119.8 ppm. HRMS (ESI)  $m/z$ : calcd for  $\text{C}_{23}\text{H}_{19}\text{N}_2^+$  ( $[\text{M}-\text{OTf}]^+$ ) 323.1548, found 323.1557.

**1,2,3-Tris(4-chlorophenyl)-1*H*-imidazol-3-ium Tetrafluoroborate (7b).**

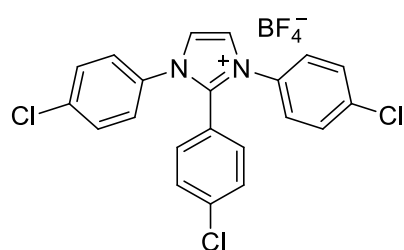

Following the general procedure B, imidazole **6a** (13.6 mg, 0.2 mmol) and bis(4-chlorophenyl)iodonium tetrafluoroborate **2d** (166.8 mg, 0.4 mmol) were used. Purification via a silica (100-200 meshes) gel column ( $\text{CH}_2\text{Cl}_2/\text{MeOH}$  = 100/1 $\rightarrow$ 50/1, v/v) afforded **7b** as a white solid (80 mg, 82% yield). M.p.: > 240  $^\circ\text{C}$ .  $^1\text{H}$  NMR (400 MHz,  $\text{DMSO}-d_6$ ):  $\delta$  = 8.43 (s, 2H), 7.66 (d,  $J$  = 8.4 Hz, 4H), 7.51–7.49 (m, 6H), 7.42 (d,  $J$  = 8.4 Hz, 2H) ppm.  $^{13}\text{C}$  NMR (101 MHz,  $\text{DMSO}-d_6$ ):  $\delta$  = 143.6, 137.2, 135.2, 133.5, 133.1, 129.9, 129.1, 128.2, 124.2, 120.0 ppm. HRMS (ESI)  $m/z$ : calcd for  $\text{C}_{21}\text{H}_{14}\text{Cl}_3\text{N}_2^+$  ( $[\text{M}-\text{BF}_4^-]^+$ ) 399.0223, found 399.0217.

**1,4,5-Triphenyl-1*H*-1,2,4-triazol-4-ium Tetrafluoroborate (7d).**

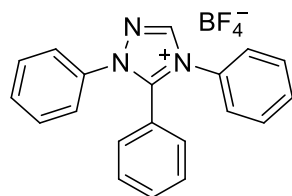

Following the general procedure A, 1-phenyl-1*H*-1,2,4-triazole **1s** (29.0 mg, 0.2 mmol) and diphenyliodonium tetrafluoroborate **2a** (73.6 mg, 0.2 mmol) were used. Purification via a silica (100-200 meshes) gel column ( $\text{CH}_2\text{Cl}_2/\text{MeOH}$  = 50/1 $\rightarrow$ 20/1, v/v) afforded **7d** as a white solid (32 mg, 42%



yield, AE = 31%).

Following the general procedure B, the reaction of 1*H*-1,2,4-triazole **6c** (28.8 mg, 0.2 mmol) and diphenyliodonium tetrafluoroborate **2a** (147.2 mg, 0.4 mmol) afforded **7d** as a gray solid (31 mg, 40% yield). M.p.: 204–206 °C. <sup>1</sup>H NMR (400 MHz, DMSO-*d*<sub>6</sub>): δ = 9.92 (s, 1H), 7.62–7.53 (m, 11H), 7.49–7.42 (m, 4H) ppm. <sup>13</sup>C NMR (101 MHz, DMSO-*d*<sub>6</sub>): δ = 151.0, 144.8, 135.1, 133.0, 131.8, 131.3, 130.8, 130.1, 130.0, 129.1, 126.5, 125.8, 124.0, 119.2 ppm. HRMS (ESI) *m/z*: calcd for C<sub>20</sub>H<sub>16</sub>N<sub>3</sub><sup>+</sup> ([M–BF<sub>4</sub><sup>–</sup>]<sup>+</sup>) 298.1344, found 298.1340.

### 1,2,3,4,5-Pentaphenyl-1*H*-imidazol-3-ium Tetrafluoroborate (**8a**)<sup>[13]</sup>

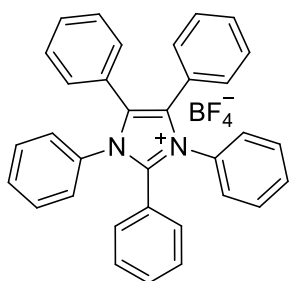

Following the general procedure A, 1,4,5-triphenyl-1*H*-imidazole **1t** (59.3 mg, 0.2 mmol) and diphenyliodonium tetrafluoroborate **2a** (73.6 mg, 0.2 mmol) were used. Purification via a silica (100-200 meshes) gel column (CH<sub>2</sub>Cl<sub>2</sub>/MeOH = 100/1→50/1, v/v) afforded **8a** as a white solid (83 mg, 78% yield, AE = 62%).

Following the general procedure B, the reaction of 4,5-diphenyl-1*H*-imidazole **6d** (44.1 mg, 0.2 mmol) and diphenyliodonium tetrafluoroborate **2a** (147.2 mg, 0.4 mmol) afforded **8a** as a white solid (81 mg, 76% yield). M.p.: > 240 °C. <sup>1</sup>H NMR (400 MHz, DMSO-*d*<sub>6</sub>): δ = 7.49–7.47 (m, 6H), 7.39–7.36 (m, 7H), 7.32–7.25 (m, 12H) ppm. <sup>13</sup>C NMR (101 MHz, DMSO-*d*<sub>6</sub>): δ = 144.9, 133.3, 131.7, 131.5, 131.0, 130.8, 130.3, 129.7, 129.4, 128.6, 128.4, 128.1, 125.4, 122.1 ppm. HRMS (ESI) *m/z*: calcd for C<sub>33</sub>H<sub>25</sub>N<sub>2</sub><sup>+</sup> ([M–BF<sub>4</sub><sup>–</sup>]<sup>+</sup>) 449.2018, found 449.2014.

### 4,5-Diphenyl-1,2,3-tri-*p*-tolyl-1*H*-imidazol-3-ium Tetrafluoroborate (**8b**)

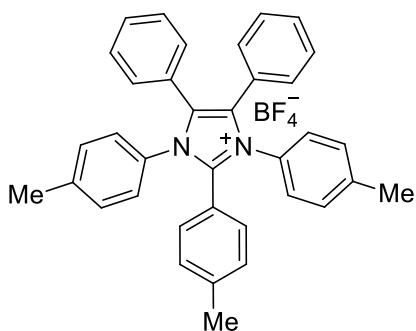

Following the general procedure B, 4,5-diphenyl-1*H*-imidazole **6d** (44.1 mg, 0.2 mmol) and di-*p*-tolyliodonium tetrafluoroborate **2c** (158.4 mg, 0.4 mmol) were used. Purification via a silica (100-200 meshes) gel column (CH<sub>2</sub>Cl<sub>2</sub>/EtOAc = 10/1→1/1, v/v) afforded **8b** as a white solid (71 mg, 61% yield). M.p.: > 240 °C. <sup>1</sup>H NMR (400 MHz, DMSO-*d*<sub>6</sub>): δ = 7.33–7.30 (m, 12H), 7.23–7.17 (m, 8H), 7.13 (d, *J* = 7.6 Hz, 2H), 2.23 (s, 6H), 2.21 (s, 3H) ppm. <sup>13</sup>C NMR (101 MHz, DMSO-*d*<sub>6</sub>): δ = 145.1, 141.5, 140.0, 131.6, 130.9, 130.8, 130.7, 129.8, 129.7, 129.0, 128.5, 127.8, 125.5, 119.3, 20.8, 20.6 ppm. HRMS (ESI) *m/z*: calcd for C<sub>36</sub>H<sub>31</sub>N<sub>2</sub><sup>+</sup> ([M–BF<sub>4</sub><sup>–</sup>]<sup>+</sup>) 491.2487, found 491.2489.

### 1,2,3-Tris(4-chlorophenyl)-4,5-diphenyl-1*H*-imidazol-3-ium Tetrafluoroborate (**8c**)

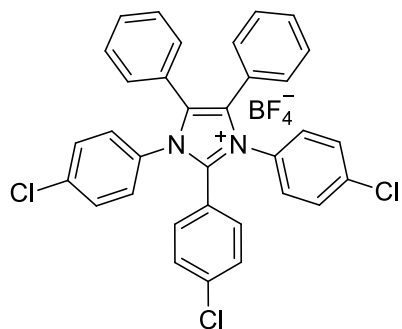

Following the general procedure B, 4,5-diphenyl-1*H*-imidazole **6d** (44.1 mg, 0.2 mmol) and bis(4-chlorophenyl)iodonium tetrafluoroborate **2d** (174.7 mg, 0.4 mmol) were used. Purification via a silica (100-200 meshes) gel column (CH<sub>2</sub>Cl<sub>2</sub>/EtOAc = 10/1→1/1, v/v) afforded **8c** as a white solid (106 mg, 83% yield). M.p.: > 240 °C. <sup>1</sup>H NMR (400 MHz, DMSO-*d*<sub>6</sub>): δ = 7.54–7.52 (m, 12H), 7.38–7.32 (m, 6H), 7.24–7.22 (m, 4H) ppm. <sup>13</sup>C NMR (101 MHz, DMSO-*d*<sub>6</sub>): δ = 143.9, 137.0, 135.2, 132.9, 131.9, 130.7, 130.0, 129.8, 129.8, 129.0, 128.8, 124.9, 120.6 ppm. HRMS (ESI) *m/z*: calcd for C<sub>33</sub>H<sub>22</sub>Cl<sub>3</sub>N<sub>2</sub><sup>+</sup> ([M-BF<sub>4</sub><sup>-</sup>]<sup>+</sup>) 551.0849, found 551.0837.

### 4,5-Bis(3-methoxyphenyl)-1,2,3-triphenyl-1*H*-imidazol-3-ium Tetrafluoroborate (**8d**)

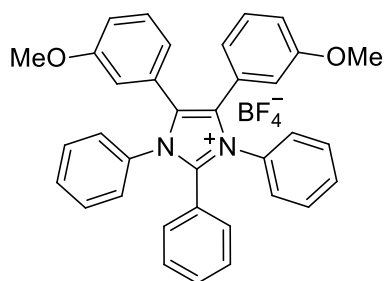

Following the general procedure B, 4,5-bis(3-methoxyphenyl)-1*H*-imidazole **6e** (56.1 mg, 0.2 mmol) and diphenyliodonium tetrafluoroborate **2a** (147.2 mg, 0.4 mmol) were used. Purification via a silica (100-200 meshes) gel column (CH<sub>2</sub>Cl<sub>2</sub>/EtOAc = 10/1→1/1, v/v) afforded **8d** as a white solid (83 mg, 70% yield). M.p.: > 240 °C. <sup>1</sup>H NMR (500 MHz, DMSO-*d*<sub>6</sub>): δ = 7.50–7.44 (m, 6H), 7.42–7.36 (m, 7H), 7.1 (t, *J* = 9.5 Hz, 2H), 7.24 (t, *J* = 10.0 Hz, 2H), 6.91 (dd, *J* = 10.0 Hz, 3.0 Hz, 2H), 6.83 (d, *J* = 9.5 Hz, 2H), 6.77 (t, *J* = 2.5 Hz, 2H), 3.57 (s, 6H) ppm. <sup>13</sup>C NMR (126 MHz, DMSO-*d*<sub>6</sub>): δ = 158.8, 144.9, 133.3, 131.6, 131.4, 131.0, 130.4, 129.9, 129.5, 128.5, 128.2, 126.6, 122.9, 122.1, 116.4, 115.2, 55.0 ppm. HRMS (ESI) *m/z*: calcd for C<sub>39</sub>H<sub>29</sub>N<sub>2</sub>O<sub>2</sub><sup>+</sup> ([M-BF<sub>4</sub><sup>-</sup>]<sup>+</sup>) 509.2229, found 509.2235.

### 1,2,3-Tris(4-chlorophenyl)-4,5-bis(3-methoxyphenyl)-1*H*-imidazol-3-ium Tetrafluoroborate (**8e**)

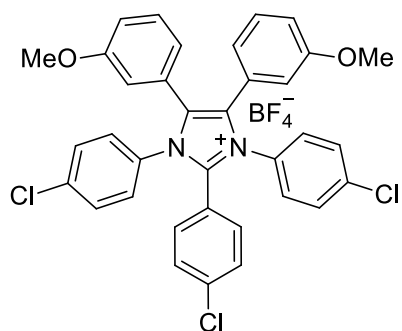

Following the general procedure B, 4,5-bis(3-methoxyphenyl)-1*H*-imidazole **6e** (56.1 mg, 0.2 mmol) and bis(4-chlorophenyl)iodonium tetrafluoroborate **2d** (174.7 mg, 0.4 mmol) were used. Purification via a silica (100-200 meshes) gel column (CH<sub>2</sub>Cl<sub>2</sub>/EtOAc = 10/1→1/1, v/v) afforded **8e** as a white solid (95 mg, 69% yield). M.p.: > 240 °C. <sup>1</sup>H NMR (500 MHz, DMSO-*d*<sub>6</sub>): δ = 7.55 (d, *J* = 11.0 Hz, 4H), 7.51–7.45 (m, 8H), 7.28 (t, *J* = 10.0 Hz, 2H), 6.96 (dd, *J* = 10.5 Hz, 3.0 Hz, 2H), 6.80 (d, *J* = 10.0 Hz, 2H), 6.74 (t, *J* = 2.0 Hz, 2H), 3.60 (s, 6H) ppm. <sup>13</sup>C NMR (126 MHz, DMSO-*d*<sub>6</sub>): δ = 158.8, 144.0, 137.1, 135.3, 132.9, 131.9, 131.6, 130.2, 129.88, 129.86, 129.1, 126.1, 122.9, 120.5, 116.4, 115.4, 55.1 ppm. HRMS (ESI) *m/z*: calcd for C<sub>35</sub>H<sub>26</sub>Cl<sub>3</sub>N<sub>2</sub>O<sub>2</sub><sup>+</sup> ([M-BF<sub>4</sub><sup>-</sup>]<sup>+</sup>) 611.1060, found 611.1061.

### 1,2,3,4,5-Pentakis(4-methoxyphenyl)-1*H*-imidazol-3-ium Tetrafluoroborate (**8f**)

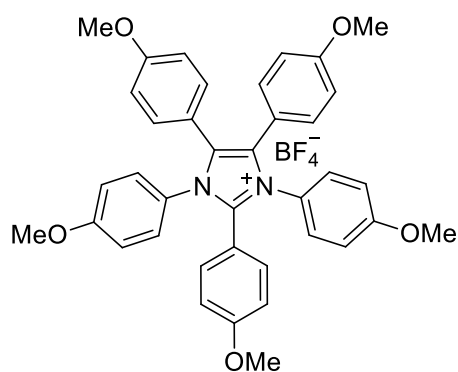

Following the general procedure B, 4,5-bis(4-methoxyphenyl)-1*H*-imidazole **6f** (56.1 mg, 0.2 mmol) and bis(4-methoxyphenyl)iodonium tetrafluoroborate **2f** (171.2 mg, 0.4 mmol) were used. Purification via a silica (100-200 meshes) gel column (CH<sub>2</sub>Cl<sub>2</sub>/EtOAc = 10/1→1/1, v/v) afforded **8f** as a white solid (89 mg, 65% yield). M.p.: > 240 °C. <sup>1</sup>H NMR (400 MHz, DMSO-*d*<sub>6</sub>): δ = 7.37–7.34 (m, 6H), 7.13 (d, *J* = 8.8 Hz, 4H), 6.93 (d, *J* = 8.8 Hz, 4H), 6.86 (d, *J* = 8.4 Hz, 6H), 3.70 (s, 6H), 3.69 (s, 6H), 3.68 (s, 3H) ppm. <sup>13</sup>C NMR (126 MHz, DMSO-*d*<sub>6</sub>): δ = 161.0, 159.81, 159.78, 145.1, 132.7, 132.2, 131.3, 129.5, 126.2, 117.7, 114.5, 114.2, 114.1, 114.0, 55.4, 55.3, 55.1 ppm. HRMS (ESI) *m/z*: calcd for C<sub>38</sub>H<sub>35</sub>N<sub>2</sub>O<sub>5</sub><sup>+</sup> ([M-BF<sub>4</sub>]<sup>+</sup>) 599.2546, found 599.2547.

### 1,2,3,4,5-Pentakis(4-methoxyphenyl)-1*H*-imidazol-3-ium Tosylates (**8f-OTs**)

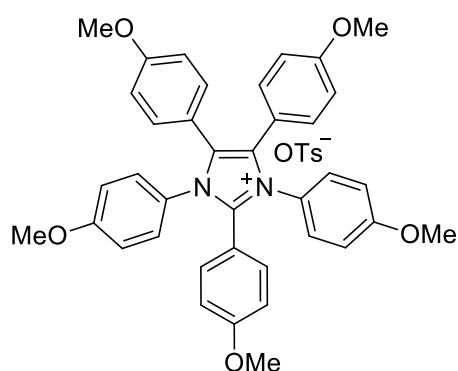

Following the general procedure B, 4,5-bis(4-methoxyphenyl)-1*H*-imidazole **6f** (56.1 mg, 0.2 mmol) and bis(4-methoxyphenyl)iodonium tosylates **2f-OTs** (204.9 mg, 0.4 mmol) were used. Purification via a silica (100-200 meshes) gel column (CH<sub>2</sub>Cl<sub>2</sub>/EtOAc~CH<sub>2</sub>Cl<sub>2</sub>/MeOH = 1/1~20/1, v/v) afforded **8f-OTs** as a gray solid (75mg, 49% yield). M.p.: > 240 °C. <sup>1</sup>H NMR (400 MHz, DMSO-*d*<sub>6</sub>): δ = 7.50 (d, *J* = 8.0 Hz, 2H), 7.40–7.37 (m, 6H), 7.16–7.10 (m, 6H), 6.92 (d, *J* = 8.8 Hz, 4H), 6.85 (d, *J* = 8.4 Hz, 6H), 3.70 (s, 6H), 3.69 (s, 6H), 3.68 (s, 3H), 2.28 (s, 3H) ppm. <sup>13</sup>C NMR (126 MHz, DMSO-*d*<sub>6</sub>): δ = 161.0, 159.9, 159.8, 145.9, 145.1, 137.6, 132.8, 132.3, 131.3, 129.6, 128.1, 126.2, 125.5, 117.8, 114.4, 114.3, 114.0, 113.9, 55.4, 55.3, 55.1, 20.8 ppm. HRMS (ESI) *m/z*: calcd for C<sub>38</sub>H<sub>35</sub>N<sub>2</sub>O<sub>5</sub><sup>+</sup> ([M-BF<sub>4</sub>]<sup>+</sup>) 599.2546, found 599.2546.

### 1,2,3-Priphenyl-1*H*-phenanthro[9,10-*d*]imidazol-3-ium Tetrafluoroborate (**9**)

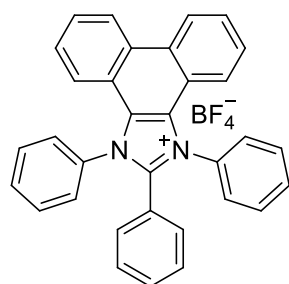

Following the general procedure B, 1*H*-phenanthro[9,10-*d*]imidazole **6e** (43.7 mg, 0.2 mmol) and diphenyliodonium tetrafluoroborate **2a** (147.2 mg, 0.4 mmol) were used. Purification via a silica (100-200 meshes) gel column (CH<sub>2</sub>Cl<sub>2</sub>/MeOH = 50/1→30/1, v/v) afforded **9** as a white solid (45 mg, 42% yield). M.p.: > 240 °C. <sup>1</sup>H NMR (400 MHz, DMSO-*d*<sub>6</sub>): δ = 9.16 (d, *J* = 8.8 Hz, 2H), 7.88–7.83 (m, 6H), 7.73–7.71 (m, 6H), 7.65 (d, *J* = 7.2 Hz, 2H), 7.58 (t, *J*

= 7.6 Hz, 2H), 7.38–7.31 (m, 3H), 7.12 (d, J = 8.4 Hz, 2H) ppm.  $^{13}\text{C}$  NMR (101 MHz, DMSO- $d_6$ ):  $\delta$  = 149.6, 134.8, 131.8, 131.7, 131.2, 130.7, 129.6, 128.4, 128.2, 128.2, 125.9, 125.1, 121.5, 120.8, 119.9 ppm. HRMS (ESI)  $m/z$ : calcd for  $\text{C}_{33}\text{H}_{23}\text{N}_2^+$  ( $[\text{M}-\text{BF}_4^-]^+$ ) 447.1861, found 447.1861.

## IX. References

- [1] a) L. Zhu, L. Cheng, Y. Zhang, R. Xie, J. You, *J. Org. Chem.* **2007**, *72*, 2737; b) L. Zhu, P. Guo, G. Li, J. Lan, R. Xie, J. You, *J. Org. Chem.* **2007**, *72*, 8535; c) L. Zhu, G. Li, L. Luo, P. Guo, J. Lan, J. You, *J. Org. Chem.* **2009**, *74*, 2200; d) H. Zhang, Q. Cai, D. Ma, *J. Org. Chem.* **2005**, *70*, 5164.
- [2] H. G. O. Becker, G. Hoffmann, K. M. Gwan, L. Knüpfer, *J. Prakt. Chem.* **1988**, *330*, 325.
- [3] C.-Y. Chen, W.-P. Hu, P.-C. Yan, G. C. Senadi, J.-J. Wang, *Org. Lett.* **2013**, *15*, 6116.
- [4] M. Bielawski, D. Aili, B. Olofsson, *J. Org. Chem.* **2008**, *73*, 4602.
- [5] M. Zhu, N. Jalalian, B. Olofsson, *Synlett* **2008**, *4*, 592.
- [6] M. Bielawski, M. Zhu, B. Olofsson, *Adv. Synth. Catal.* **2007**, *349*, 2610.
- [7] Q. Y. Toh, A. McNally, S. Vera, N. Erdmann, M. J. Gaunt, *J. Am. Chem. Soc.* **2013**, *135*, 3772.
- [8] C. J. Teskey, S. M. A. Sohel, D. L. Bunting, S. G. Modha, M. F. Greaney, *Angew. Chem. Int. Ed.* **2017**, *56*, 5263.
- [9] W. Liu, K. Bendorf, M. Proetto, U. Abram, A. Hagenbach, R. Gust, *J. Med. Chem.* **2011**, *54*, 8605.
- [10] D. Tapu, C. Owens, D. VanDerveer, K. Gwaltney, *Organometallics.* **2009**, *28*, 270.
- [11] T. Lv, Z. Wang, J. You, J. Lan, G. Gao, *J. Org. Chem.* **2013**, *78*, 5723.
- [12] S. Li, J. Tang, Y. Zhao, R. Jiang, T. Wang, G. Gao, J. You, *Chem. Commun.* **2017**, *53*, 3489.
- [13] S. K. Pawar, M.-C. Yang, M.-D. Su, R.-S. Liu, *Angew. Chem. Int. Ed.* **2017**, *56*, 5035.

## X. Copies of $^1\text{H}$ , $^{13}\text{C}$ and $^{19}\text{F}$ NMR spectra

$^1\text{H}$  NMR (400 MHz, DMSO-*d*<sub>6</sub>) of **3a**

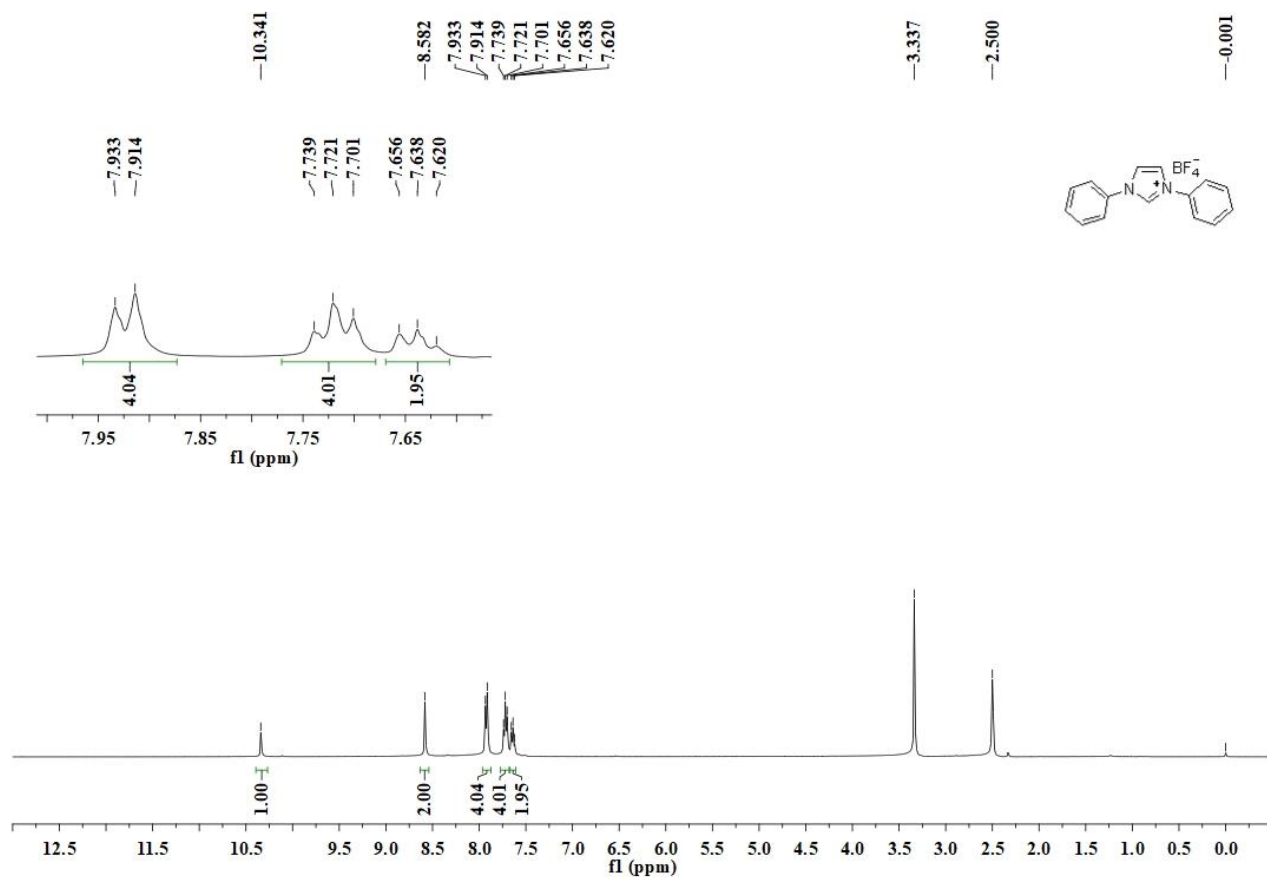

$^1\text{H}$  NMR (500 MHz, DMSO-*d*<sub>6</sub>) of **3a-OTf**

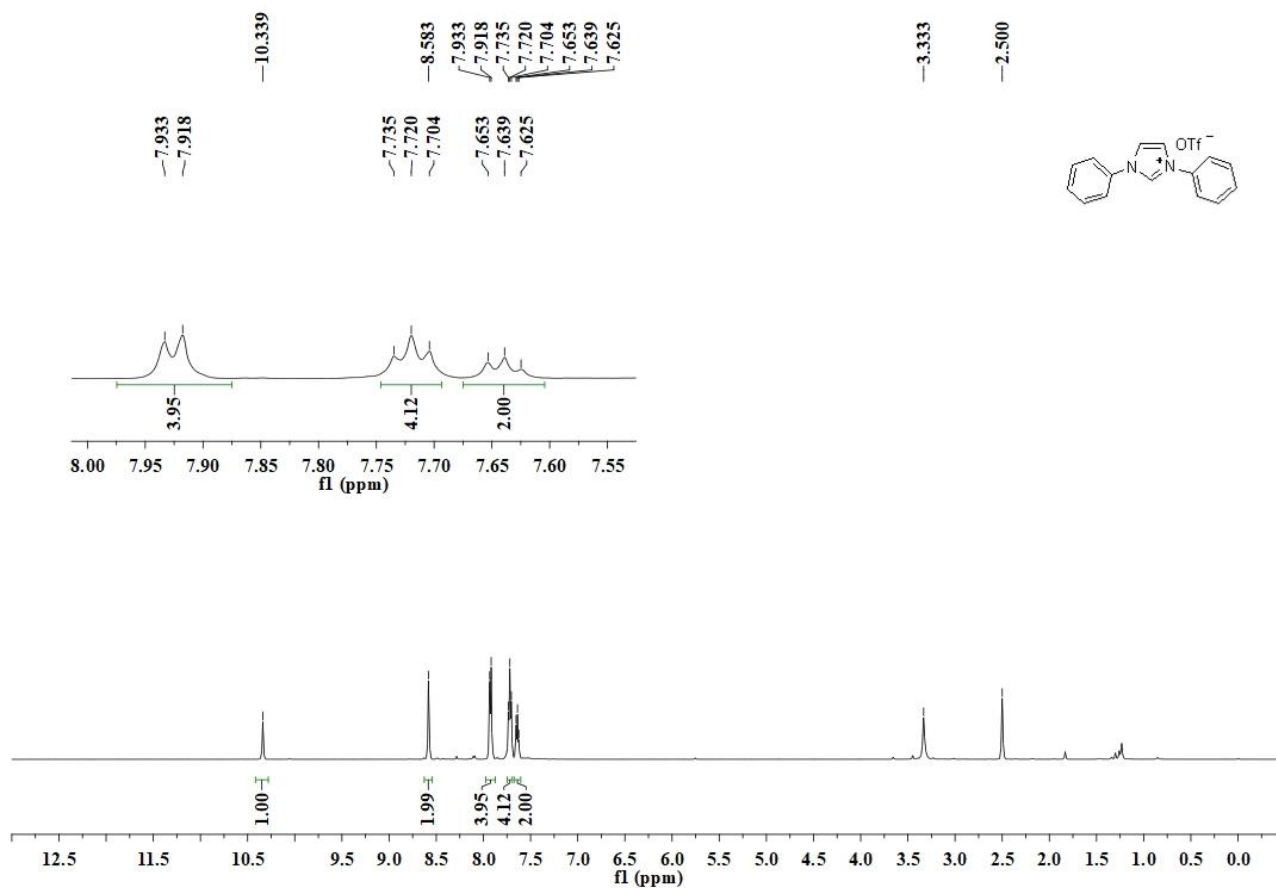

$^{13}\text{C}$  NMR (126 MHz, DMSO-*d*<sub>6</sub>) of **3a-OTf**

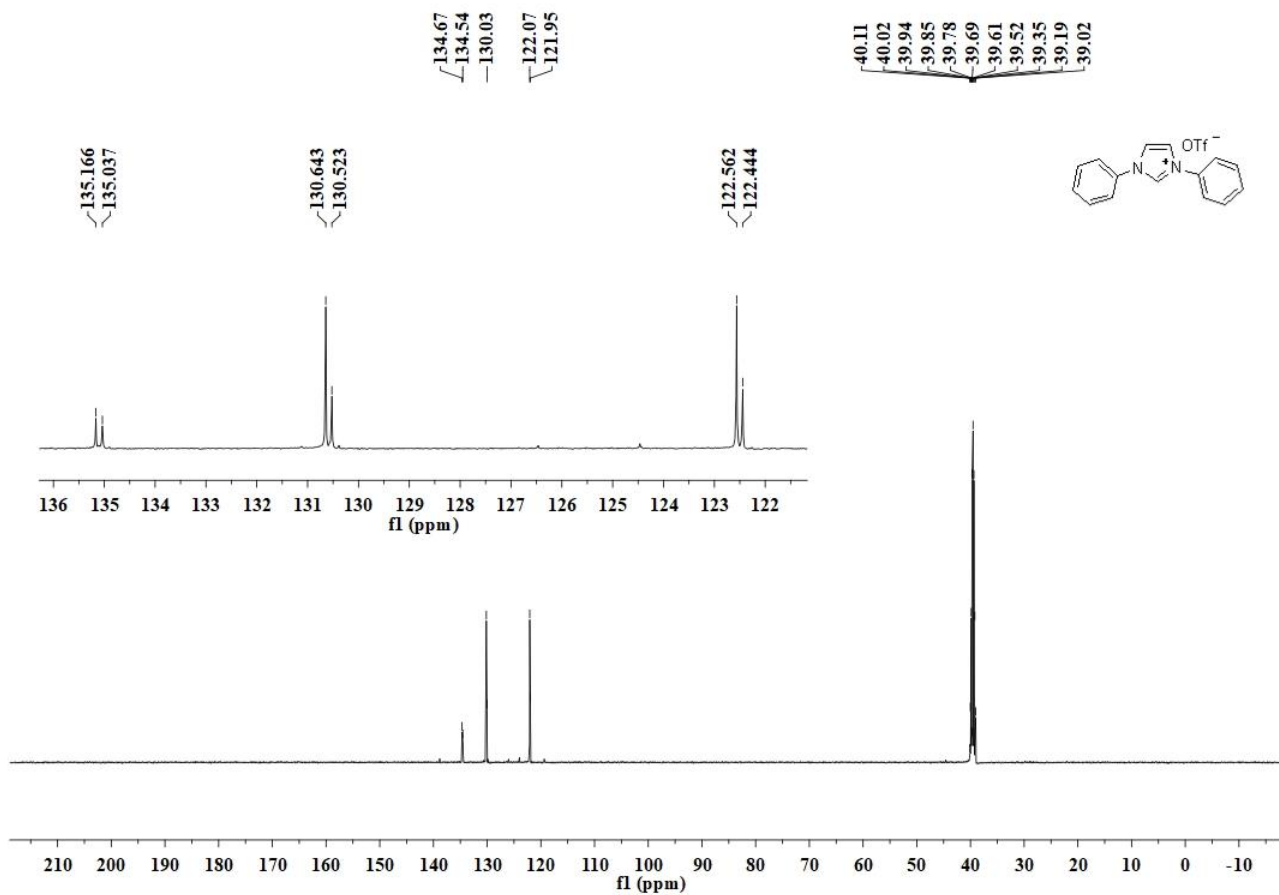

$^1\text{H}$  NMR (400 MHz, DMSO-*d*<sub>6</sub>) of **3d**

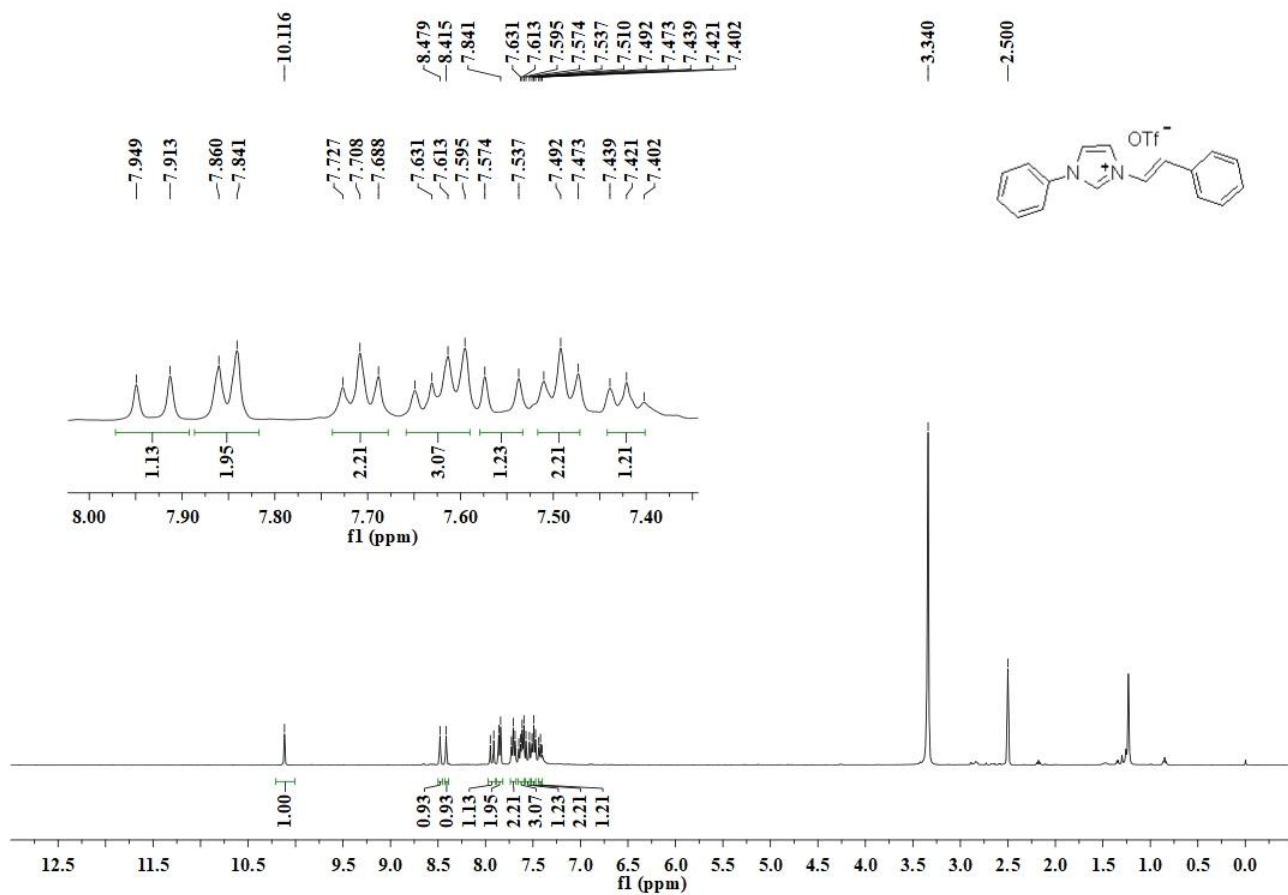

$^{13}\text{C}$  NMR (101 MHz, DMSO-*d*<sub>6</sub>) of **3d**

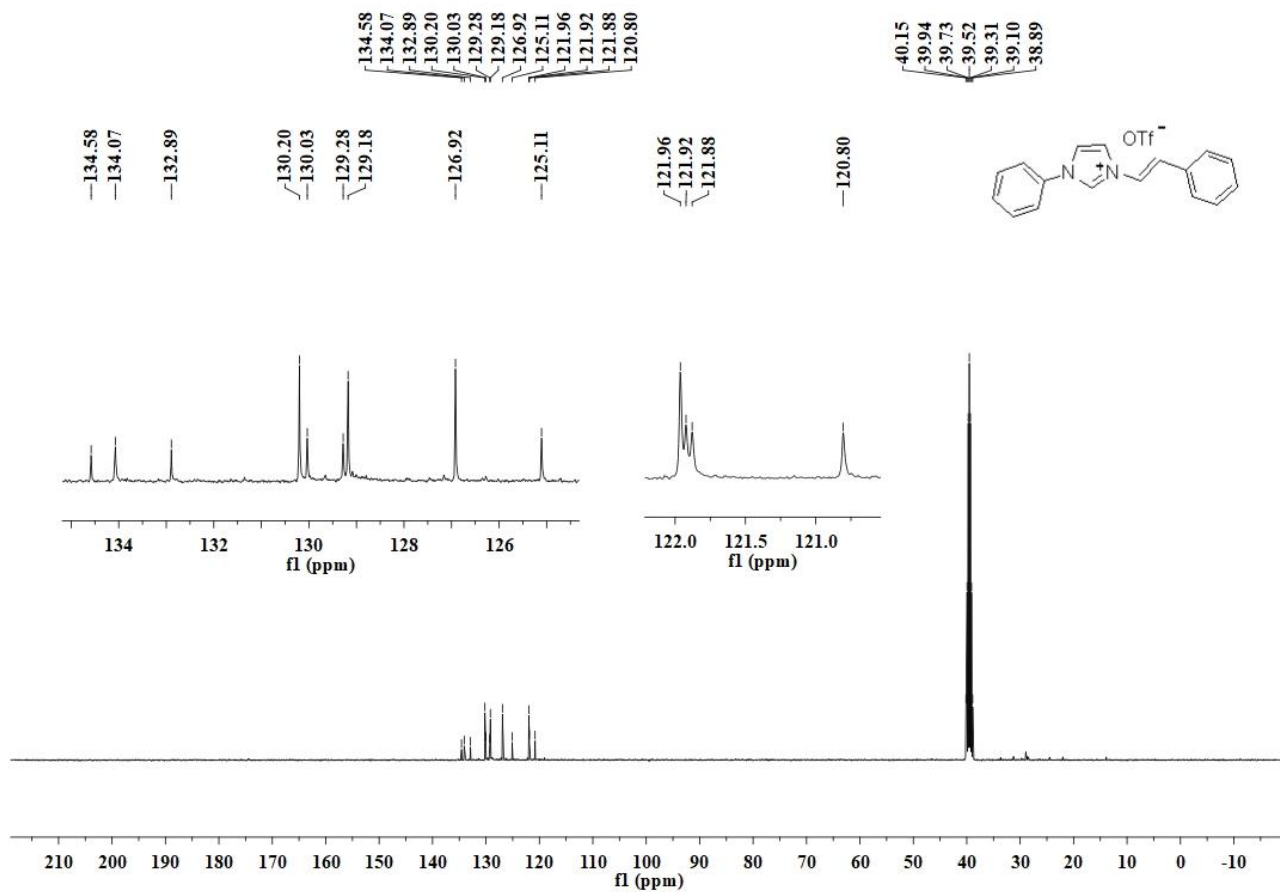

$^1\text{H}$  NMR (400 MHz,  $\text{DMSO-}d_6$ ) of **4a/7a**

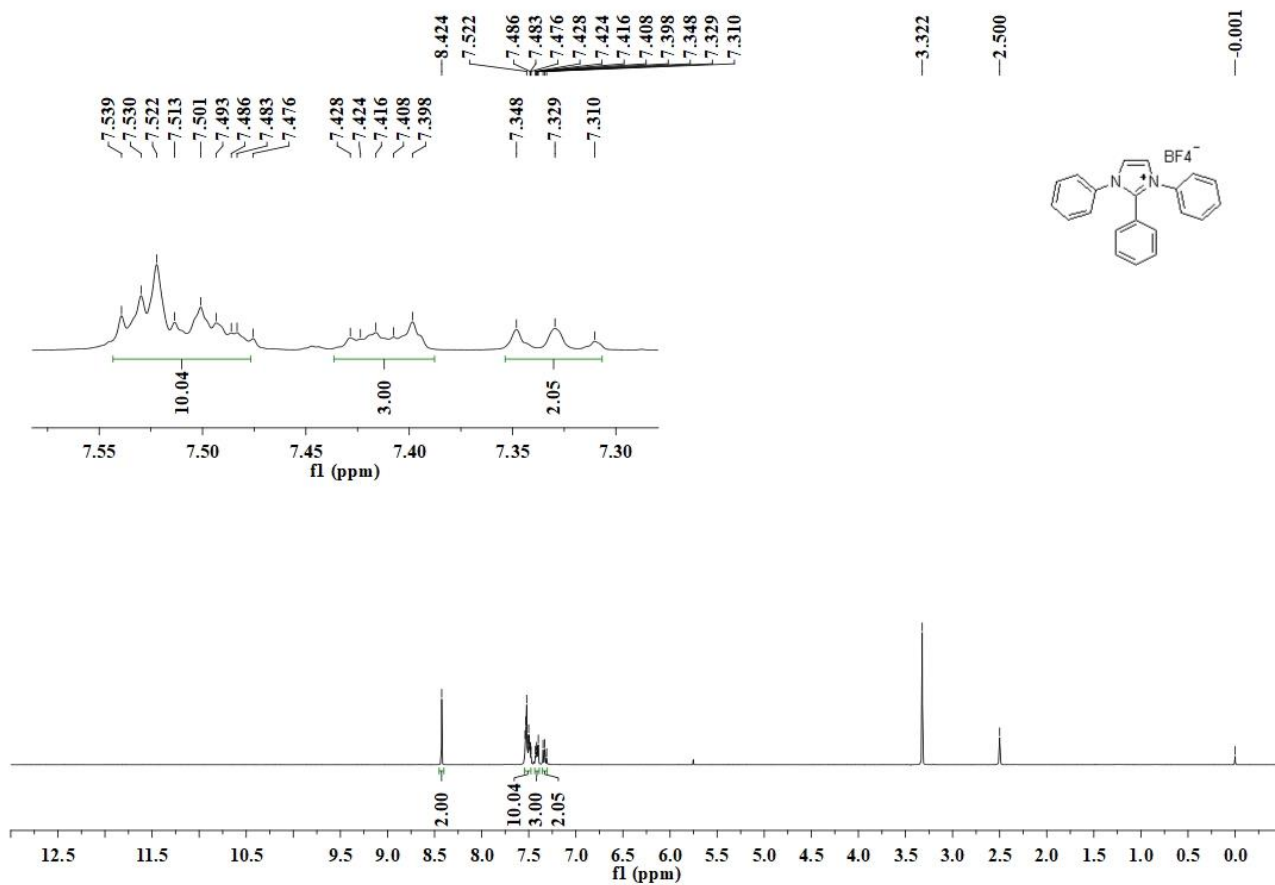

$^{13}\text{C}$  NMR (101 MHz,  $\text{DMSO-}d_6$ ) of **4/7a**

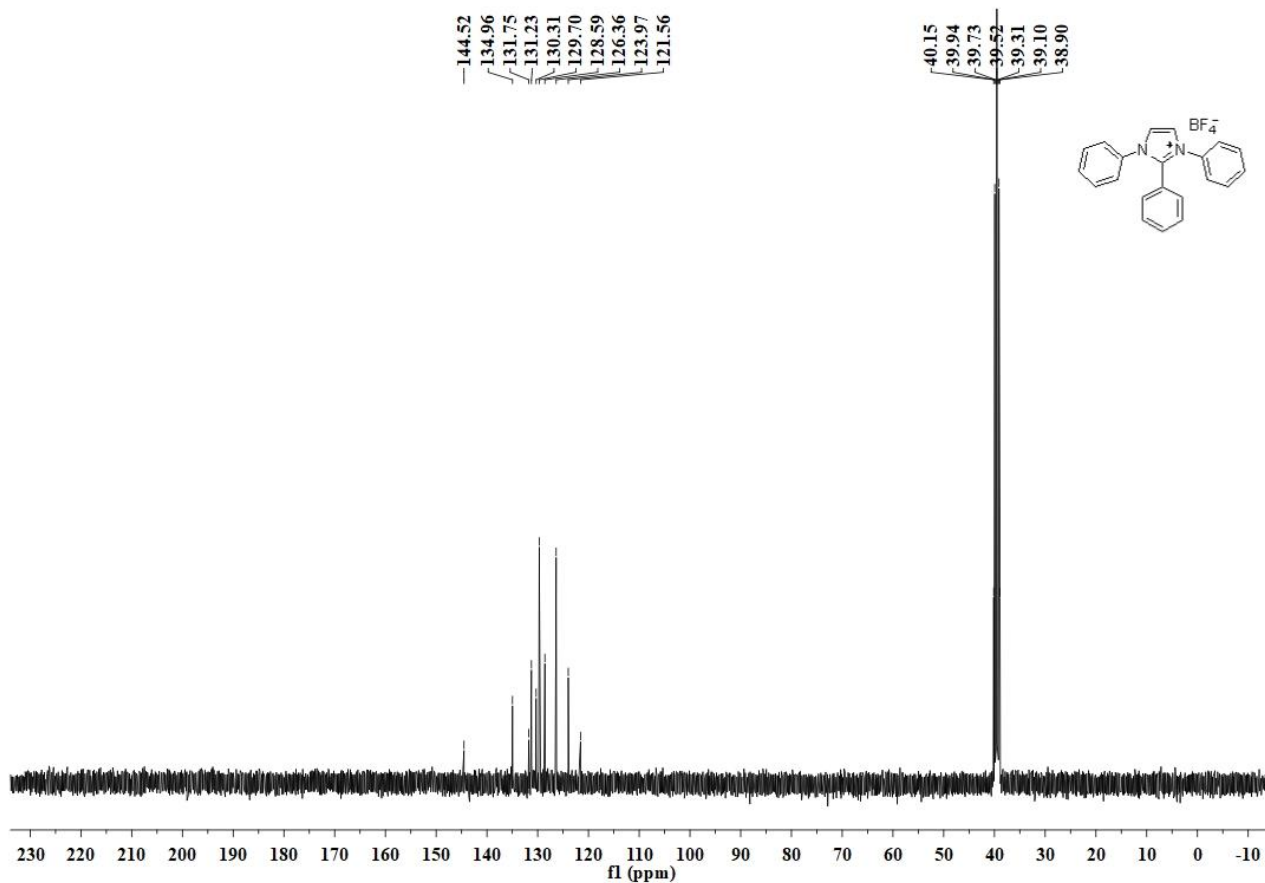



$^{19}\text{F}$  NMR (376 MHz, DMSO-*d*<sub>6</sub>) of **4a/7a**

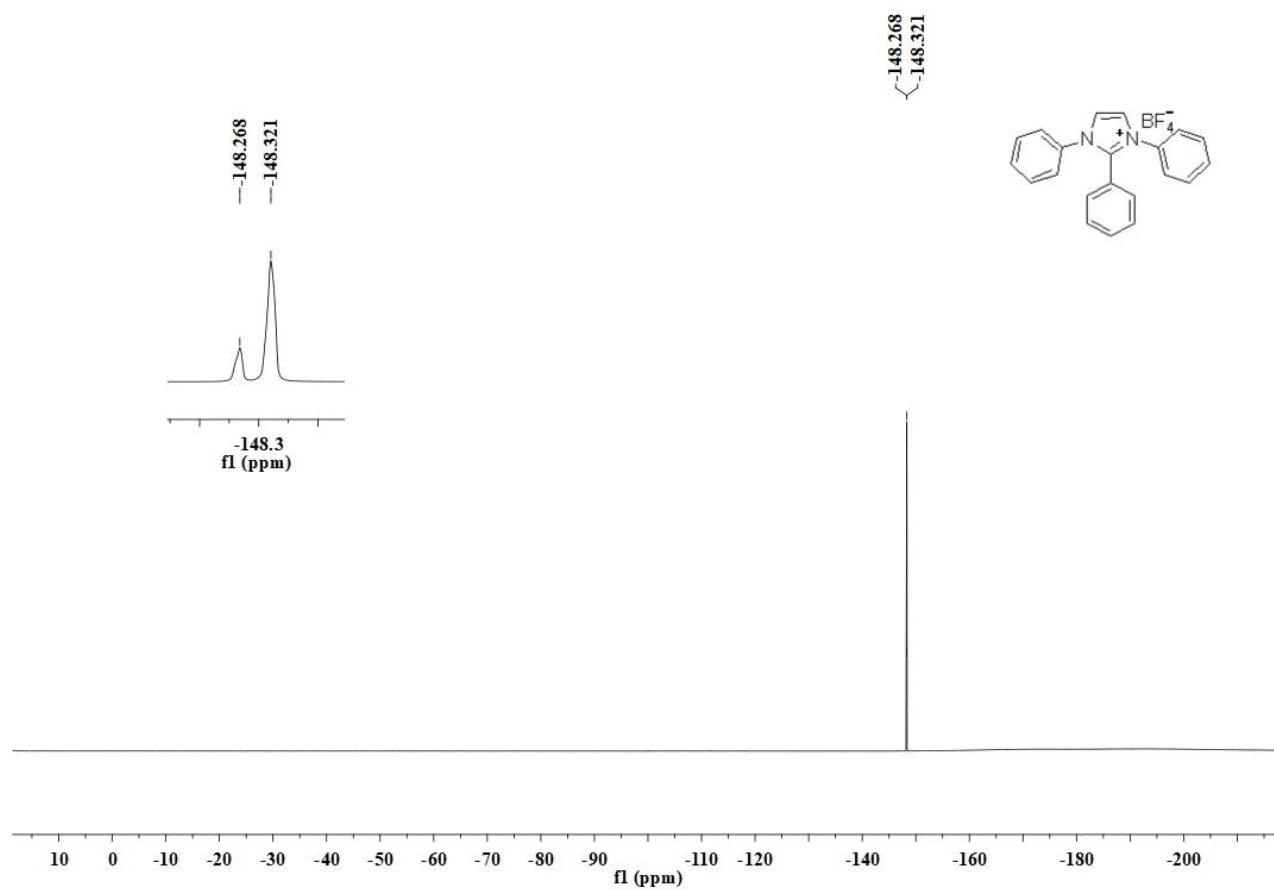

<sup>1</sup>H NMR (400 MHz, DMSO-*d*<sub>6</sub>) of **4a-OTf**

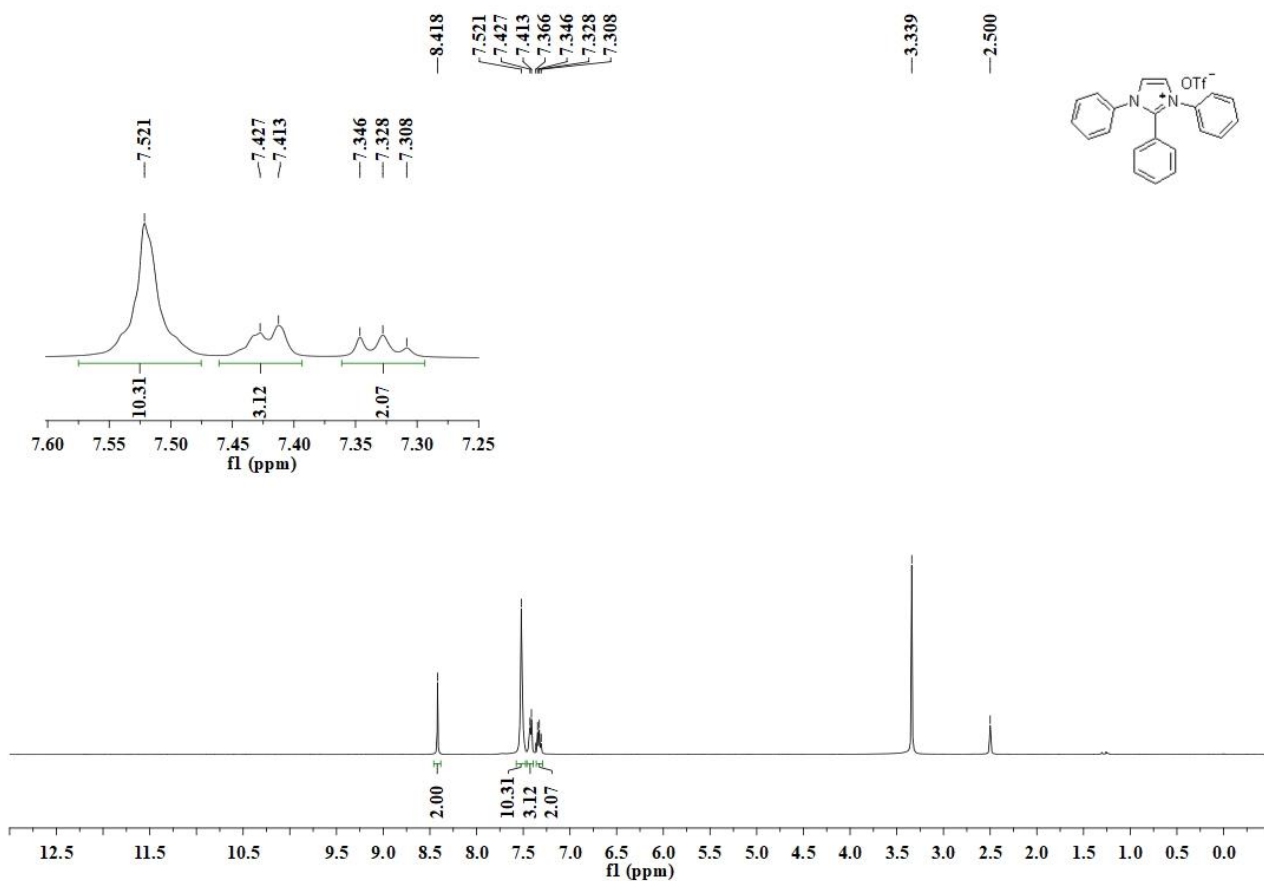

<sup>13</sup>C NMR (101 MHz, DMSO-*d*<sub>6</sub>) of **4a-OTf**

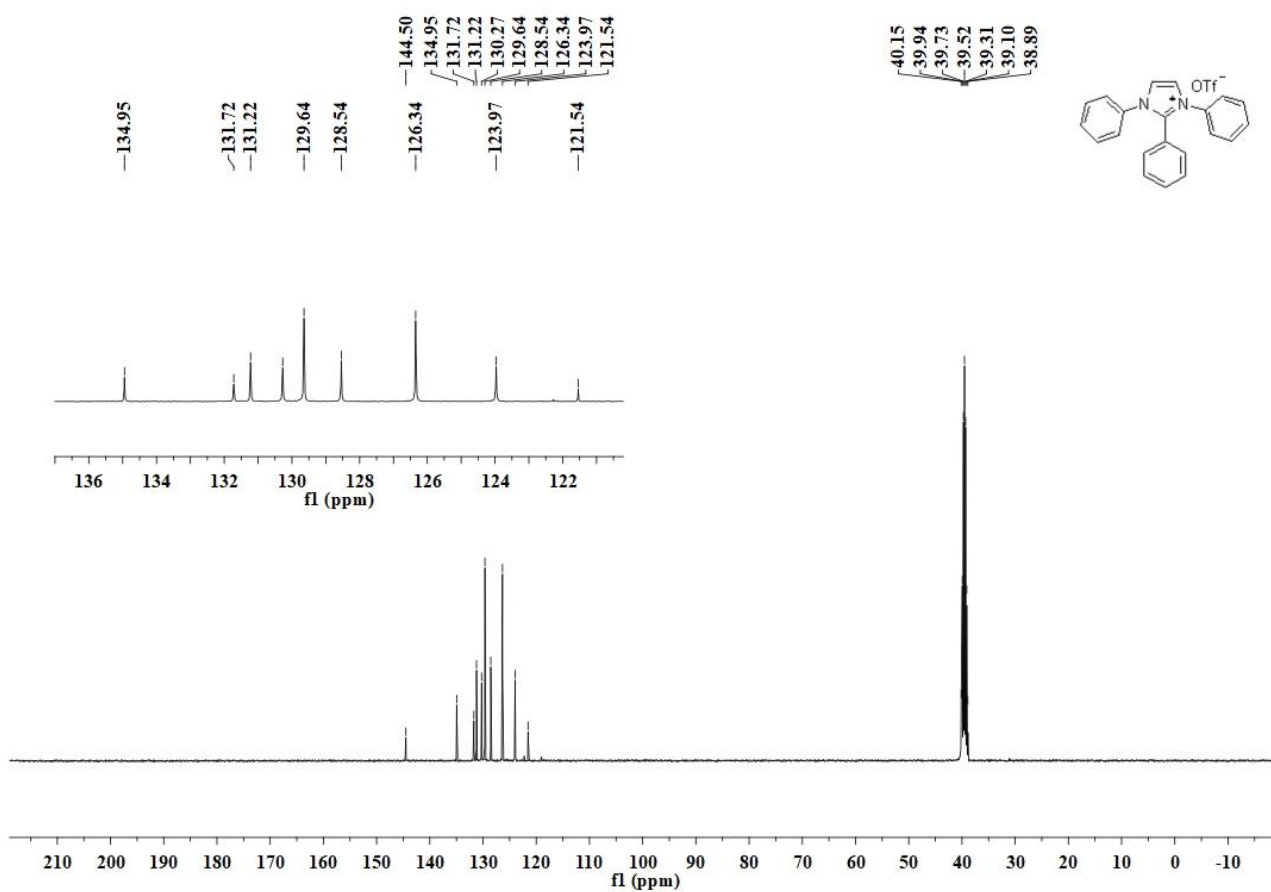

$^{19}\text{F}$  NMR (376 MHz,  $\text{DMSO-}d_6$ ) of **4a-OTf**

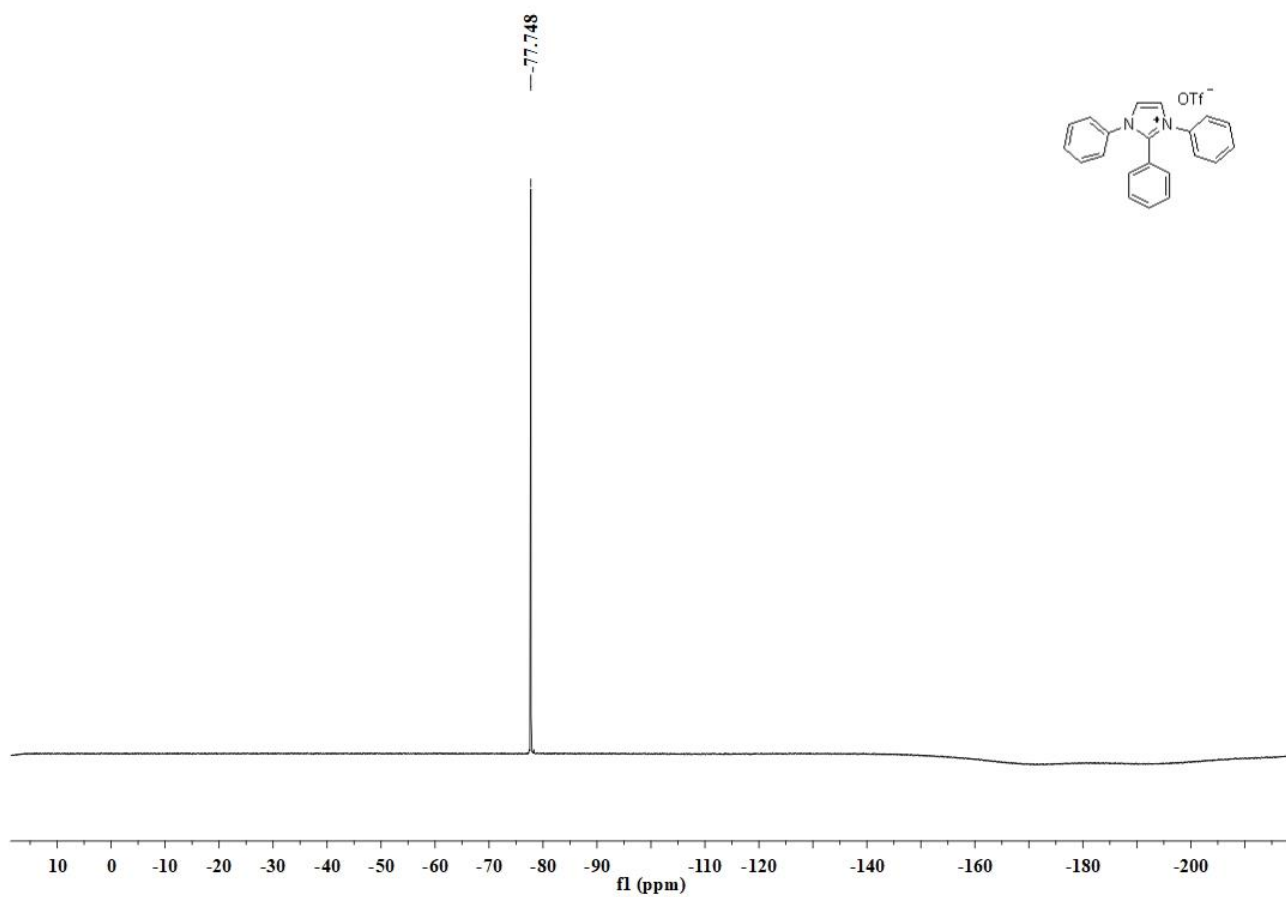

<sup>1</sup>H NMR (400 MHz, CDCl<sub>3</sub>) of **4b**

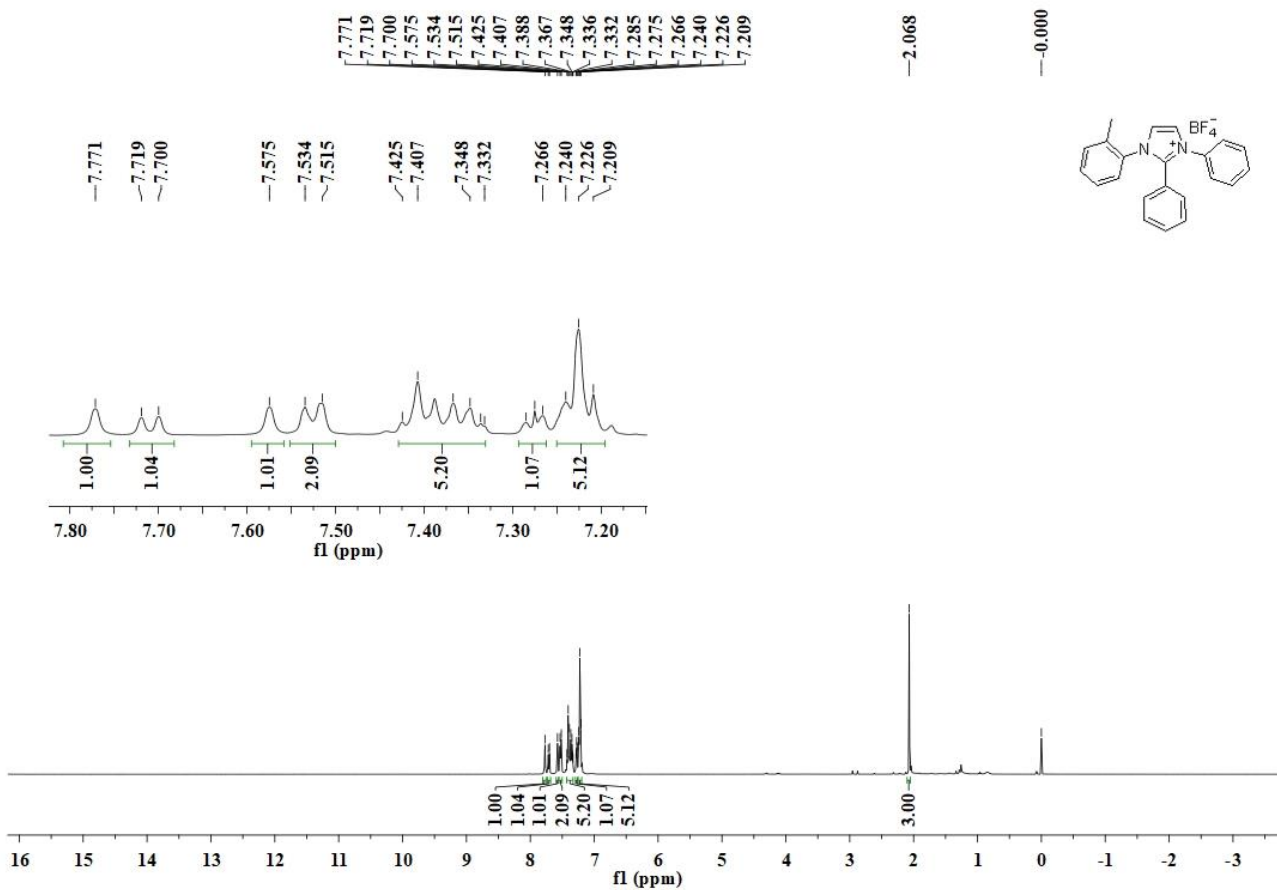

<sup>13</sup>C NMR (101 MHz, CDCl<sub>3</sub>) of **4b**

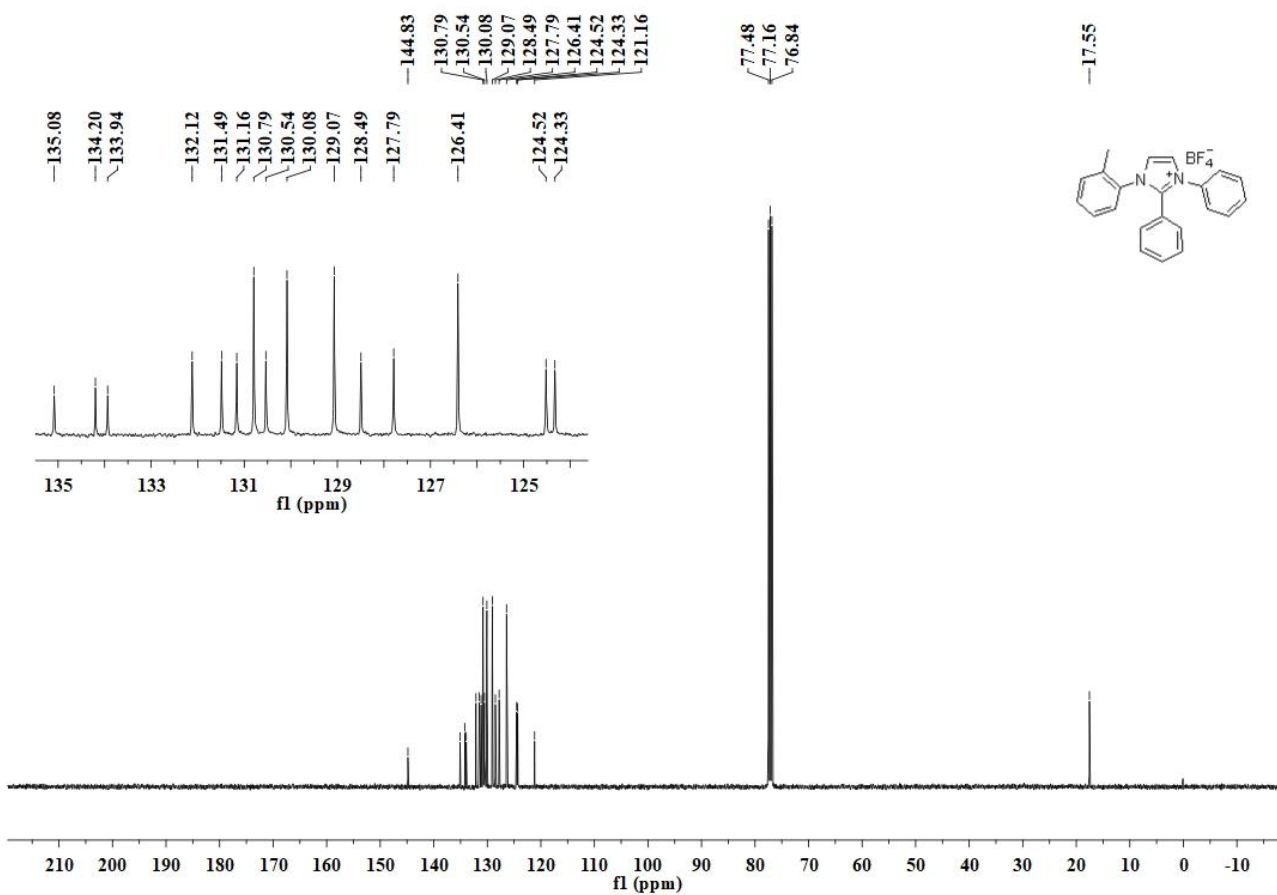

$^1\text{H}$  NMR (400 MHz,  $\text{CDCl}_3$ ) of **4c**

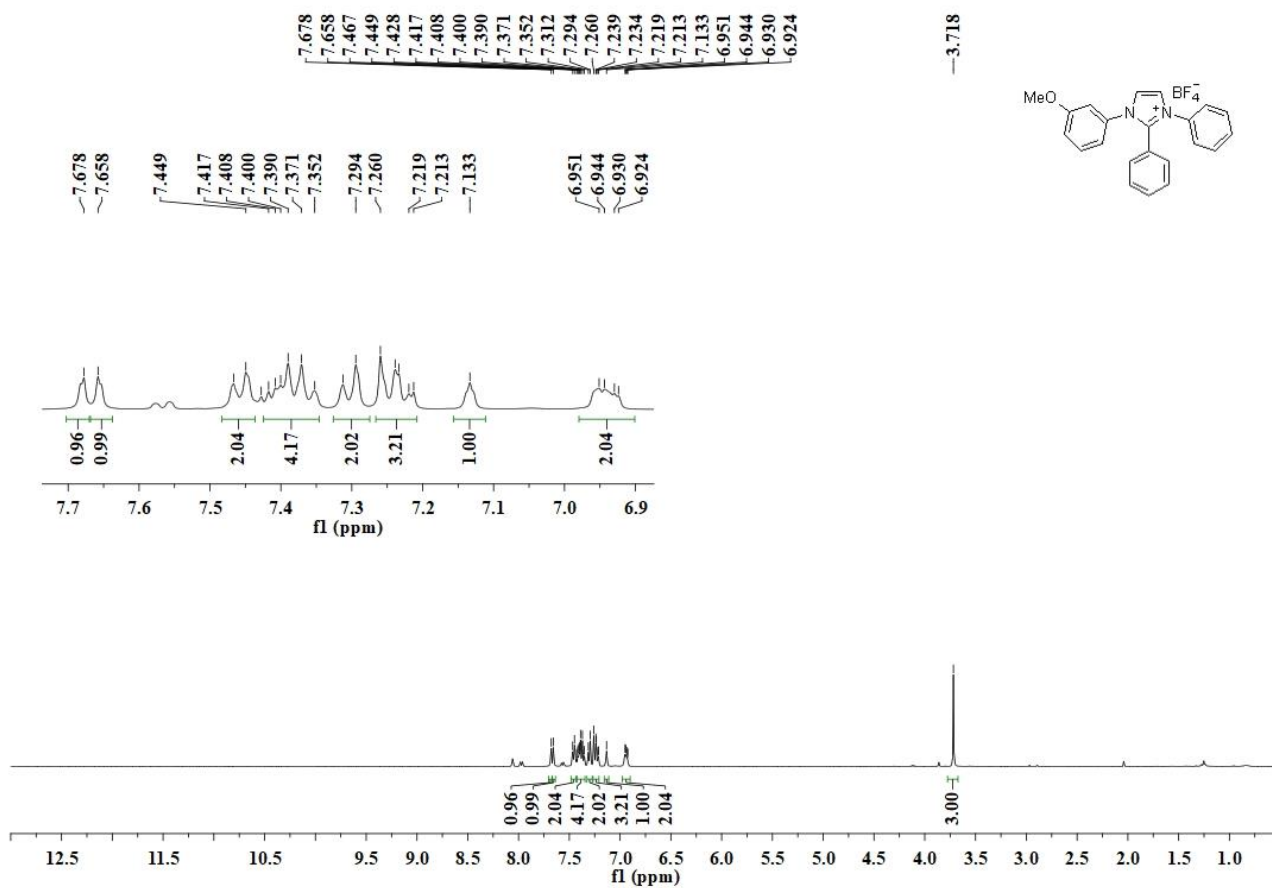

$^{13}\text{C}$  NMR (101 MHz,  $\text{CDCl}_3$ ) of **4c**

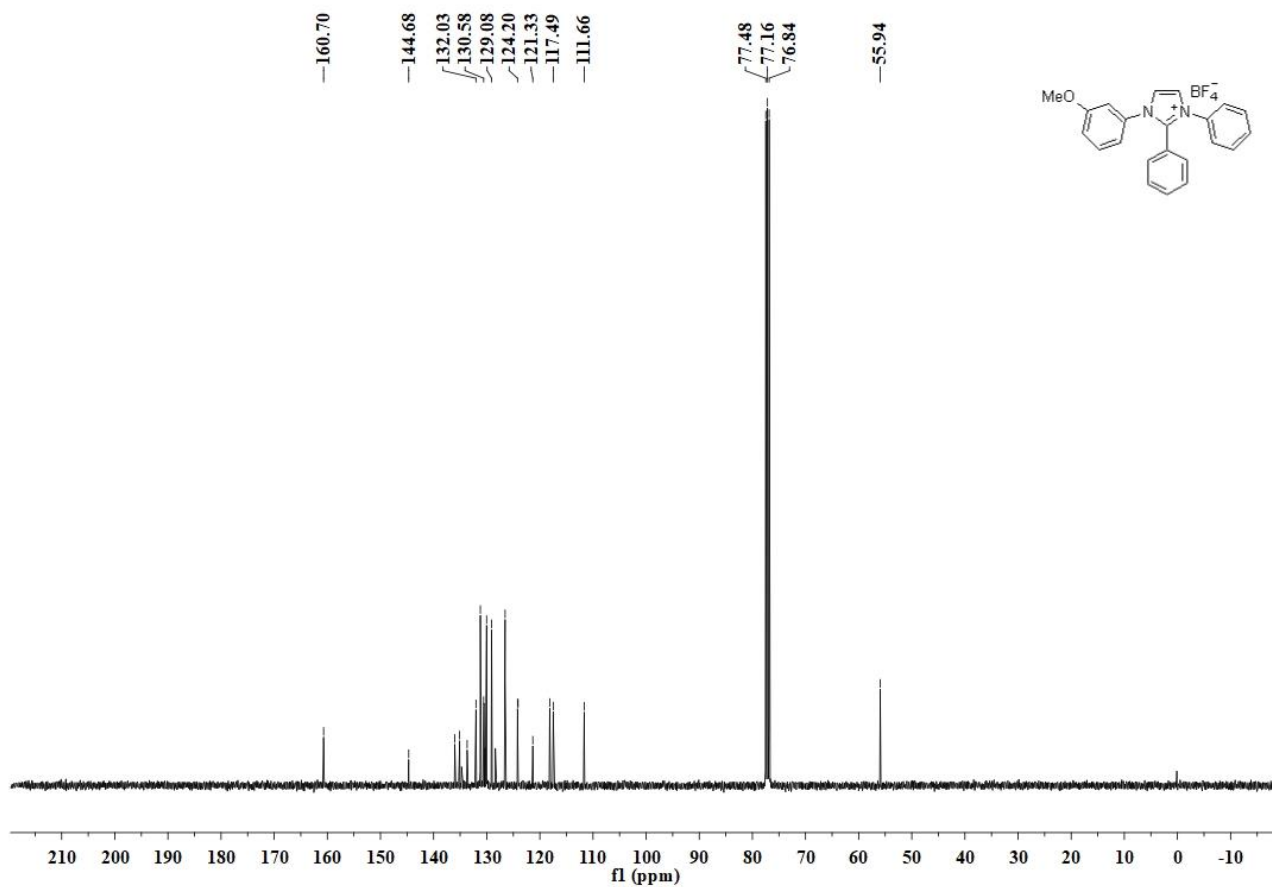

<sup>1</sup>H NMR (400 MHz, CDCl<sub>3</sub>) of **4d**

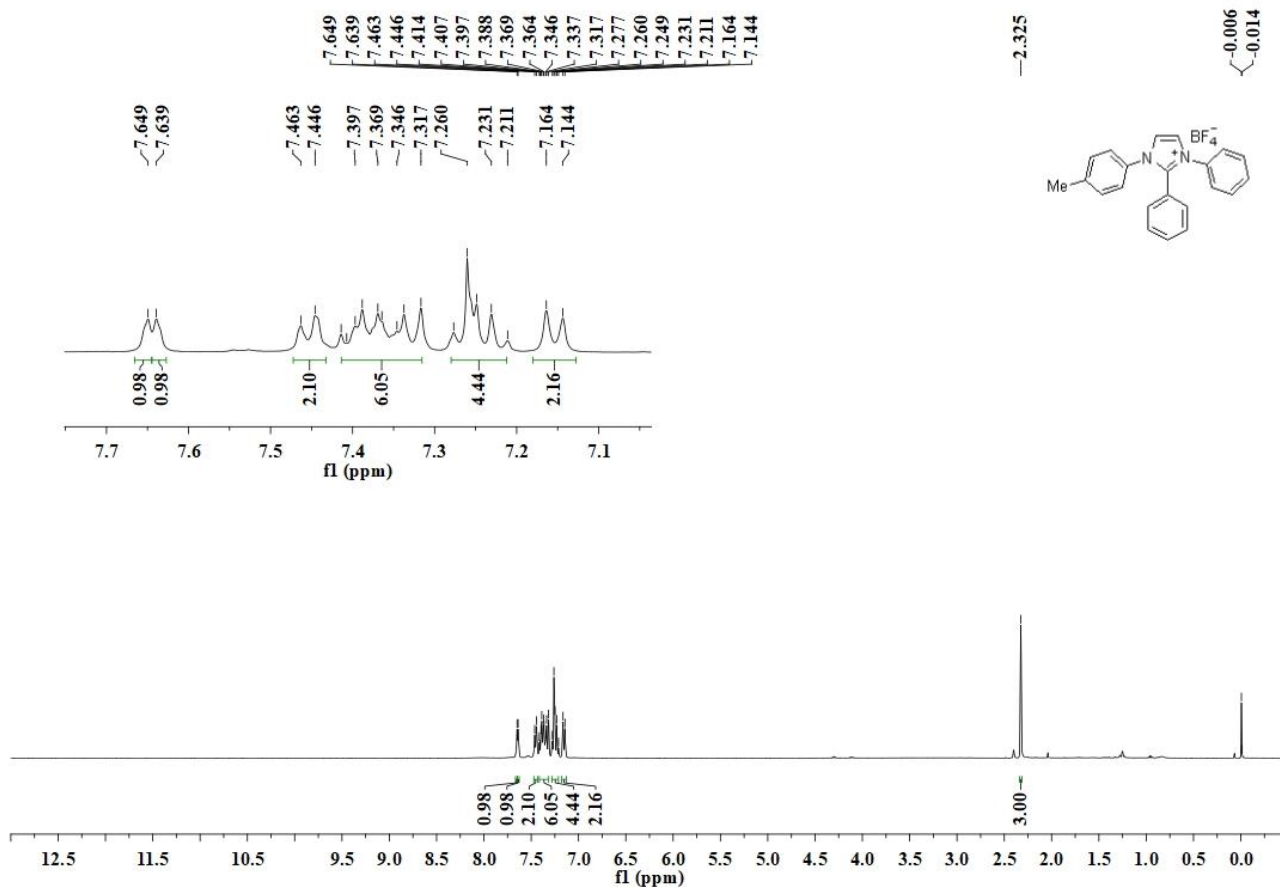

<sup>13</sup>C NMR (101 MHz, CDCl<sub>3</sub>) of **4d**

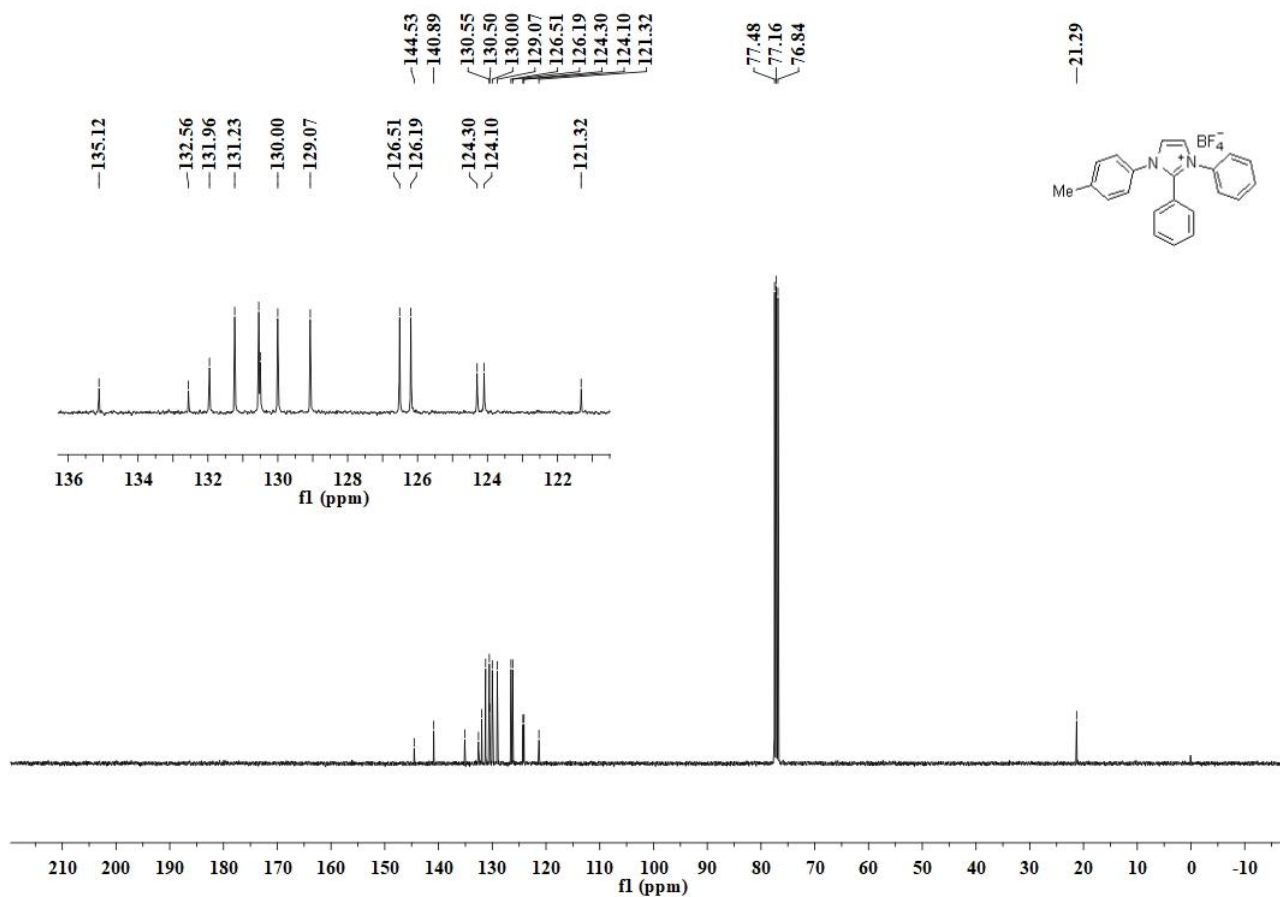

$^1\text{H}$  NMR (400 MHz,  $\text{CDCl}_3$ ) of **4e**

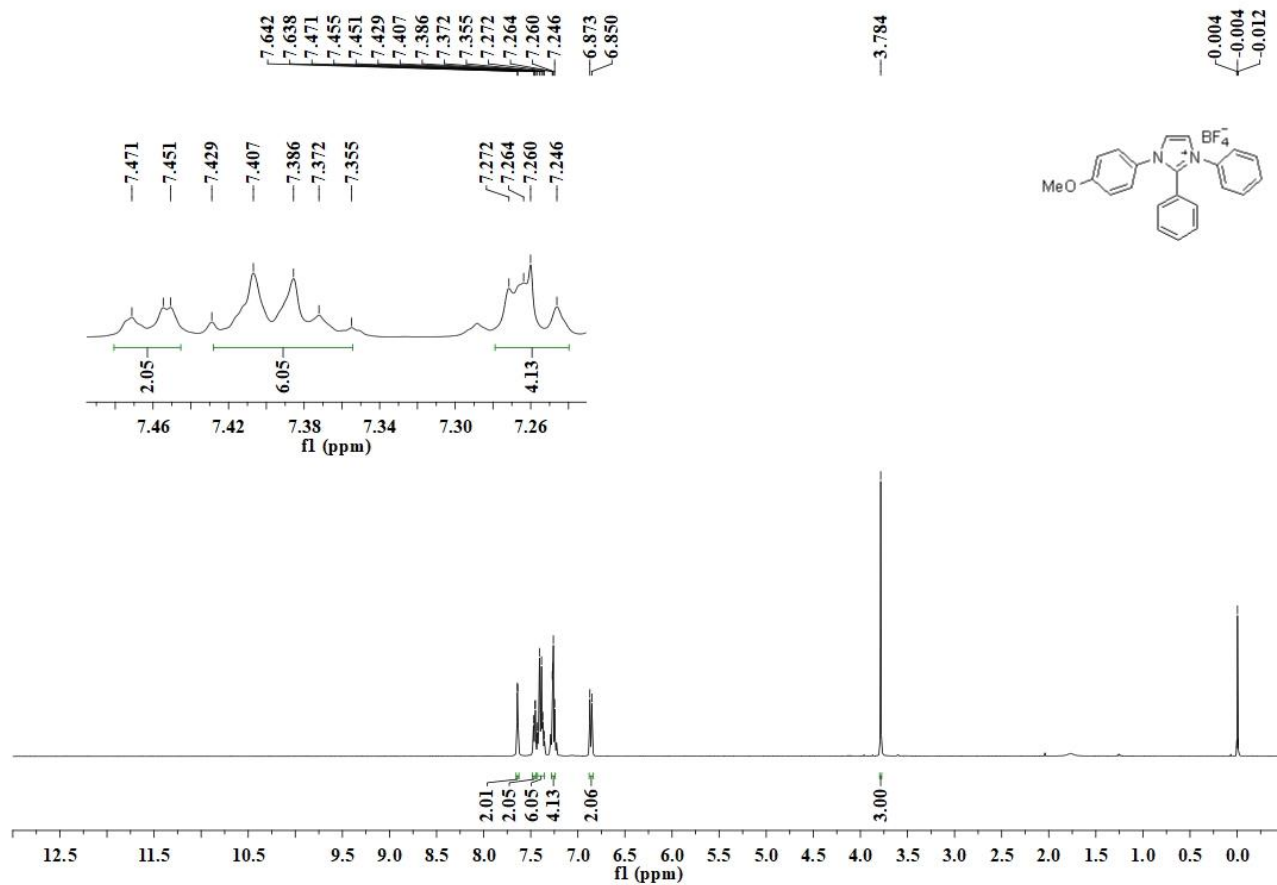

$^{13}\text{C}$  NMR (101 MHz,  $\text{CDCl}_3$ ) of **4e**

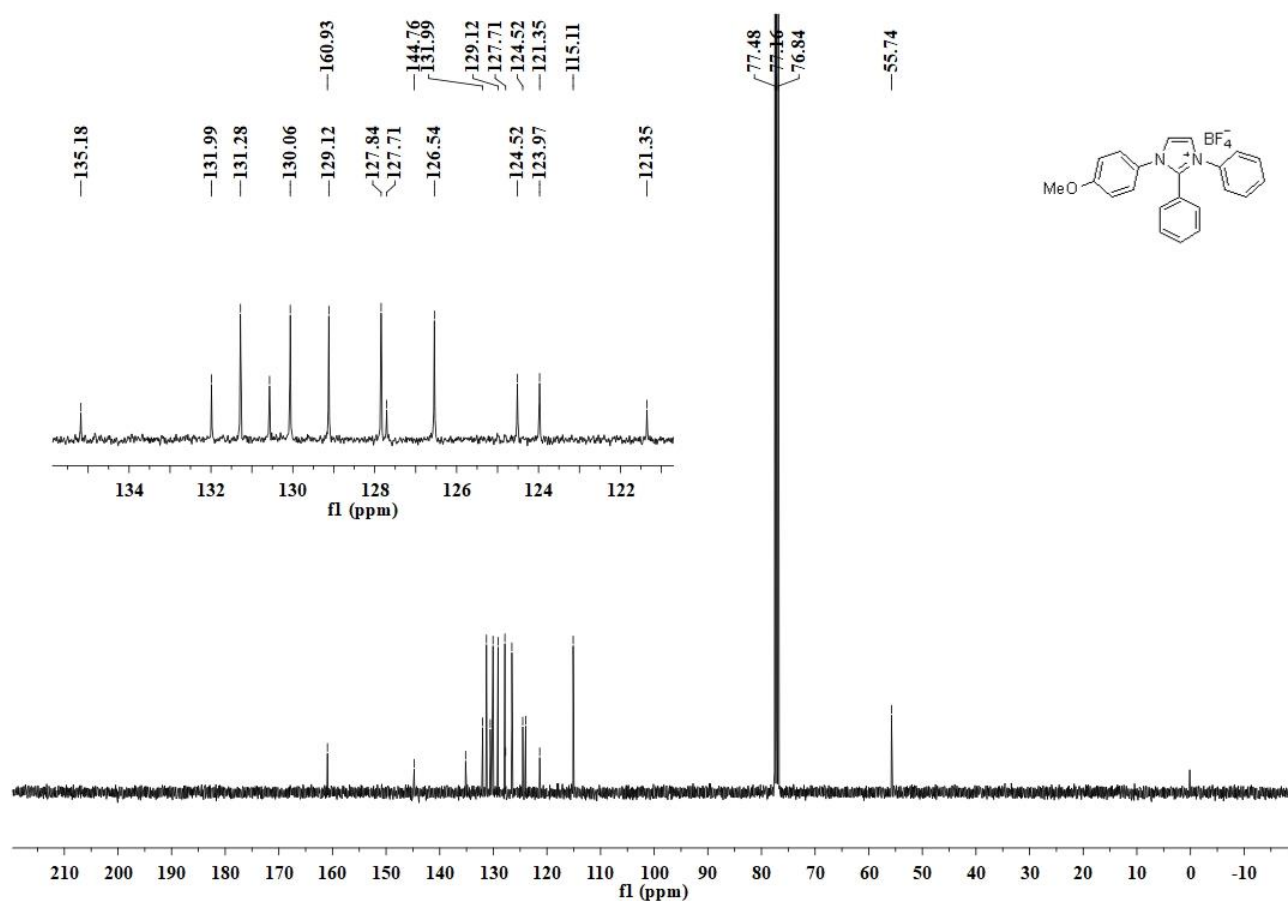

$^1\text{H}$  NMR (400 MHz,  $\text{CDCl}_3$ ) of **4f**

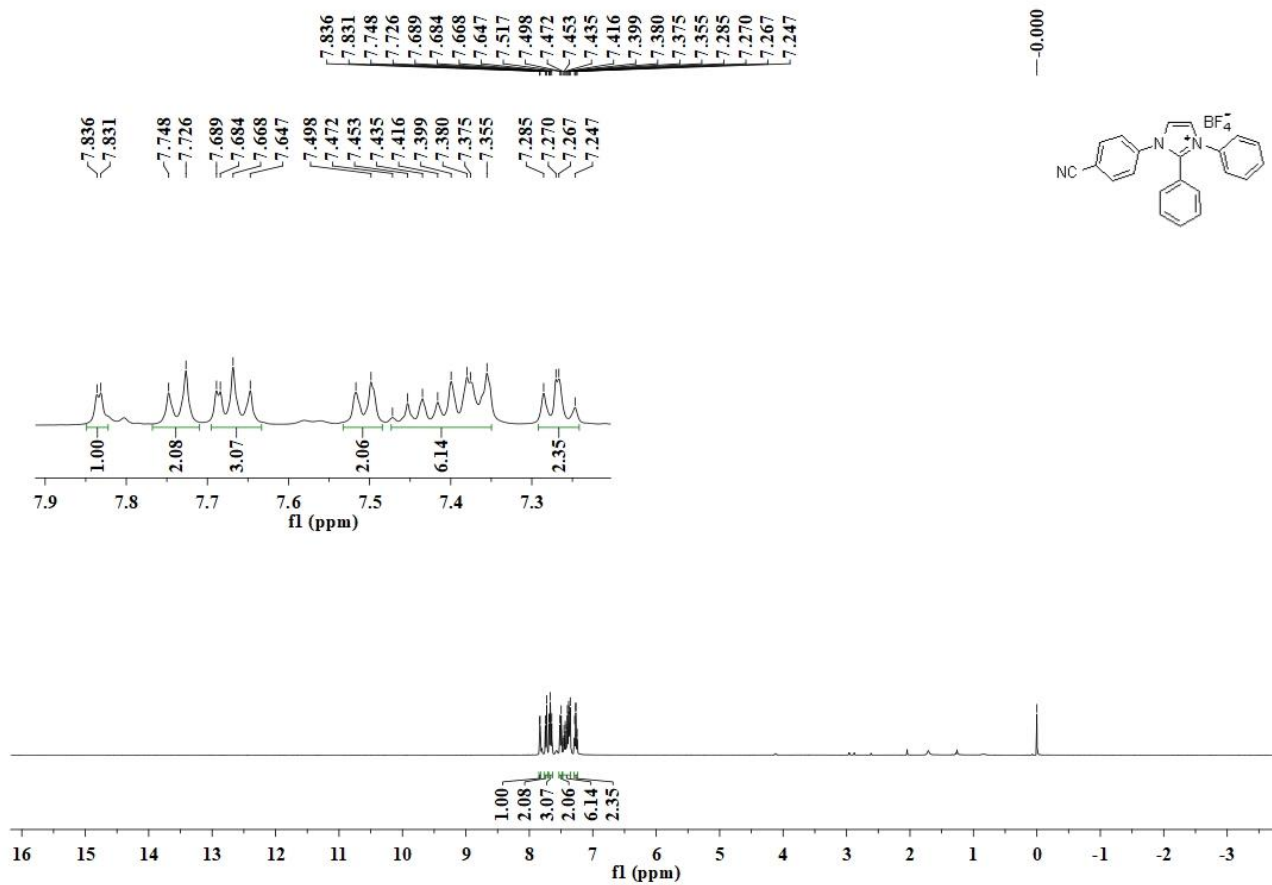

$^{13}\text{C}$  NMR (101 MHz,  $\text{CDCl}_3$ ) of **4f**

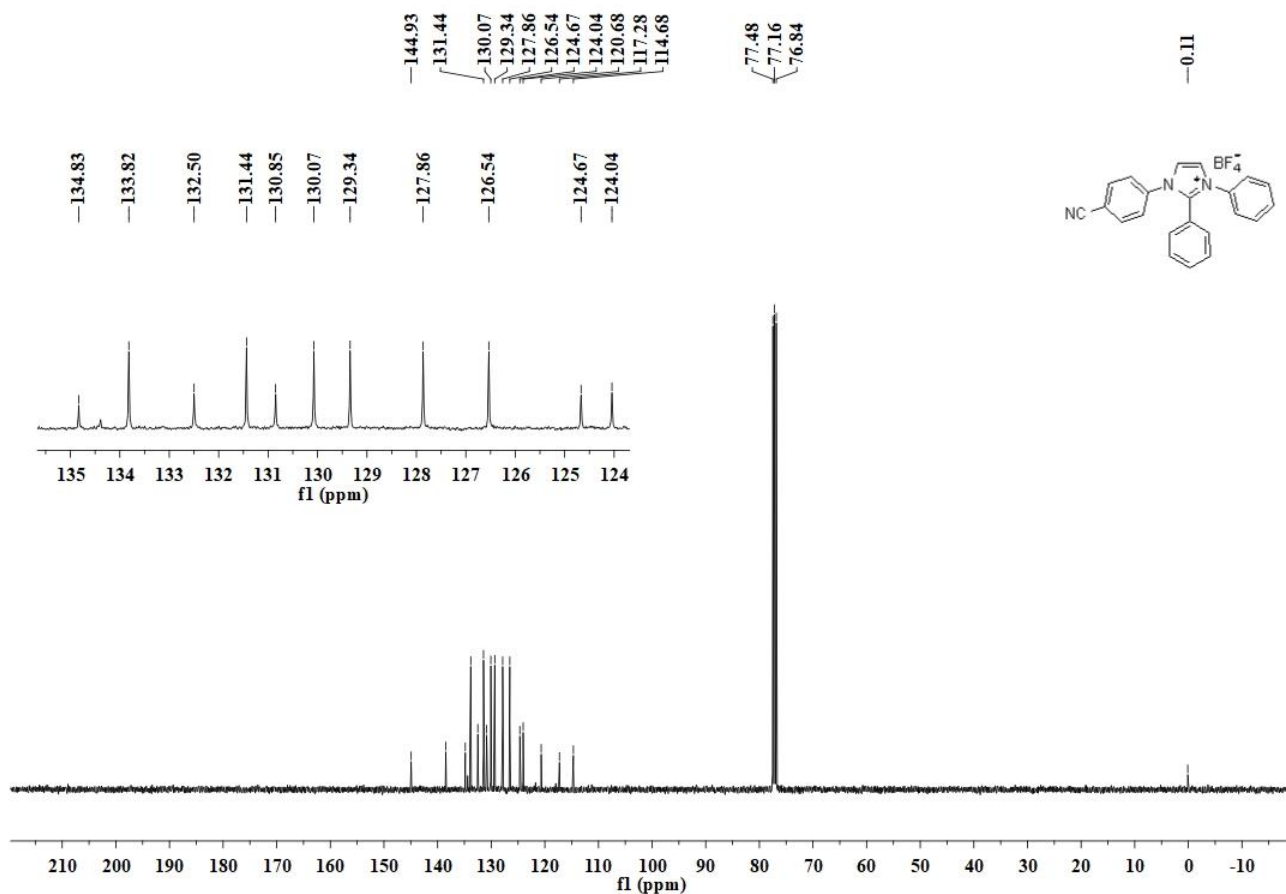



$^1\text{H}$  NMR (500 MHz,  $\text{DMSO-}d_6$ ) of **4g**

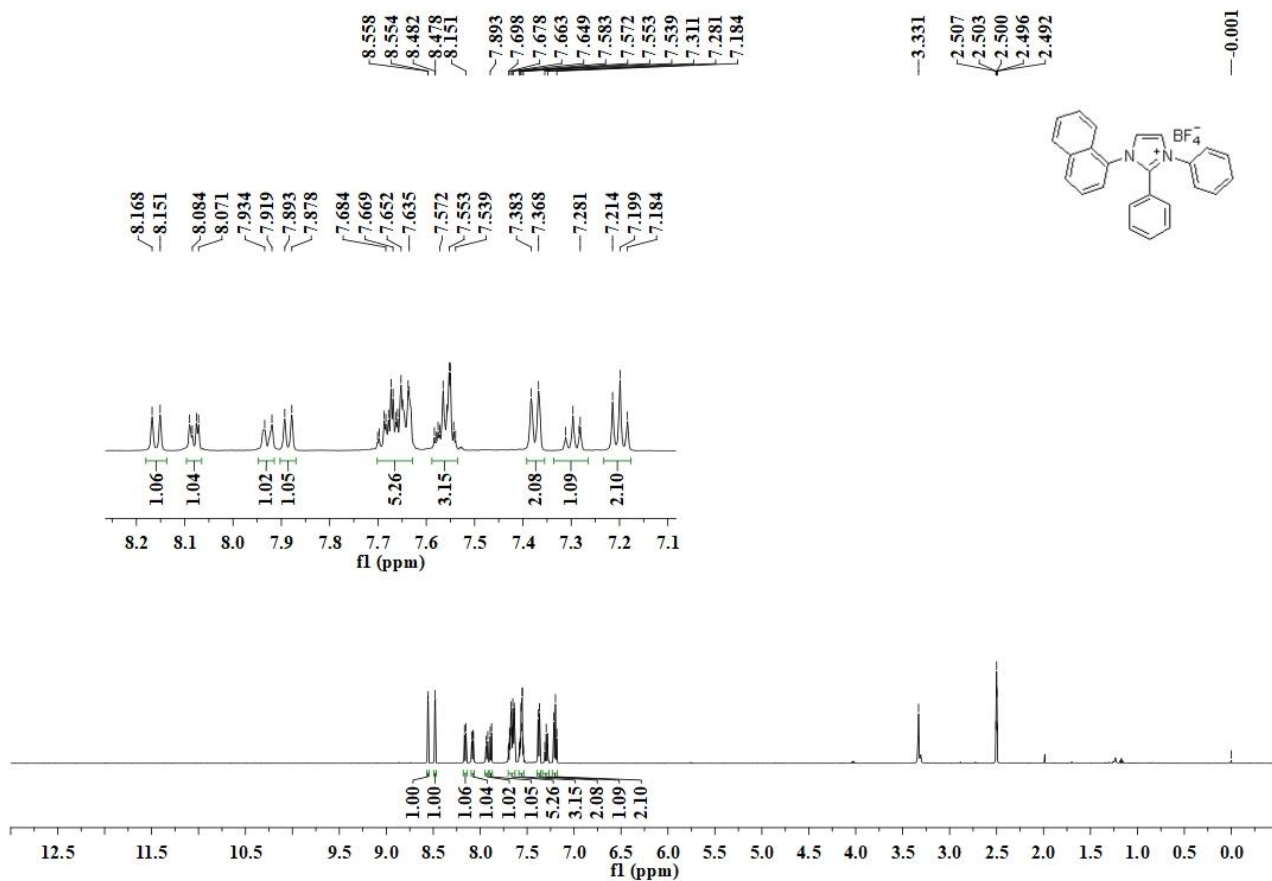

$^{13}\text{C}$  NMR (126 MHz,  $\text{DMSO-}d_6$ ) of **4g**

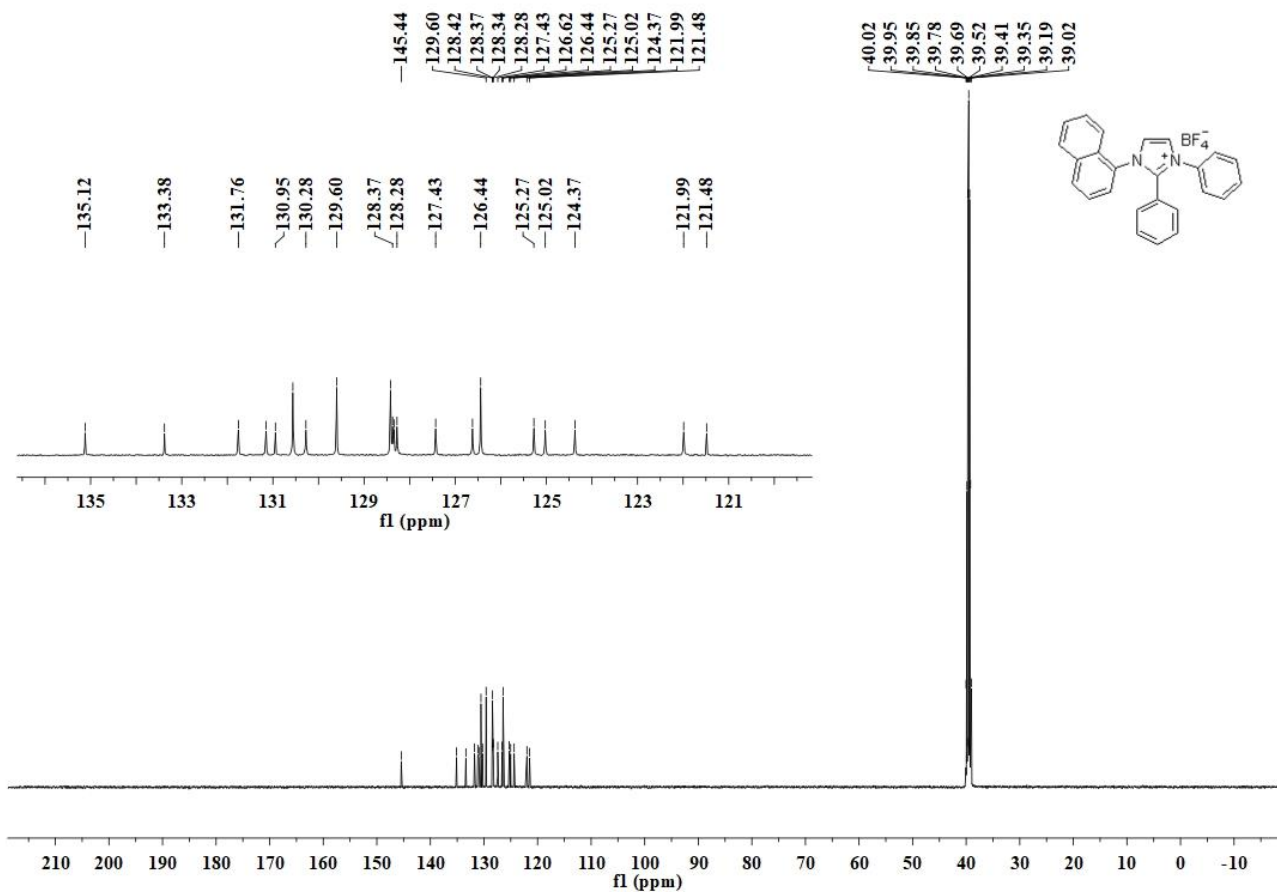

$^1\text{H}$  NMR (500 MHz,  $\text{CDCl}_3$ ) of **4h**

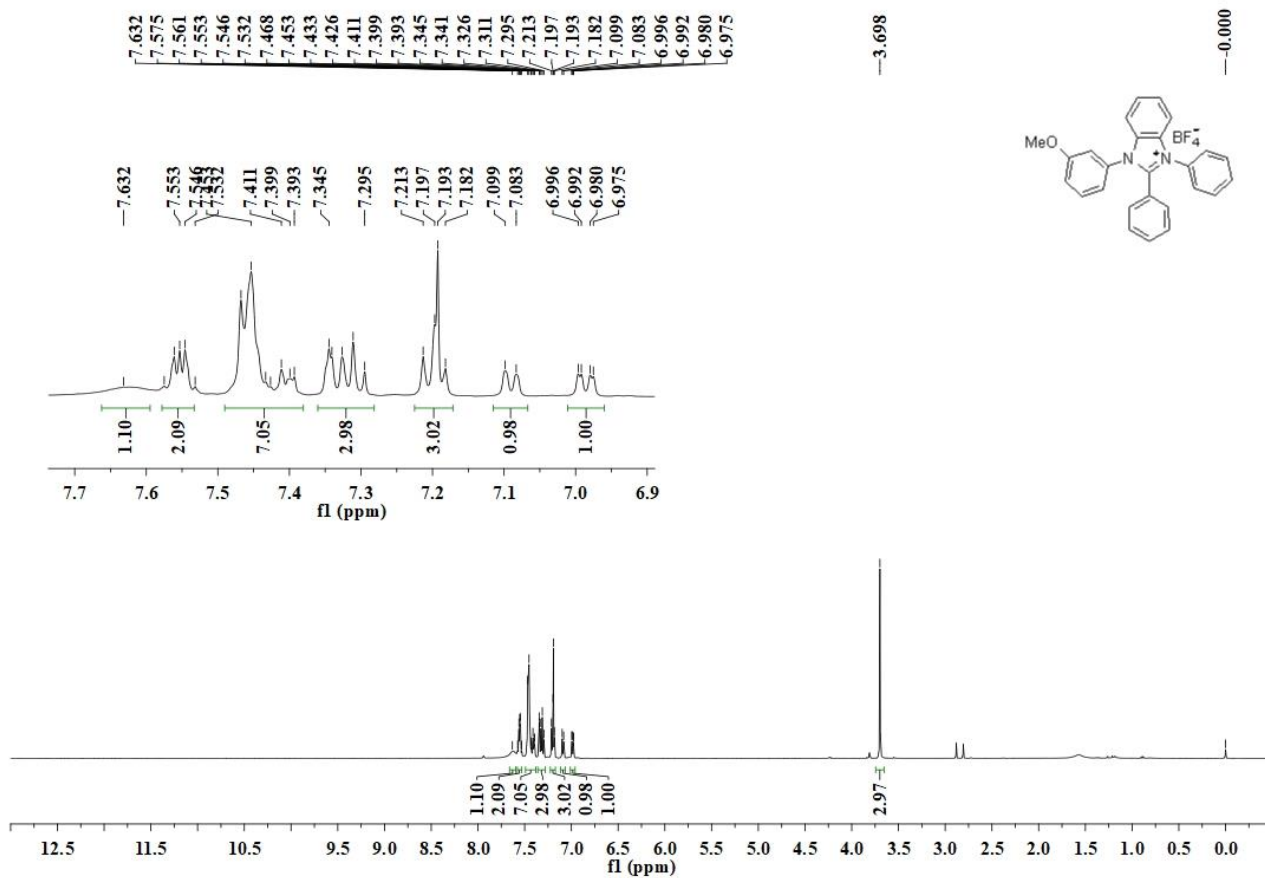

$^{13}\text{C}$  NMR (126 MHz,  $\text{CDCl}_3$ ) of **4h**

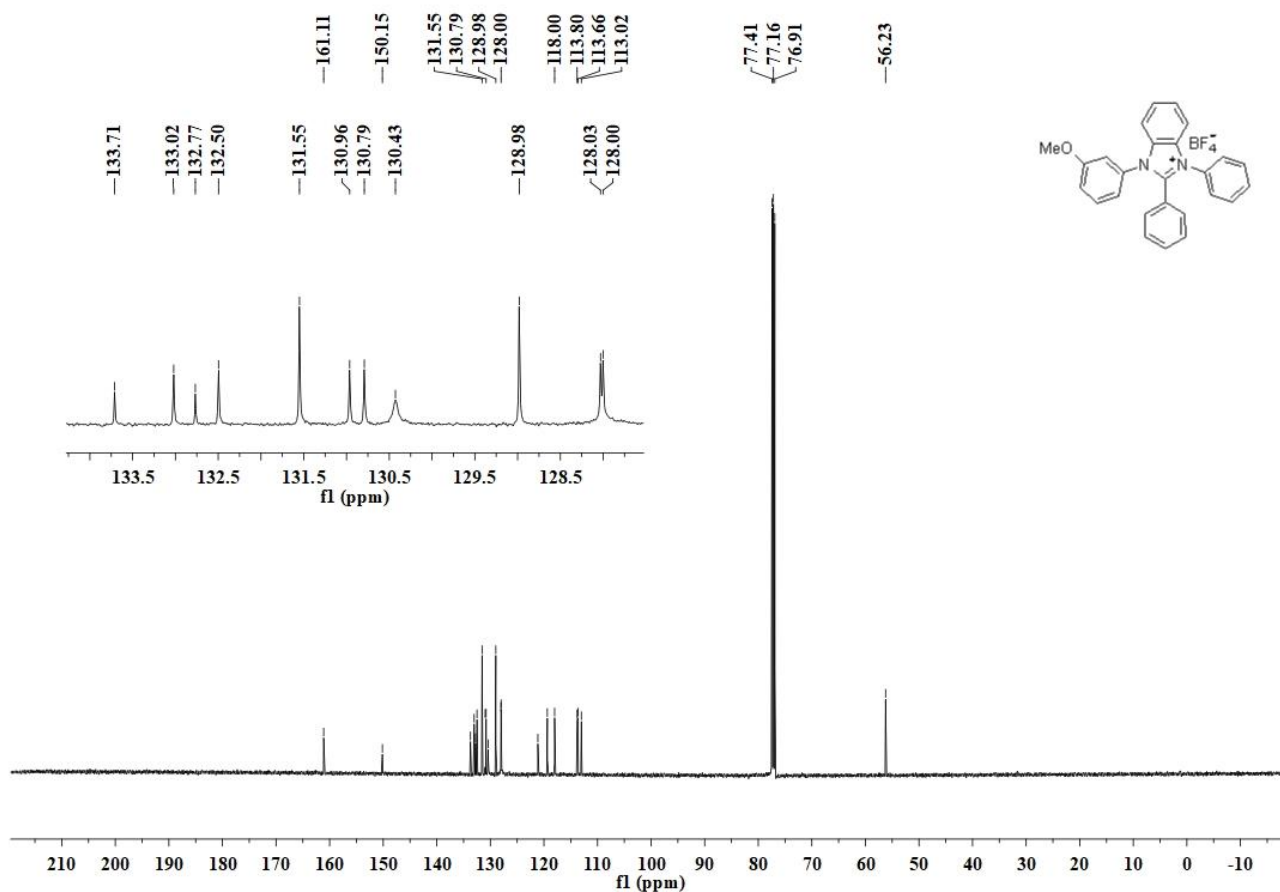

$^1\text{H}$  NMR (500 MHz,  $\text{DMSO-}d_6$ ) of **4i/7c**

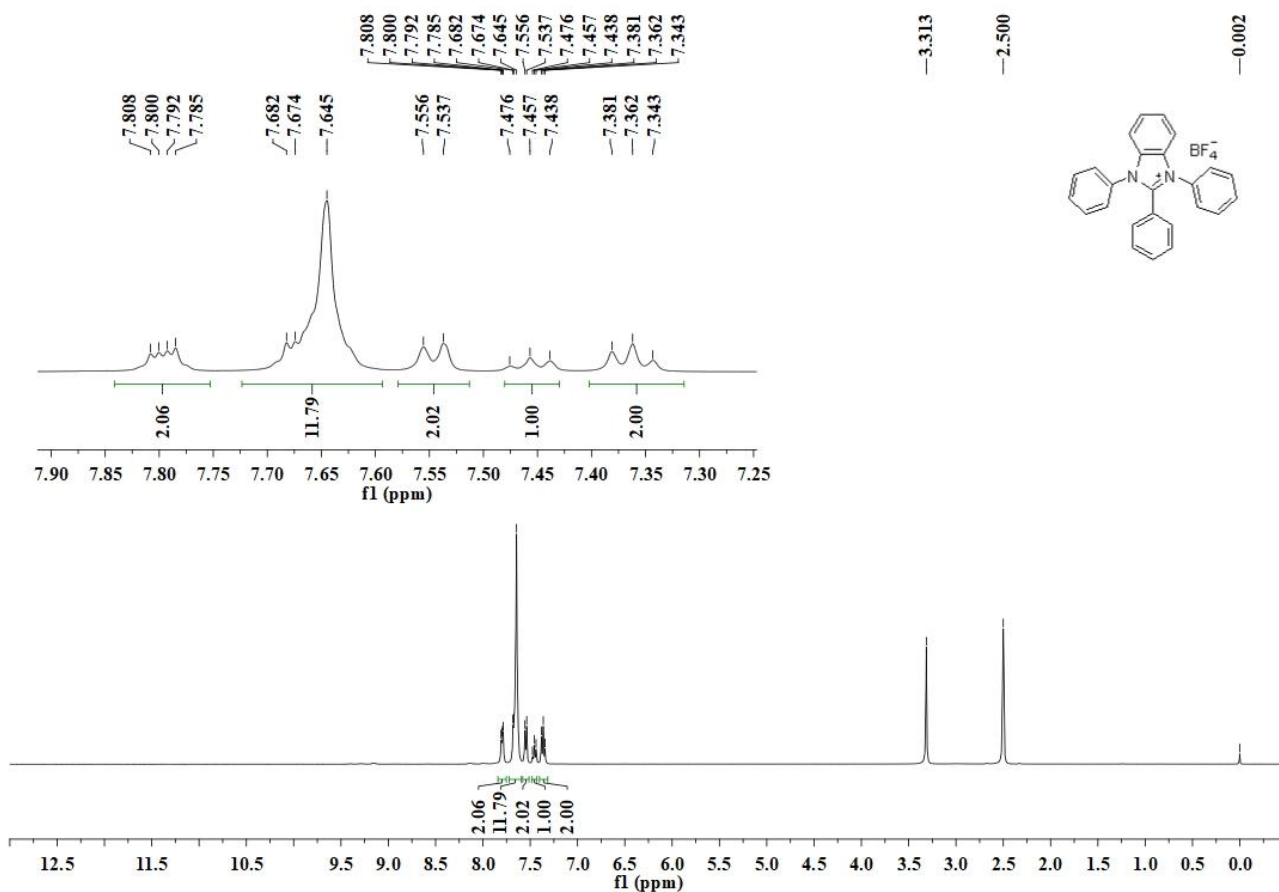

$^{13}\text{C}$  NMR (126 MHz,  $\text{DMSO-}d_6$ ) of **4i/7c**

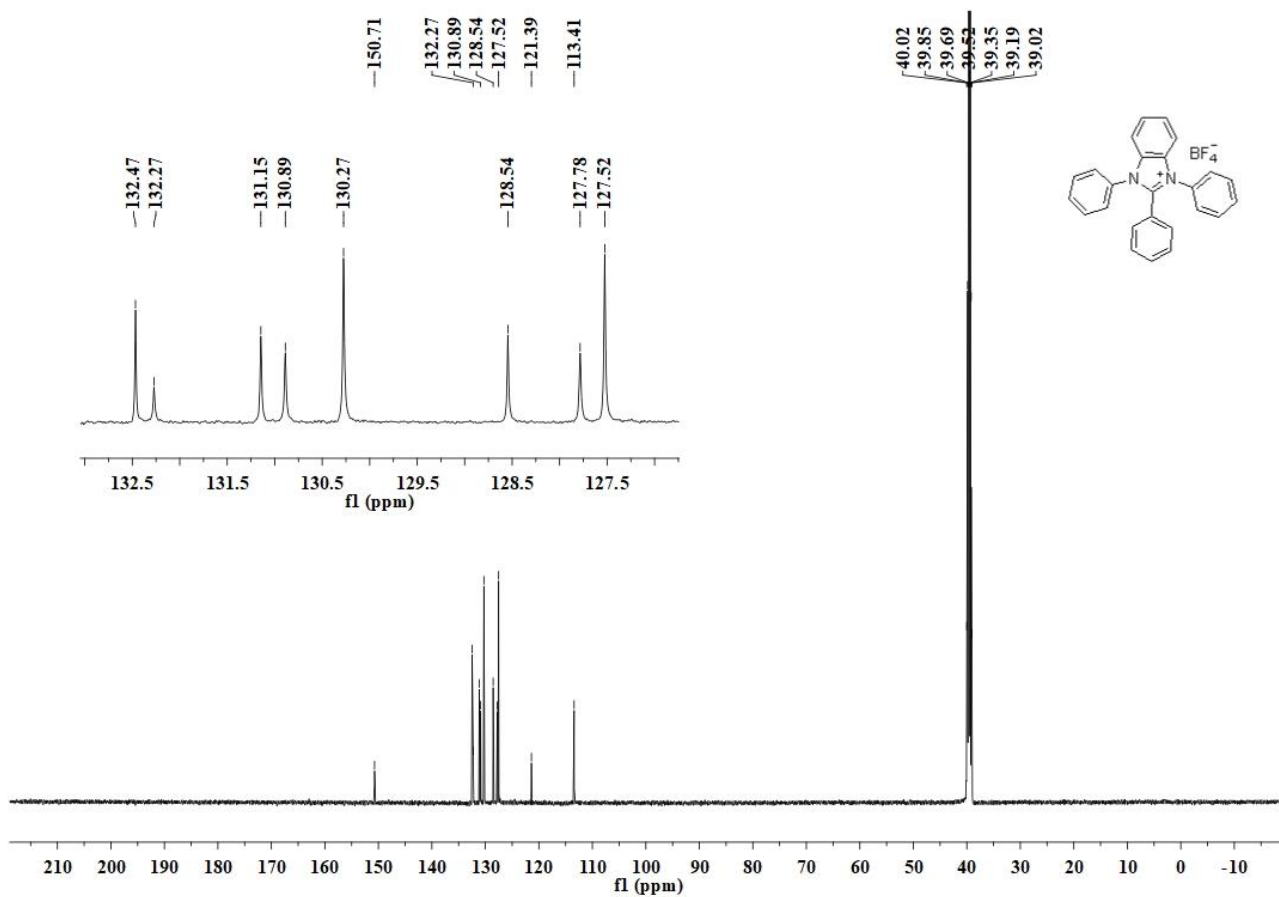

<sup>1</sup>H NMR (500 MHz, CDCl<sub>3</sub>) of **4j**

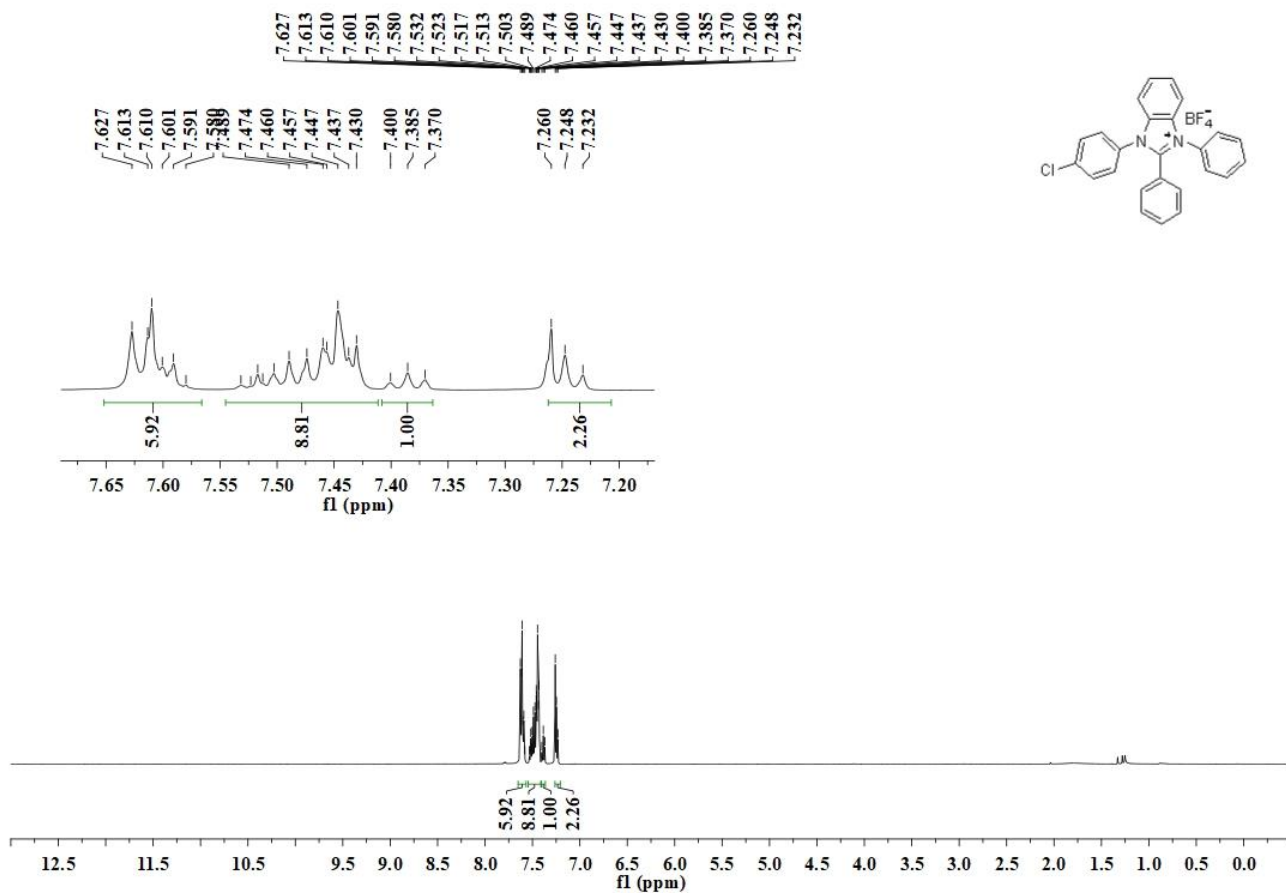

<sup>13</sup>C NMR (126 MHz, CDCl<sub>3</sub>) of **4j**

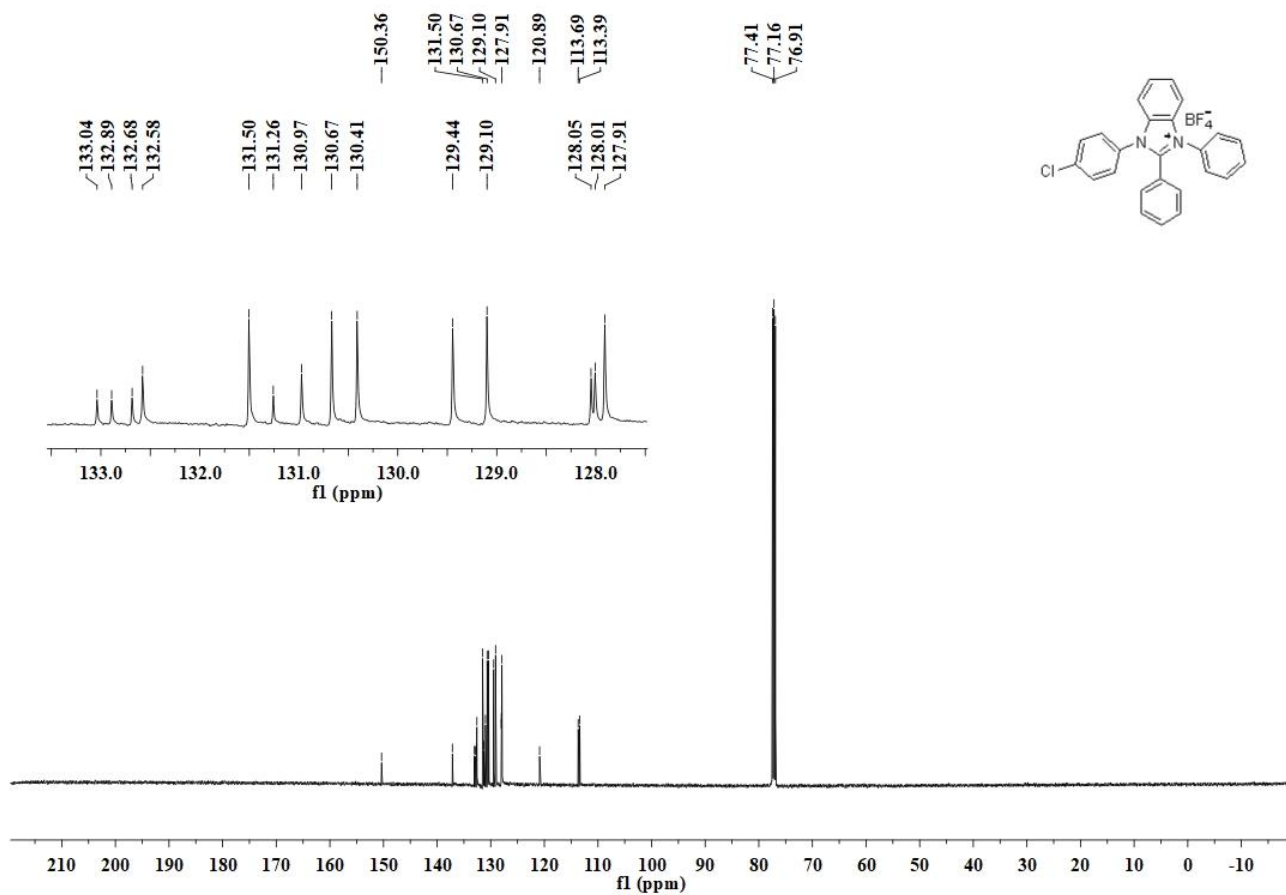

<sup>1</sup>H NMR (400 MHz, CDCl<sub>3</sub>) of **4k**

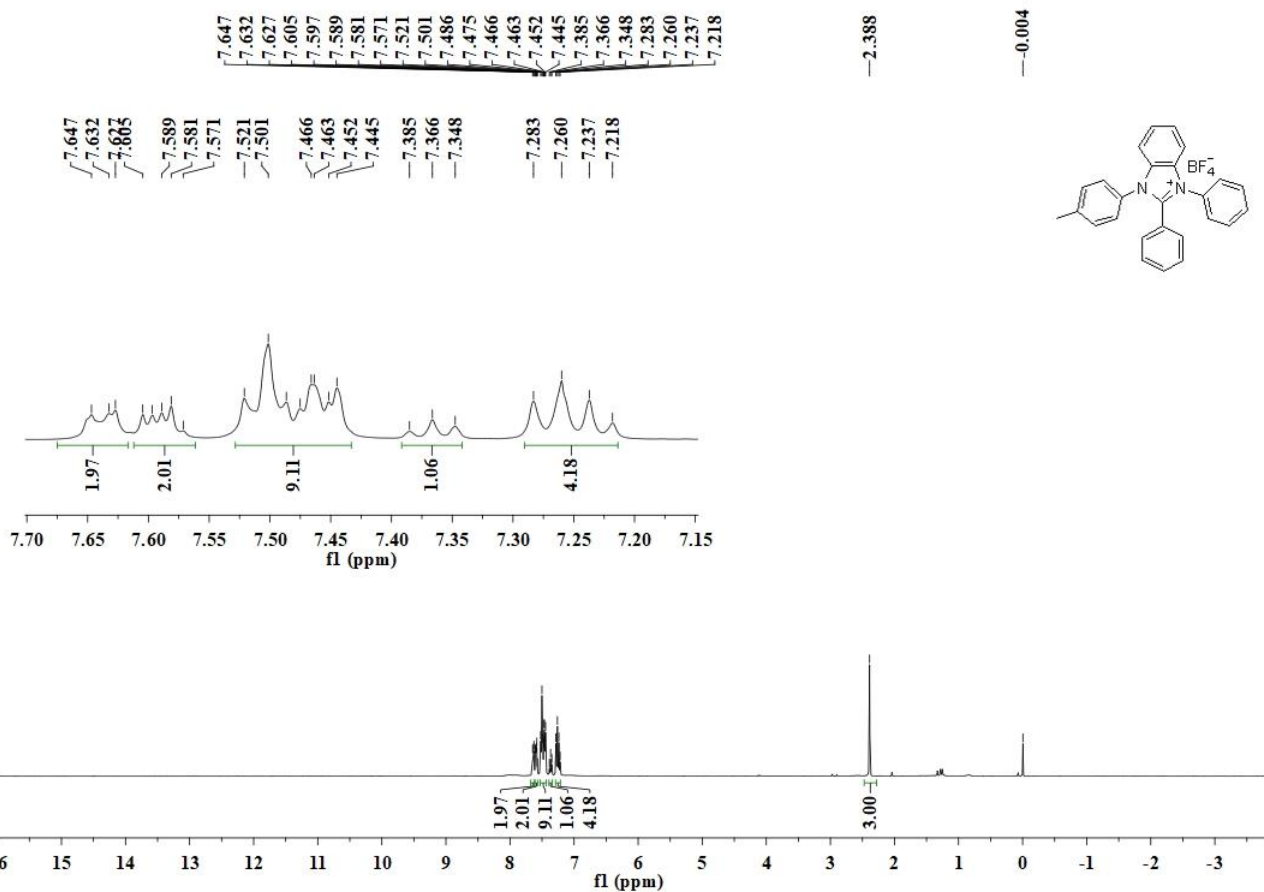

<sup>13</sup>C NMR (101 MHz, CDCl<sub>3</sub>) of **4k**

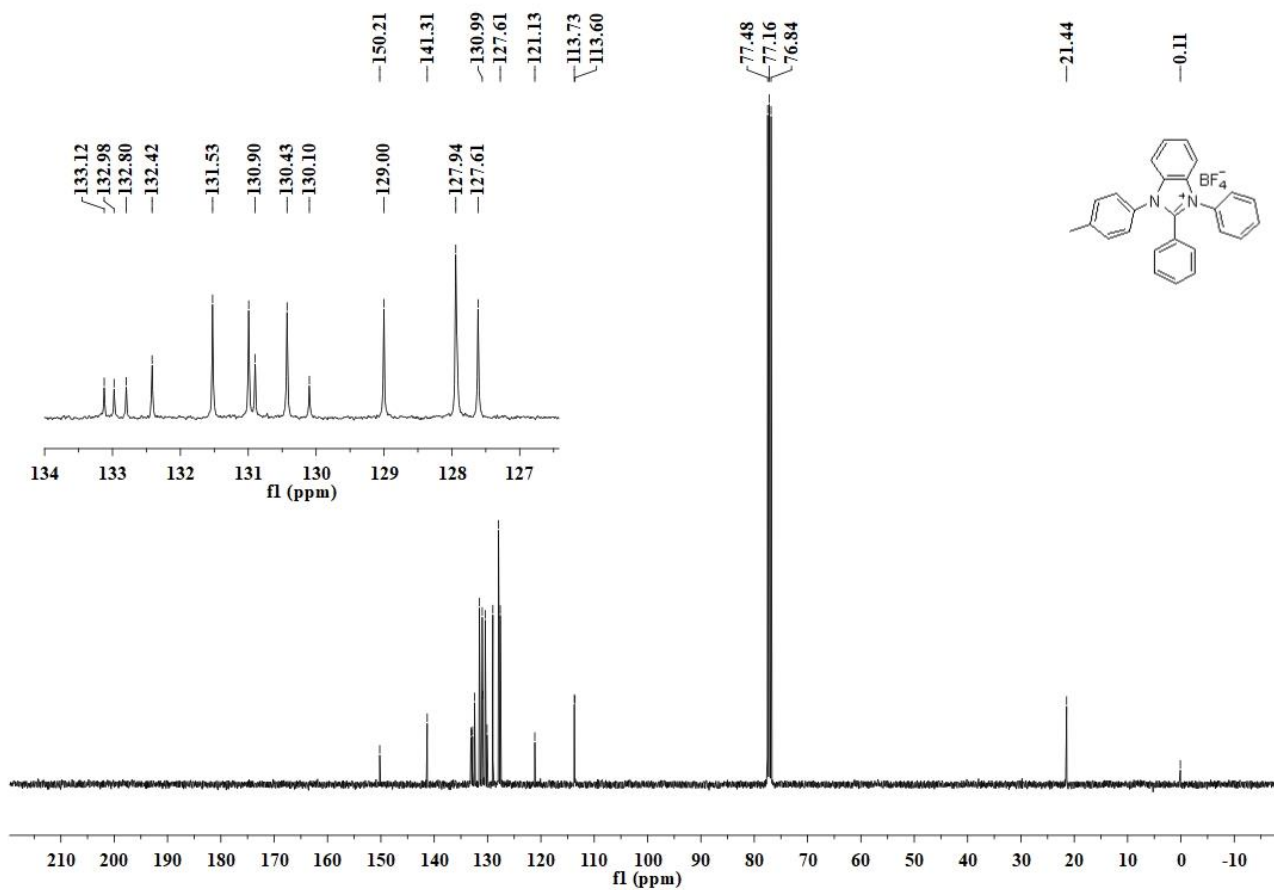

<sup>1</sup>H NMR (500 MHz, DMSO-*d*<sub>6</sub>) of **4l**

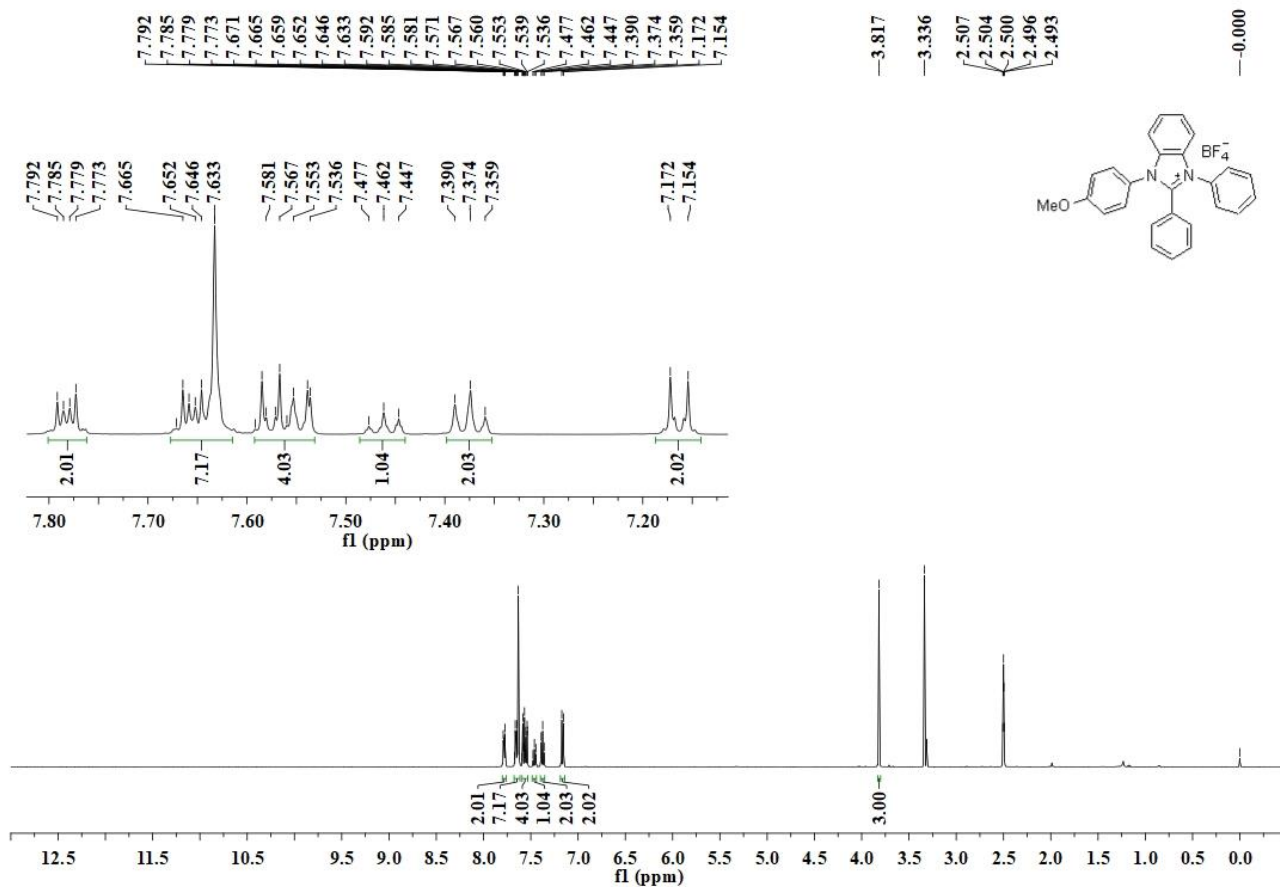

<sup>13</sup>C NMR (126 MHz, DMSO-*d*<sub>6</sub>) of **4l**

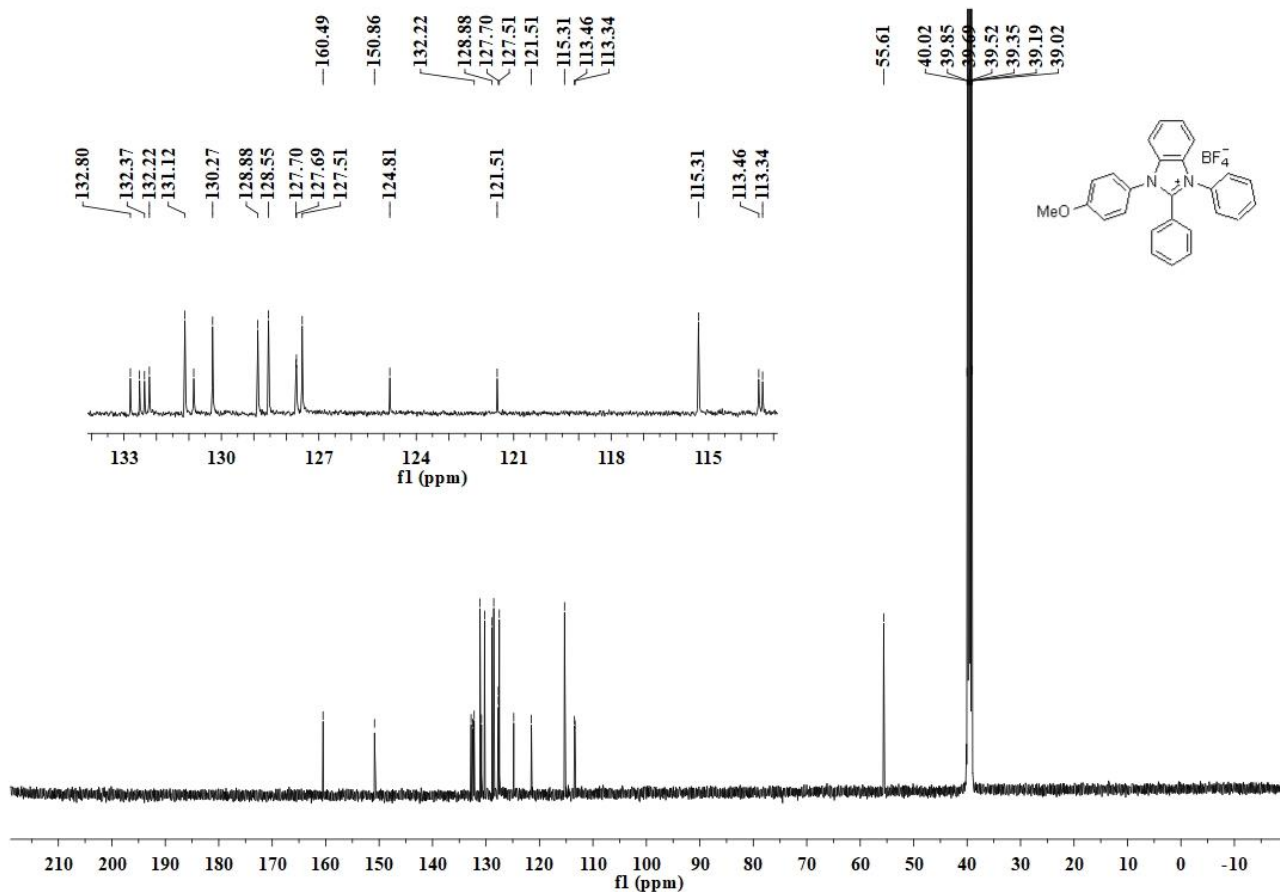

$^1\text{H}$  NMR (400 MHz,  $\text{CDCl}_3$ ) of **4m**

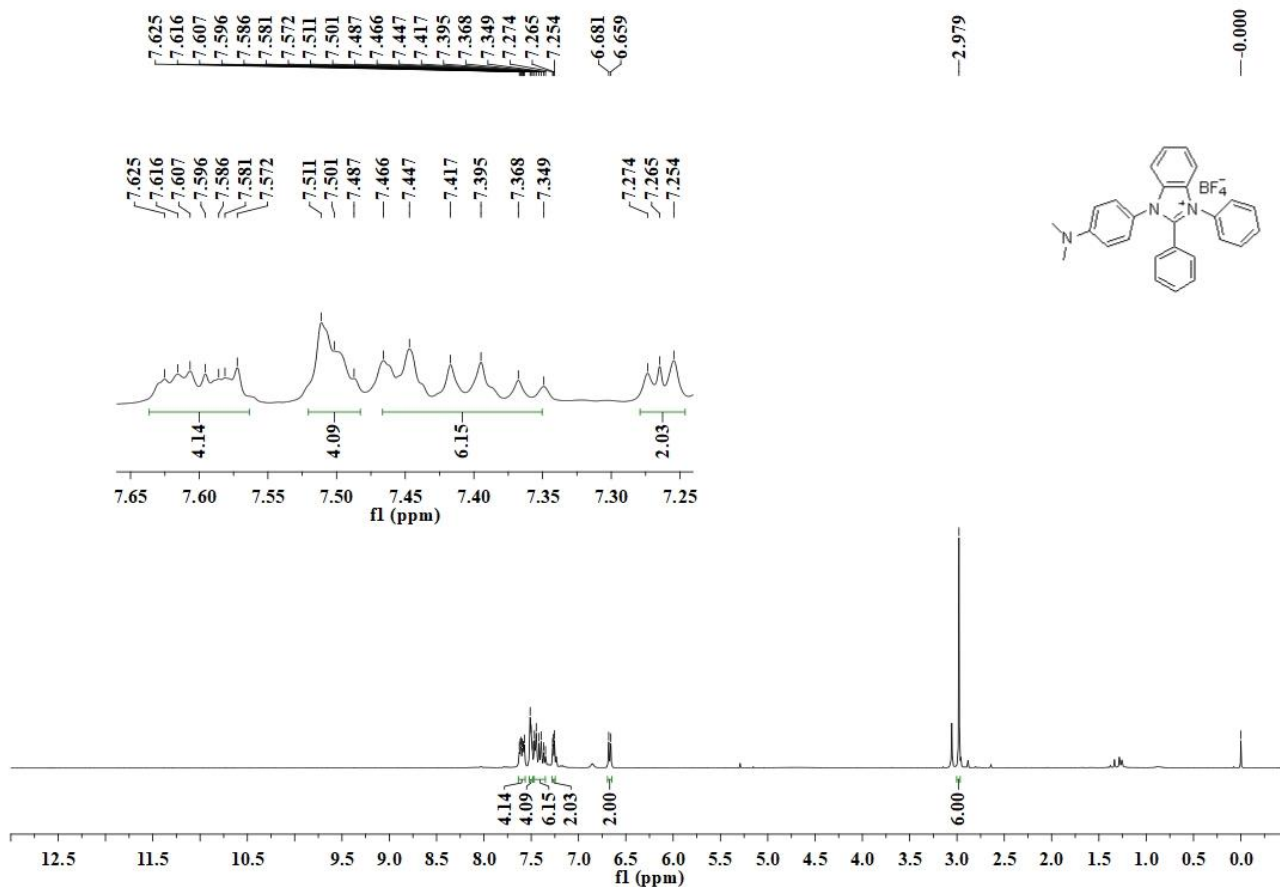

$^{13}\text{C}$  NMR (101 MHz,  $\text{CDCl}_3$ ) of **4m**

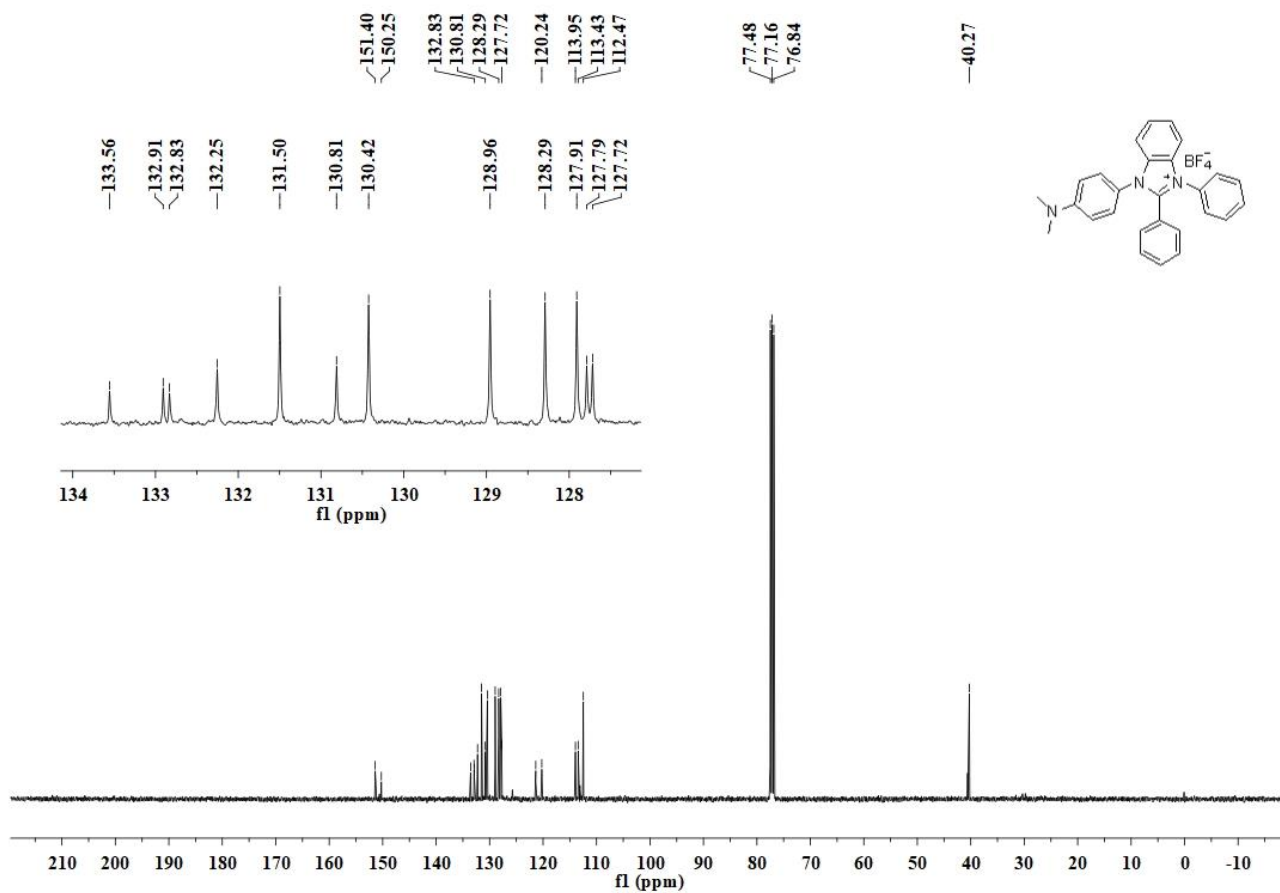

$^1\text{H}$  NMR (500 MHz,  $\text{DMSO-}d_6$ ) of **4n**

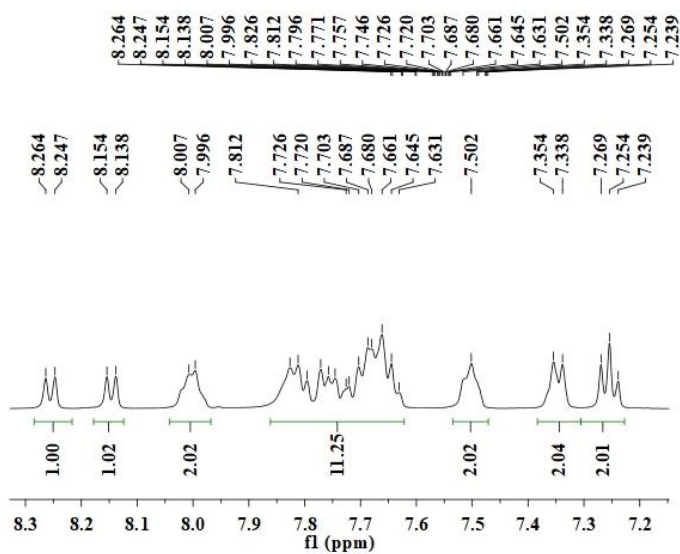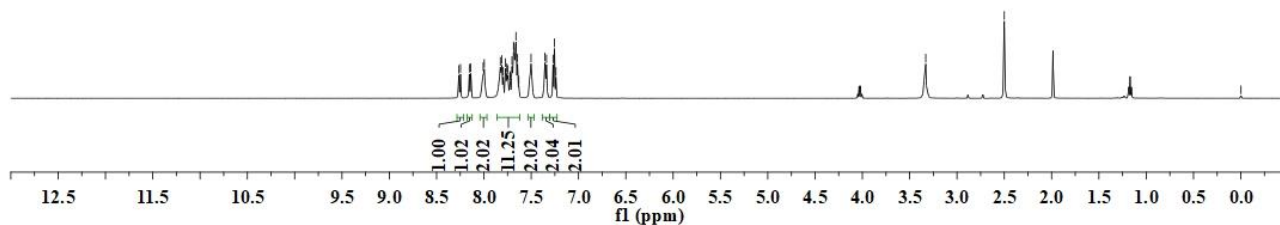

$^{13}\text{C}$  NMR (126 MHz,  $\text{DMSO-}d_6$ ) of **4n**

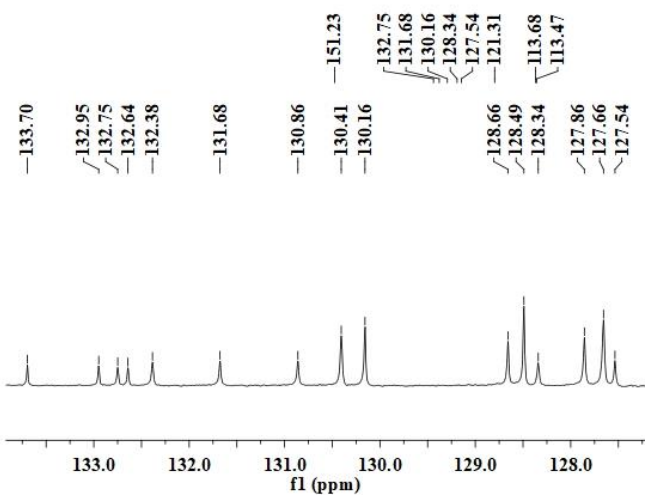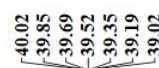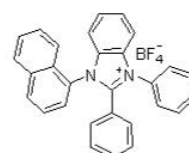



$^1\text{H}$  NMR (500 MHz,  $\text{DMSO-}d_6$ ) of **4o**

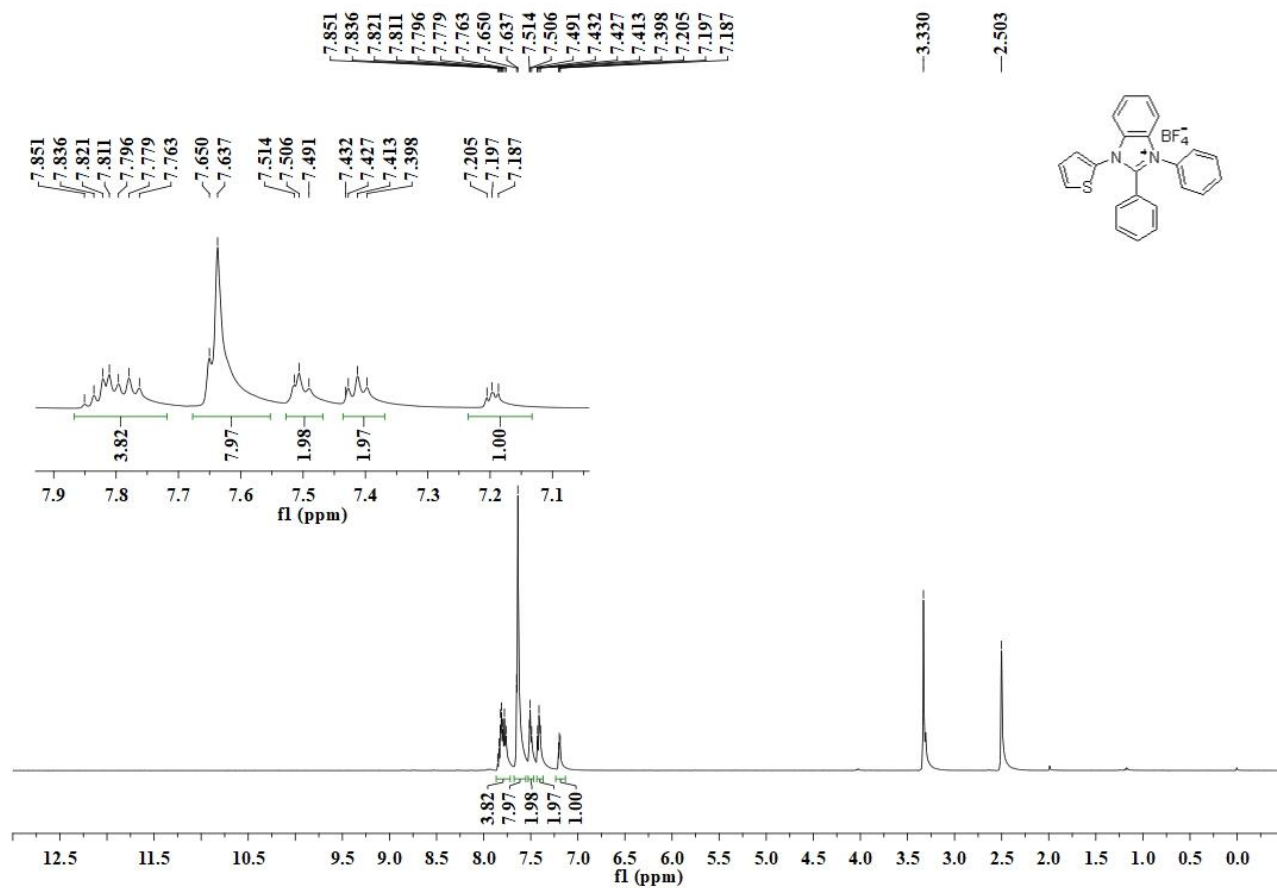

$^{13}\text{C}$  NMR (126 MHz,  $\text{DMSO-}d_6$ ) of **4o**

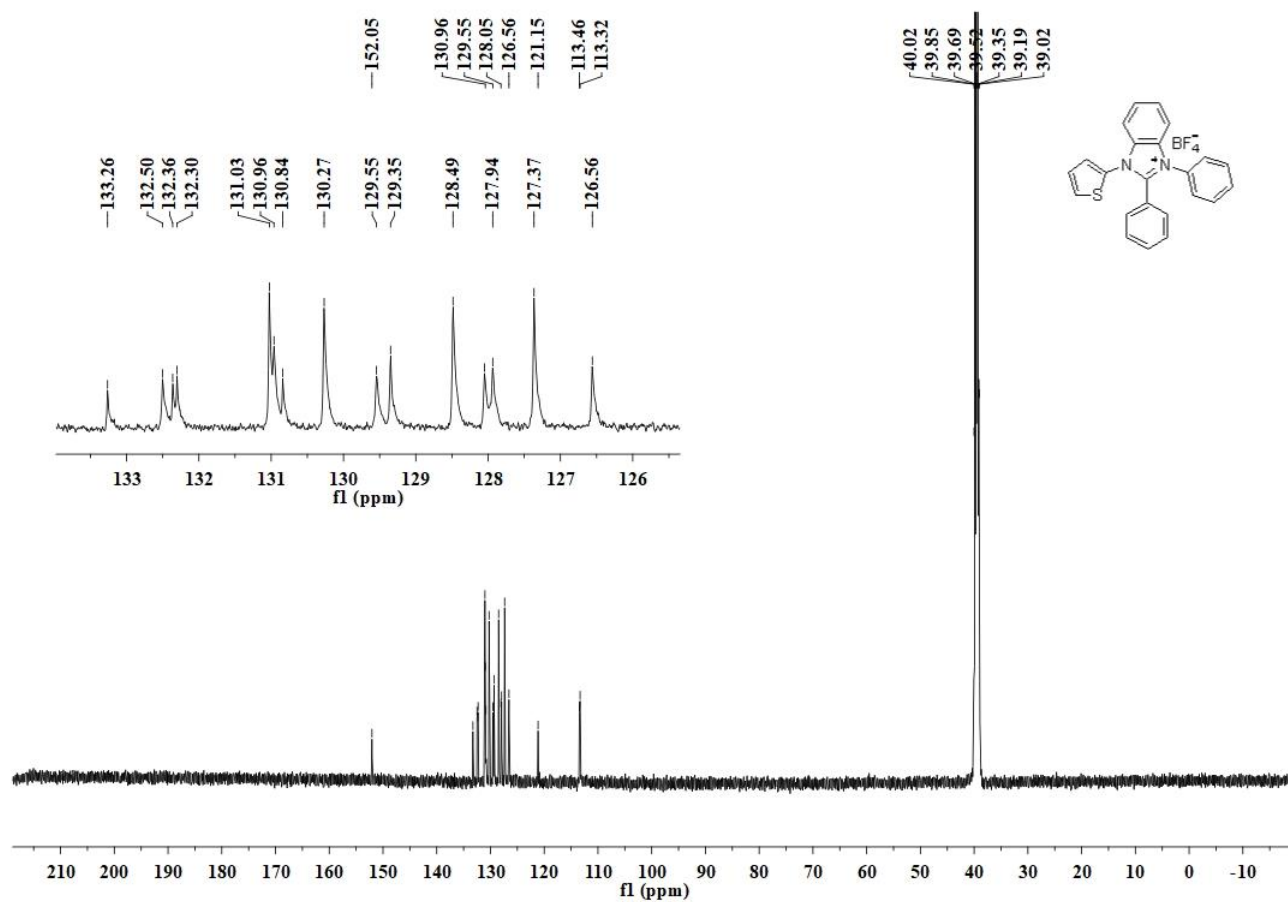

$^1\text{H}$  NMR (400 MHz, DMSO-*d*<sub>6</sub>) of **4p**

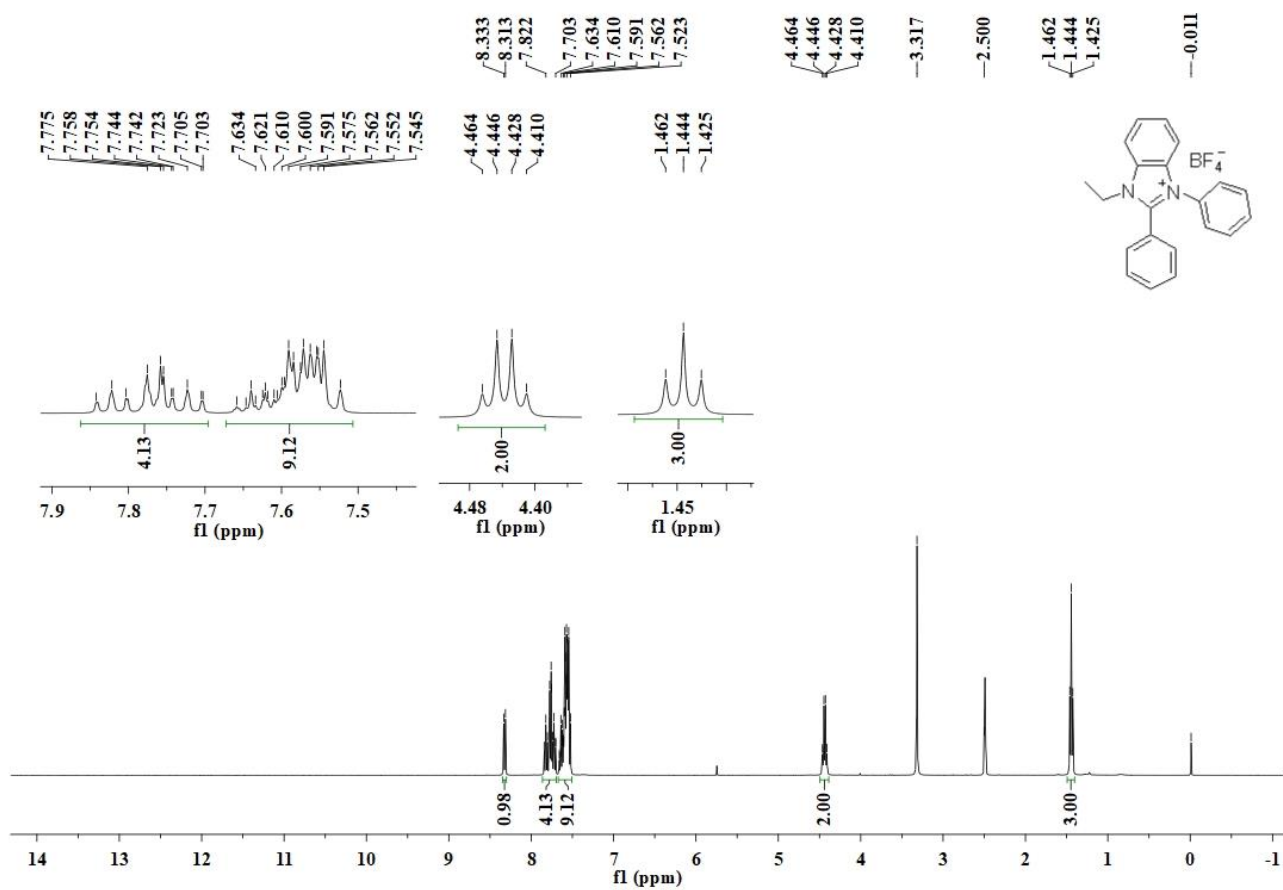

$^{13}\text{C}$  NMR (101 MHz, DMSO-*d*<sub>6</sub>) of **4p**

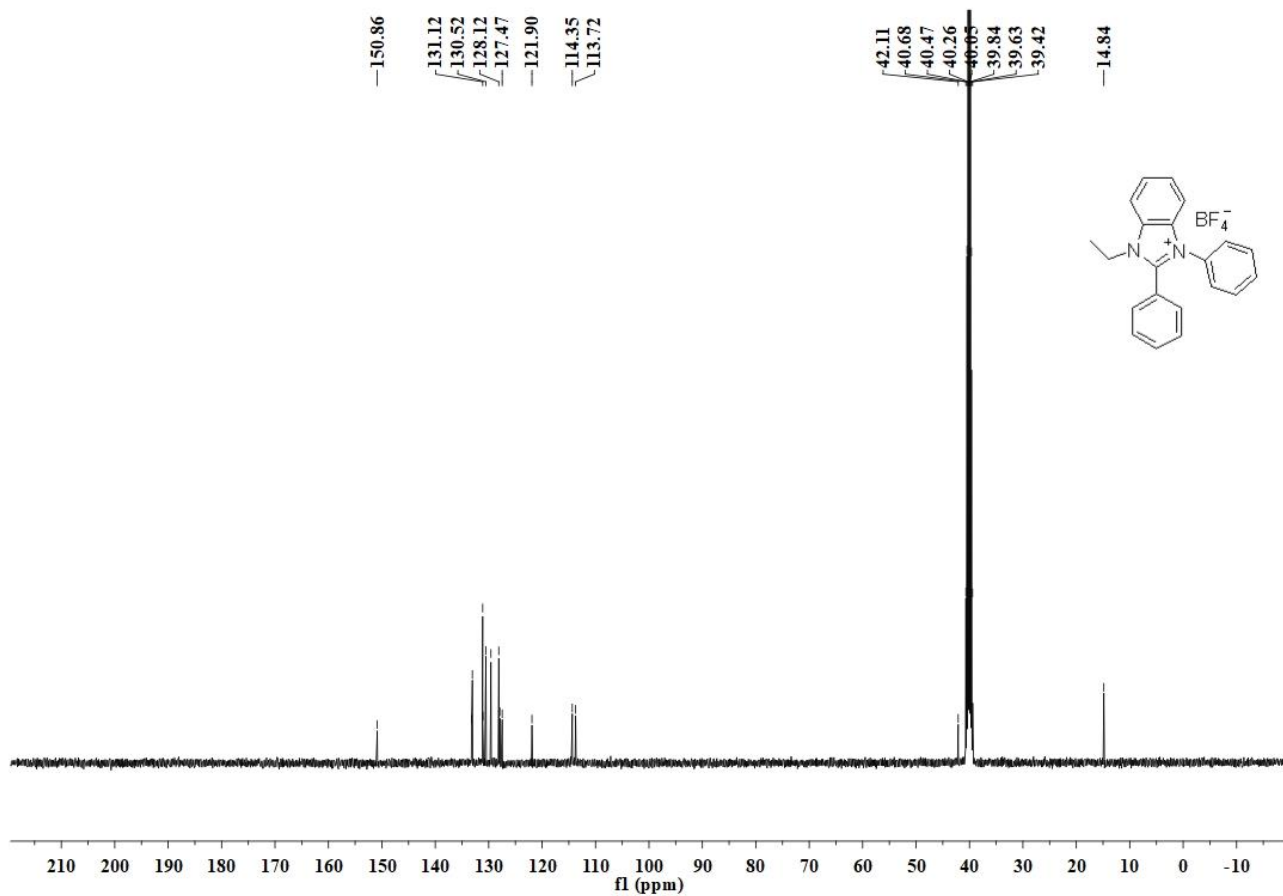

$^1\text{H}$  NMR (400 MHz,  $\text{CDCl}_3$ ) of **4q**

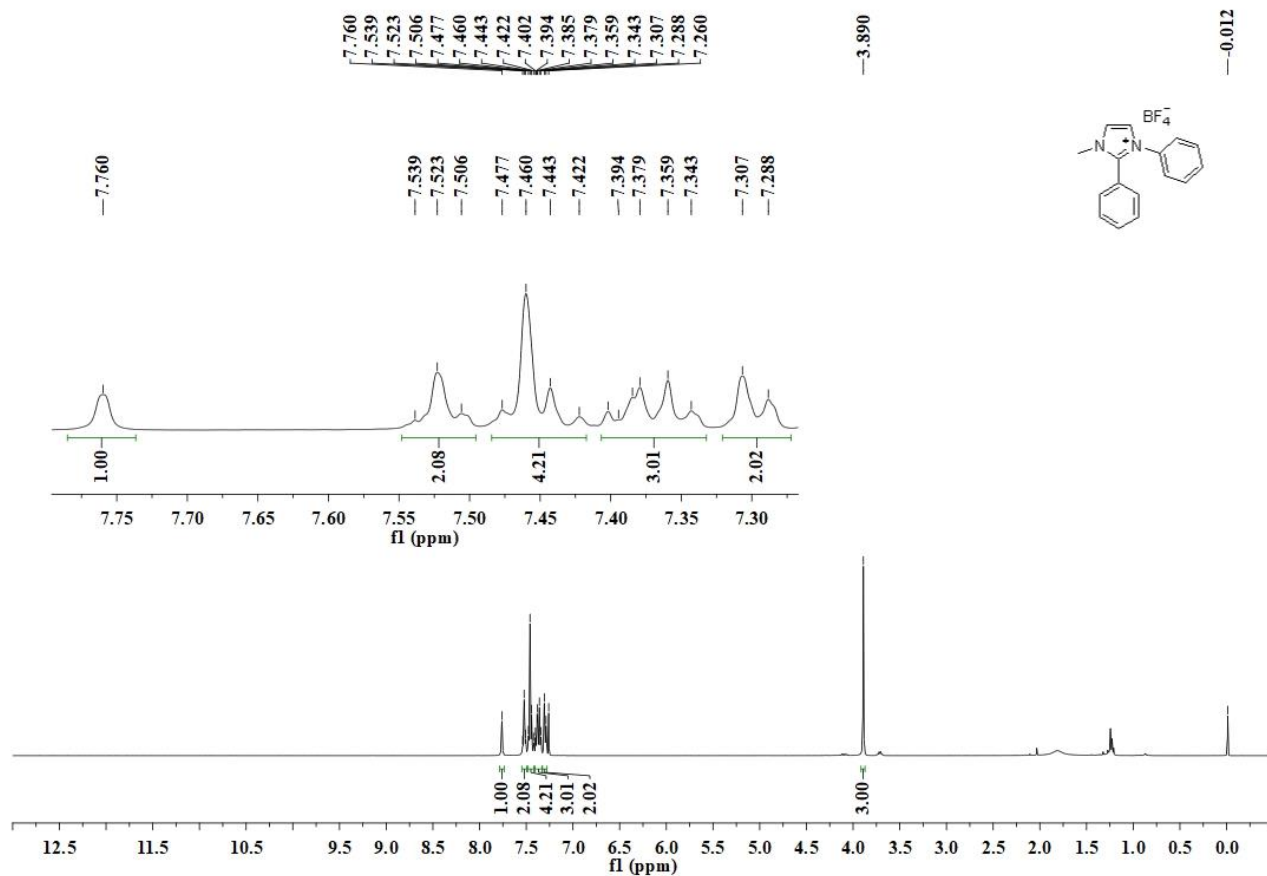

$^{13}\text{C}$  NMR (101 MHz,  $\text{CDCl}_3$ ) of **4q**

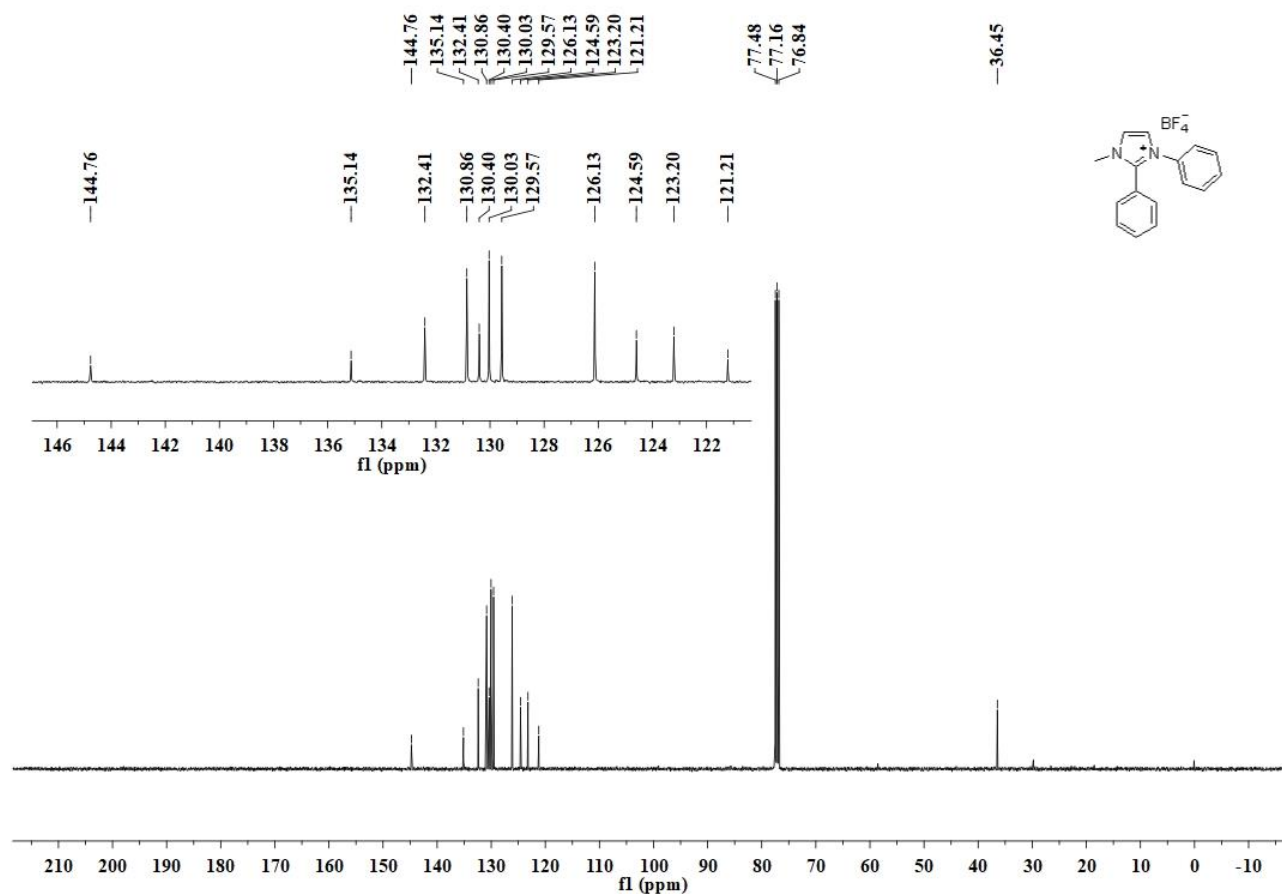

<sup>1</sup>H NMR (500 MHz, CDCl<sub>3</sub>) of **5a**

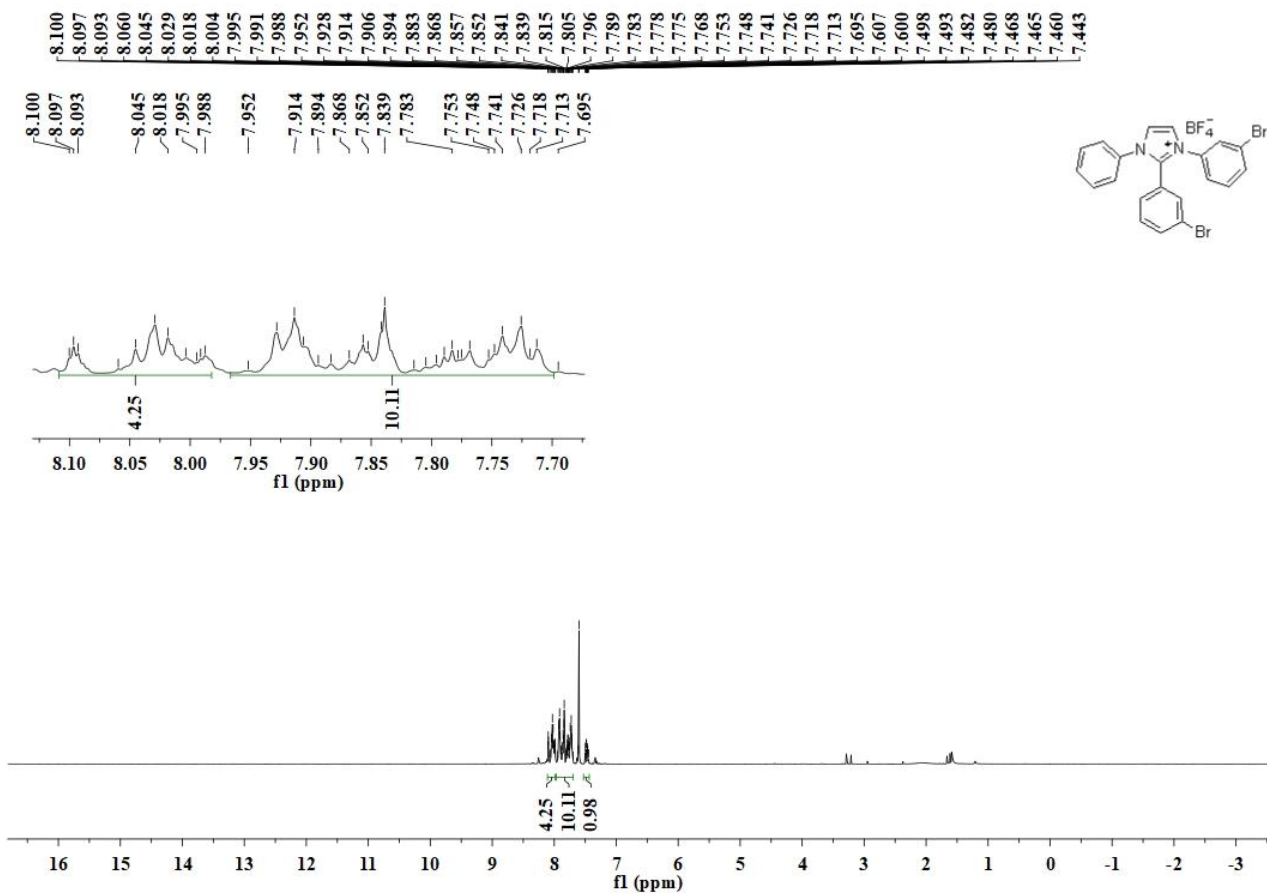

<sup>13</sup>C NMR (126 MHz, CDCl<sub>3</sub>) of **5a**

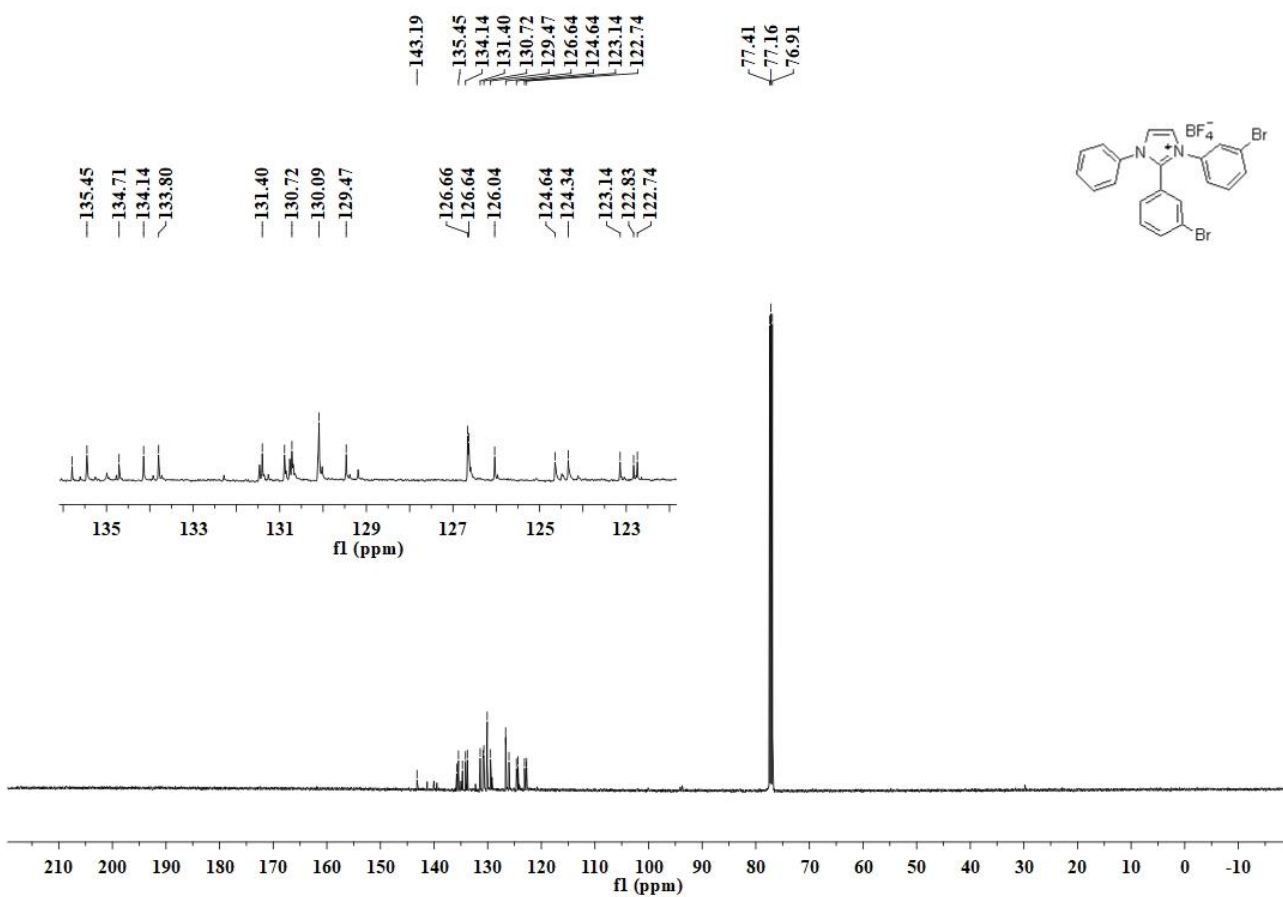

$^1\text{H}$  NMR (500 MHz,  $\text{CDCl}_3$ ) of **5b**

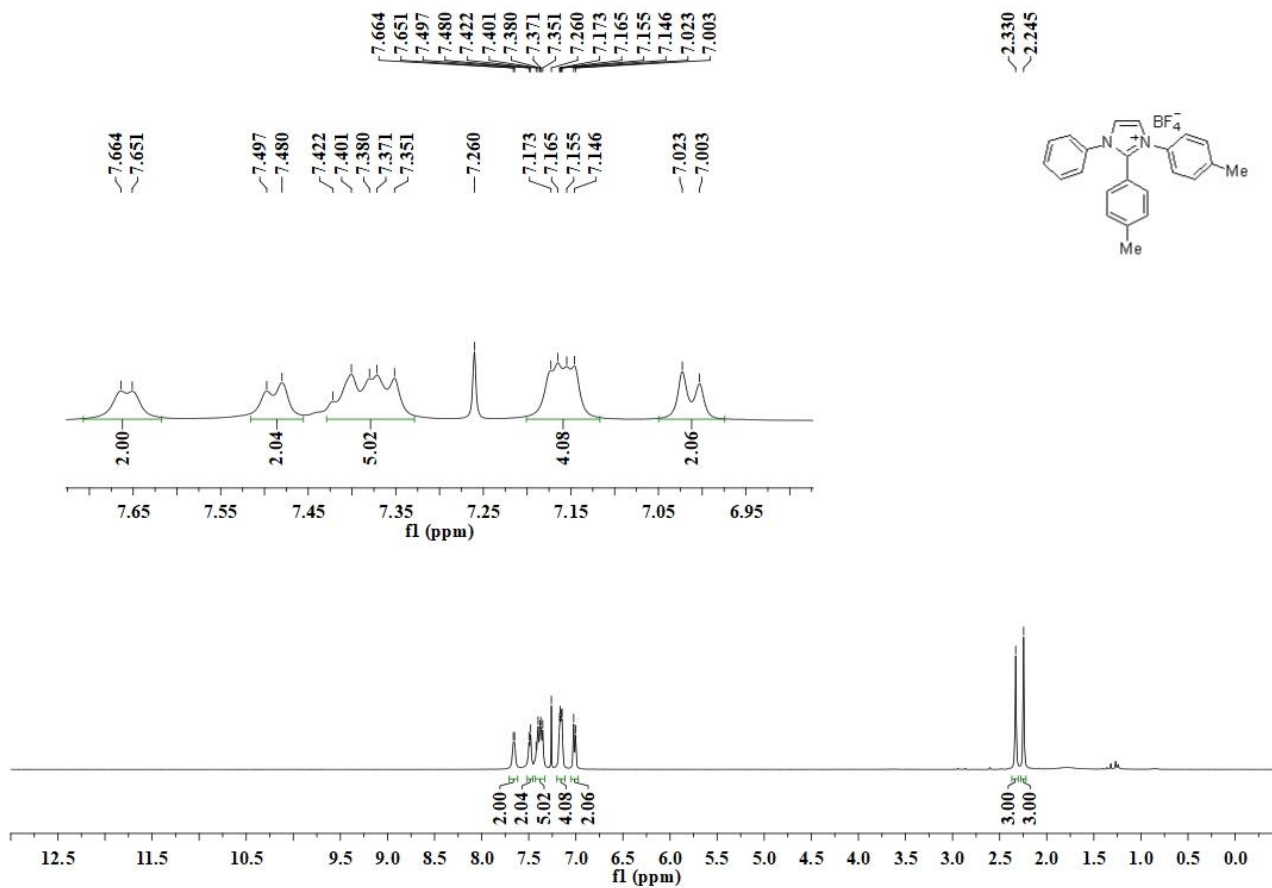

$^{13}\text{C}$  NMR (126 MHz,  $\text{CDCl}_3$ ) of **5b**

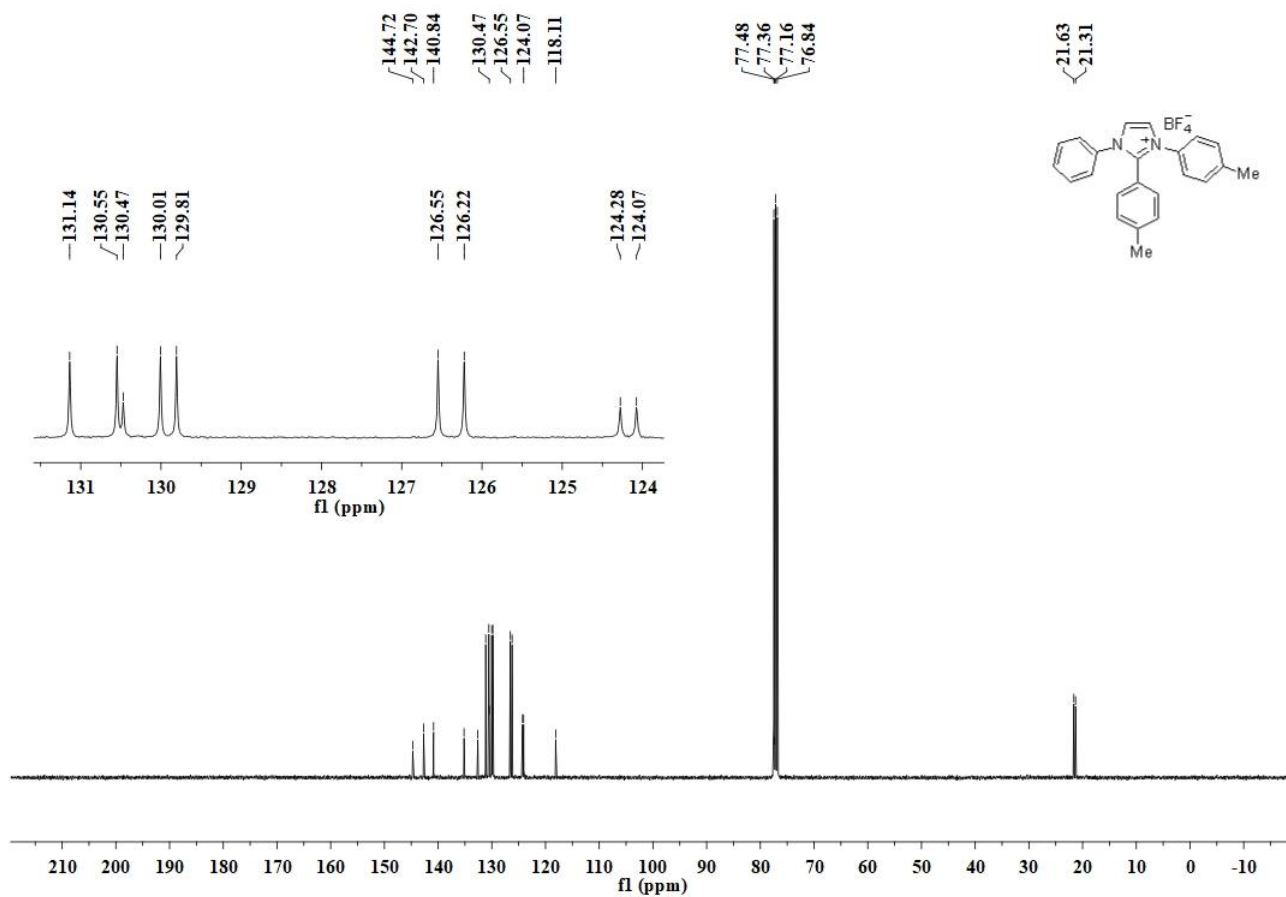

$^1\text{H}$  NMR (400 MHz,  $\text{CDCl}_3$ ) of **5c**

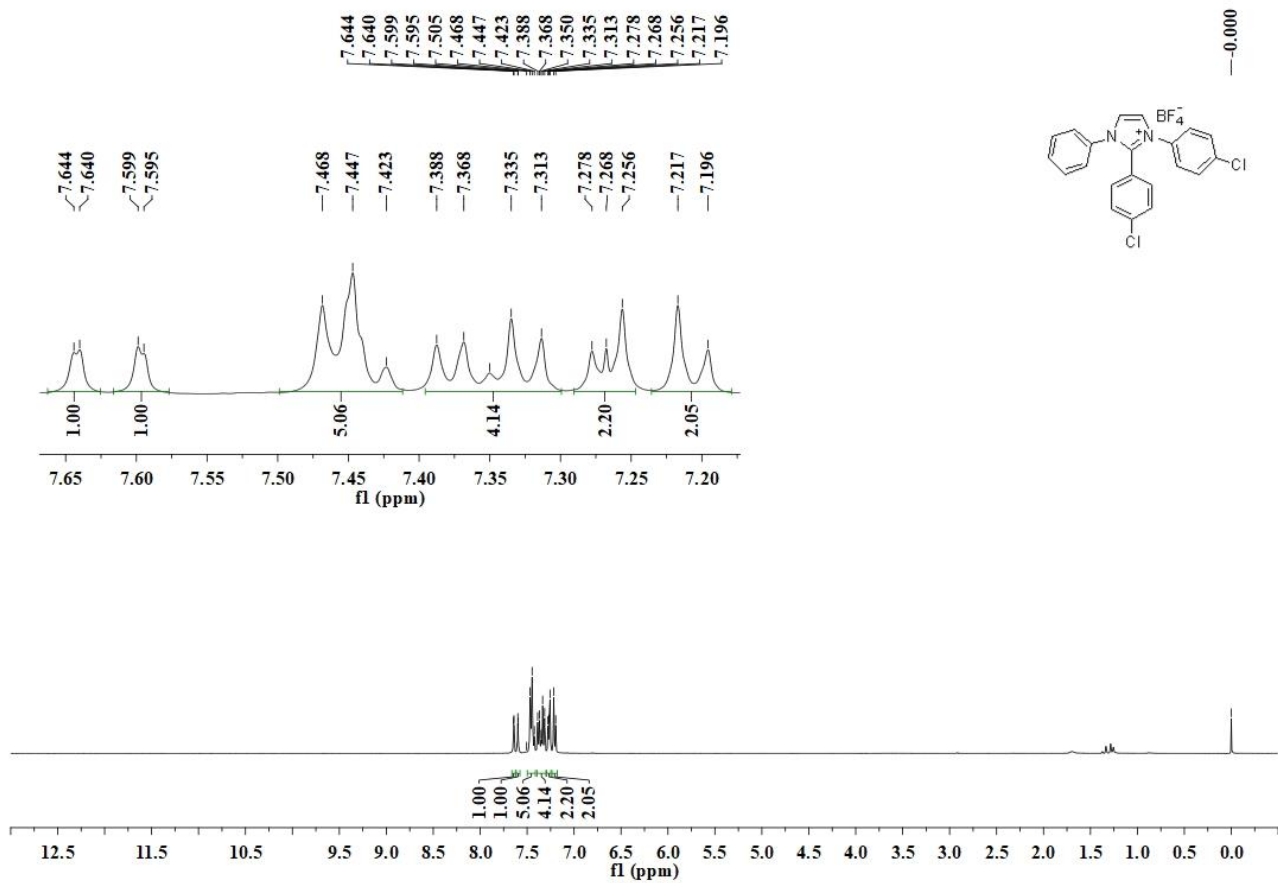

$^{13}\text{C}$  NMR (101 MHz,  $\text{CDCl}_3$ ) of **5c**

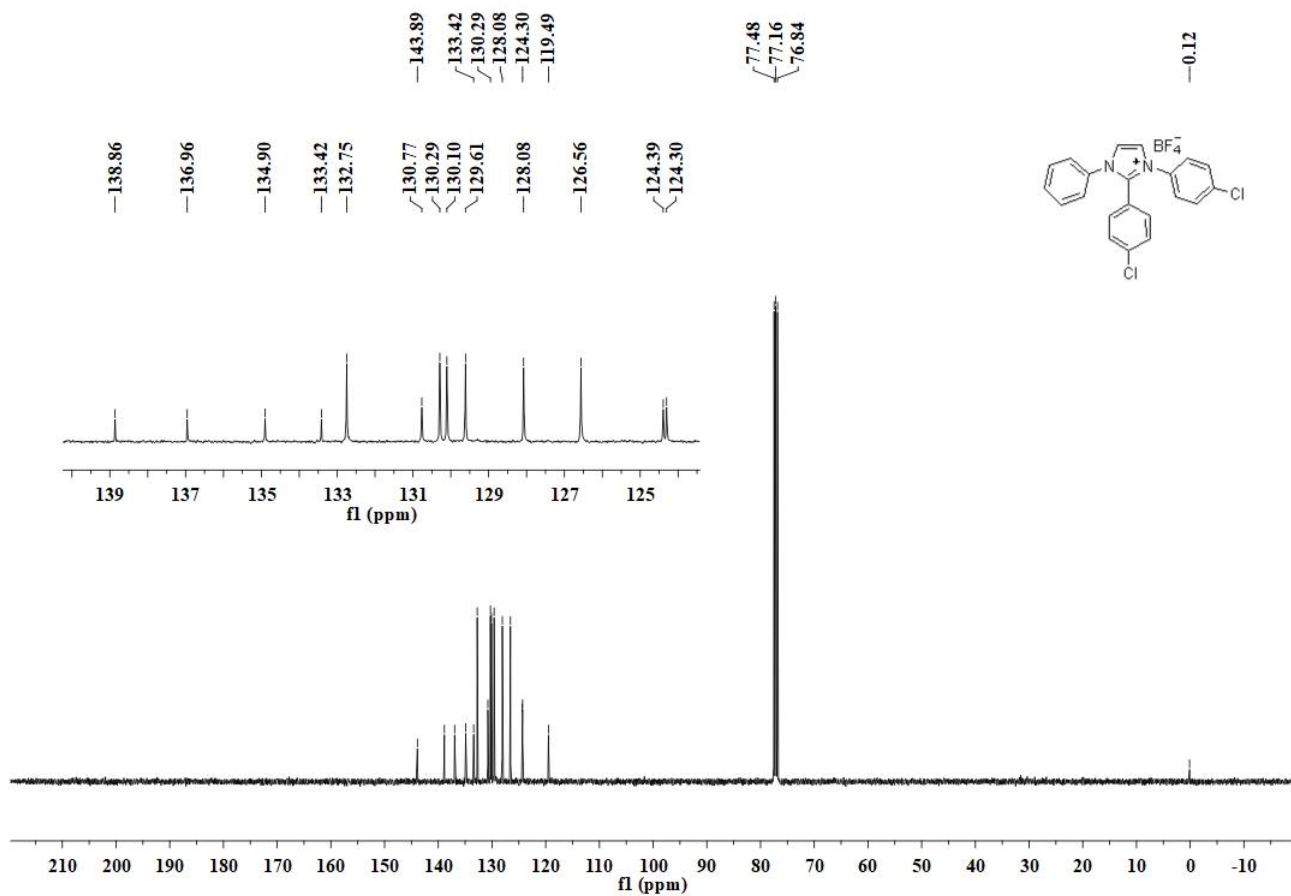

$^1\text{H}$  NMR (400 MHz,  $\text{DMSO-}d_6$ ) of **5d**

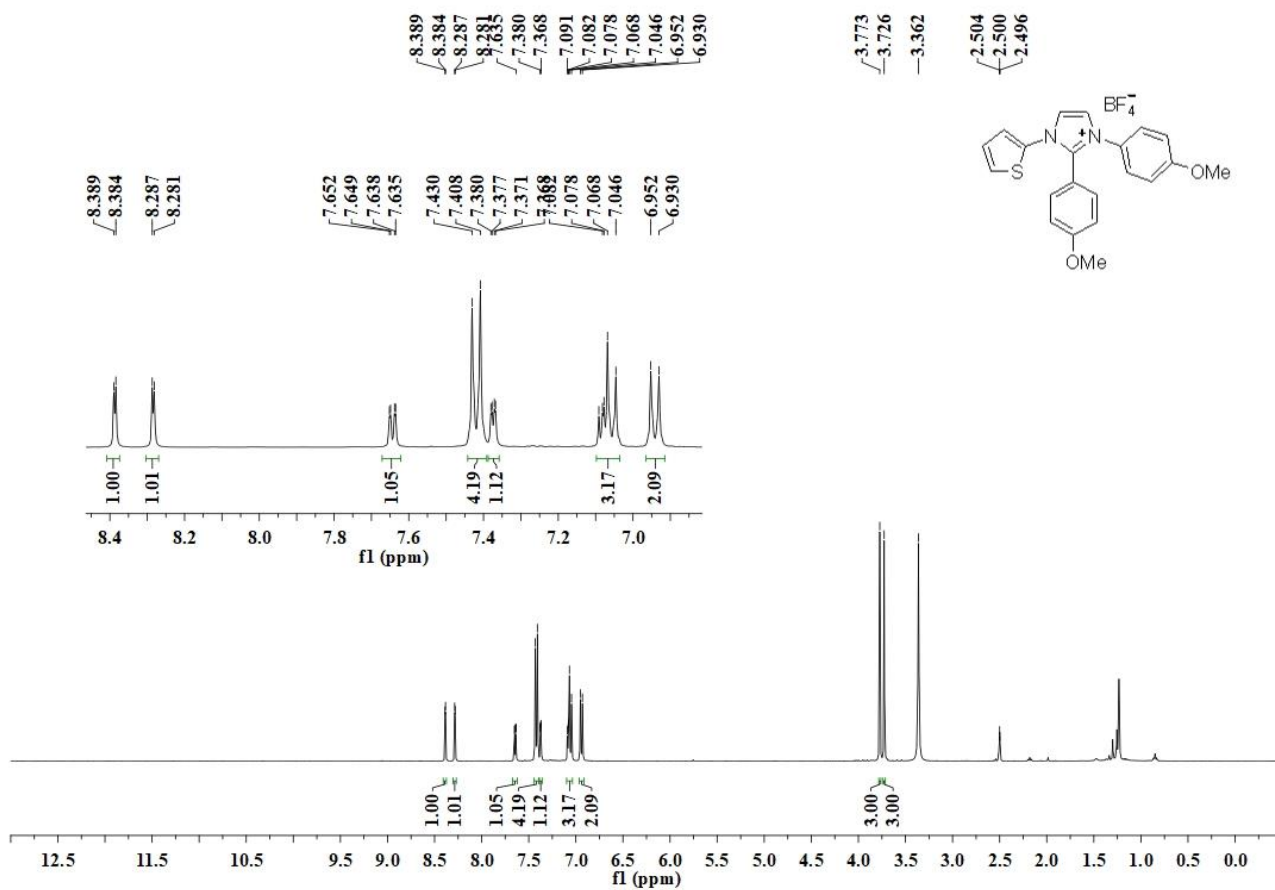

$^{13}\text{C}$  NMR (400 MHz,  $\text{DMSO-}d_6$ ) of **5d**

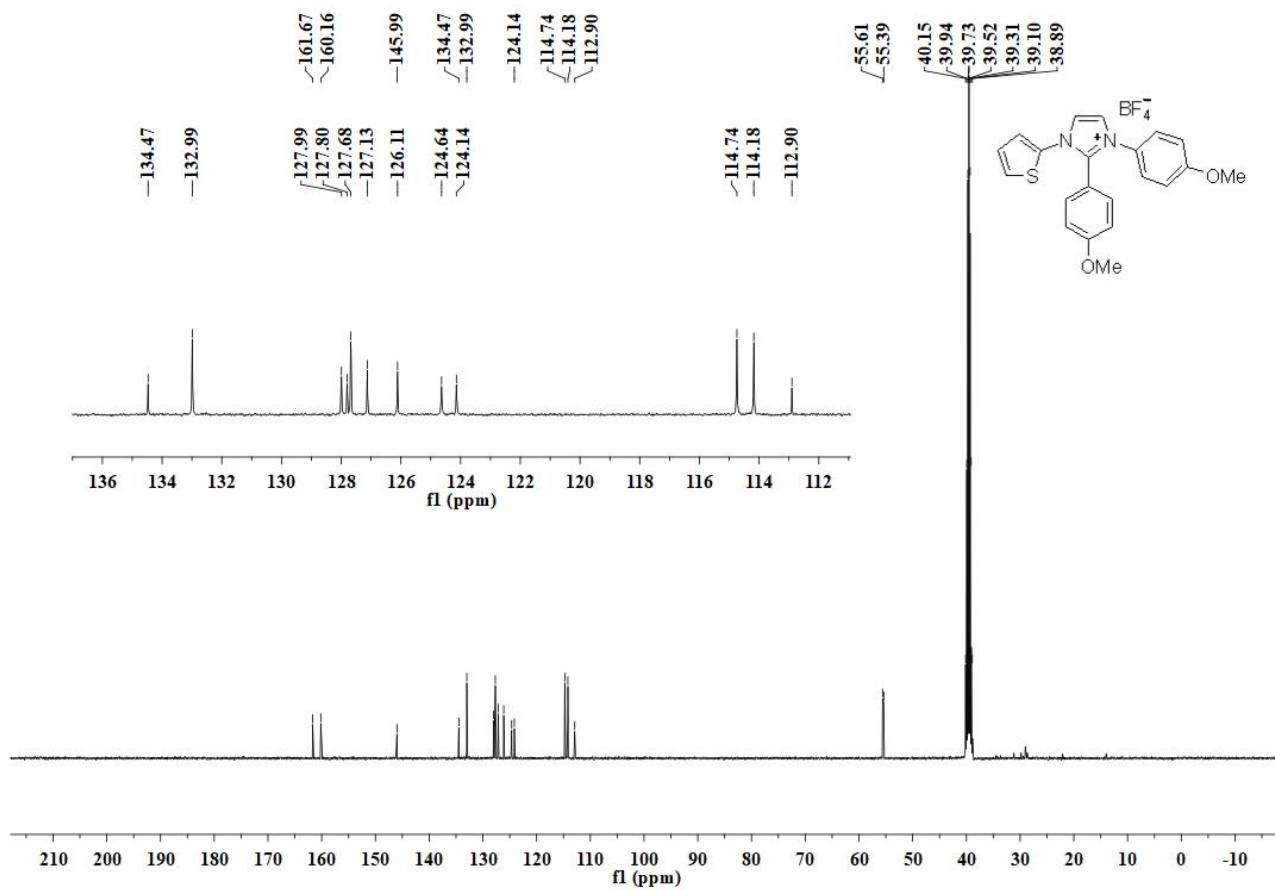

$^1\text{H}$  NMR (400 MHz,  $\text{DMSO-}d_6$ ) of **5e**

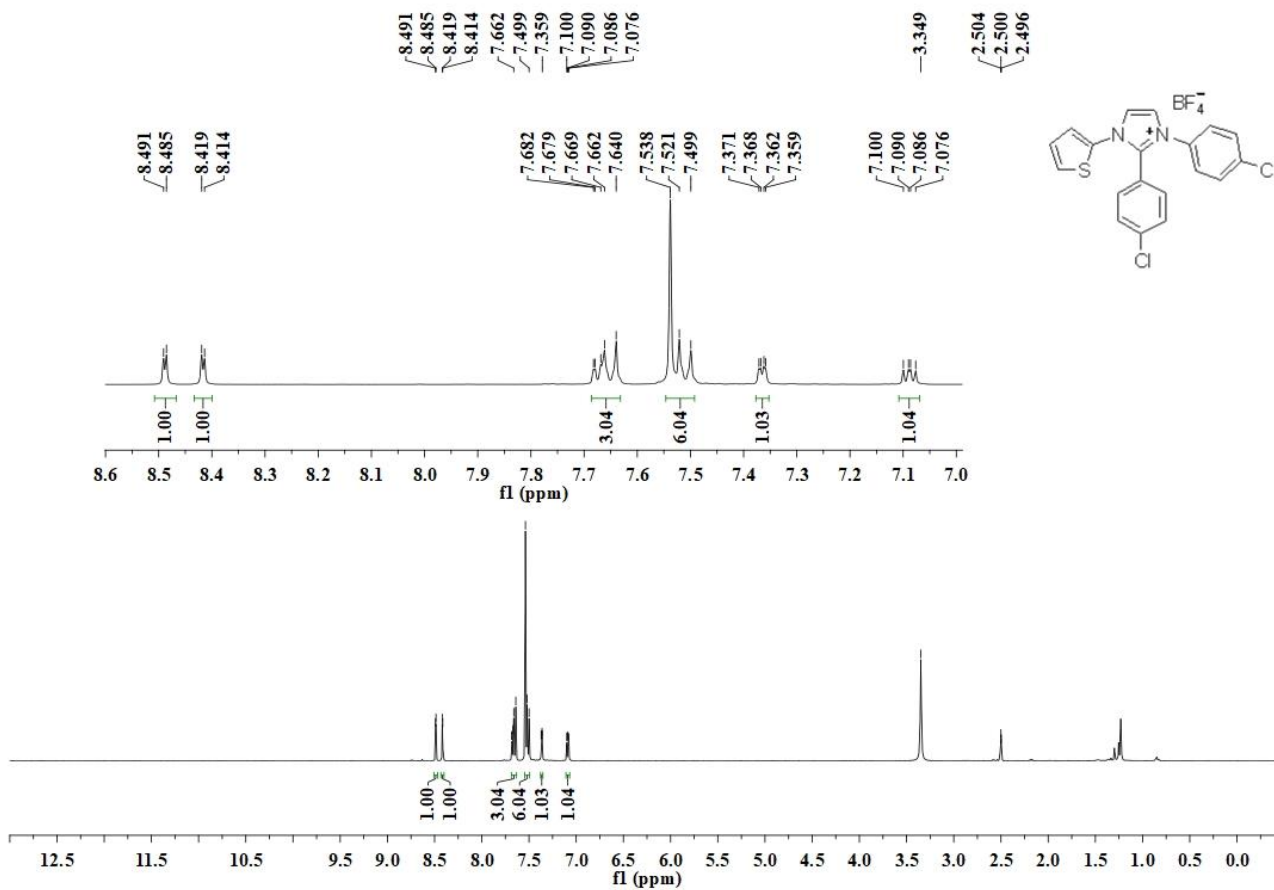

$^1\text{H}$  NMR (400 MHz,  $\text{DMSO-}d_6$ ) of **5e**

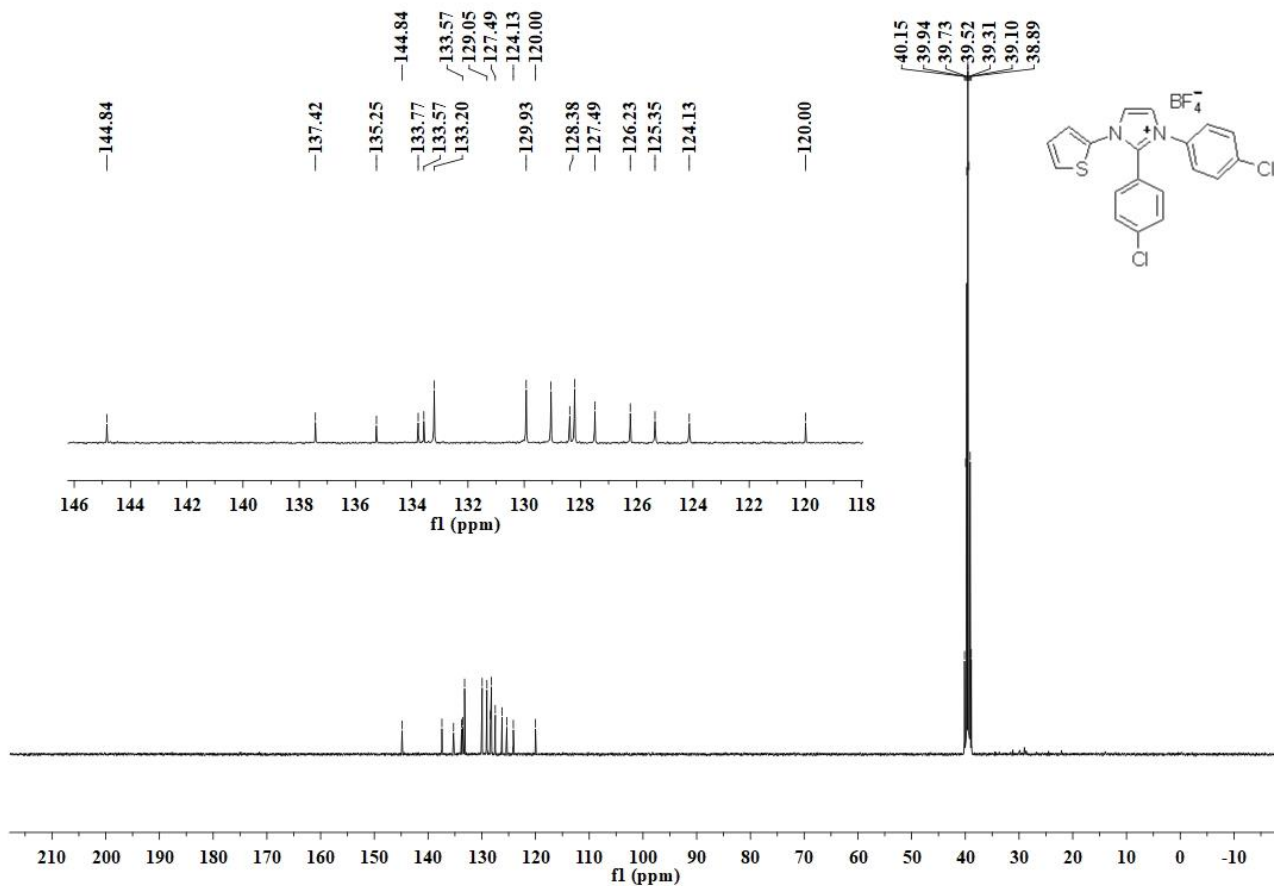



$^1\text{H}$  NMR (500 MHz,  $\text{DMSO-}d_6$ ) of **5f**

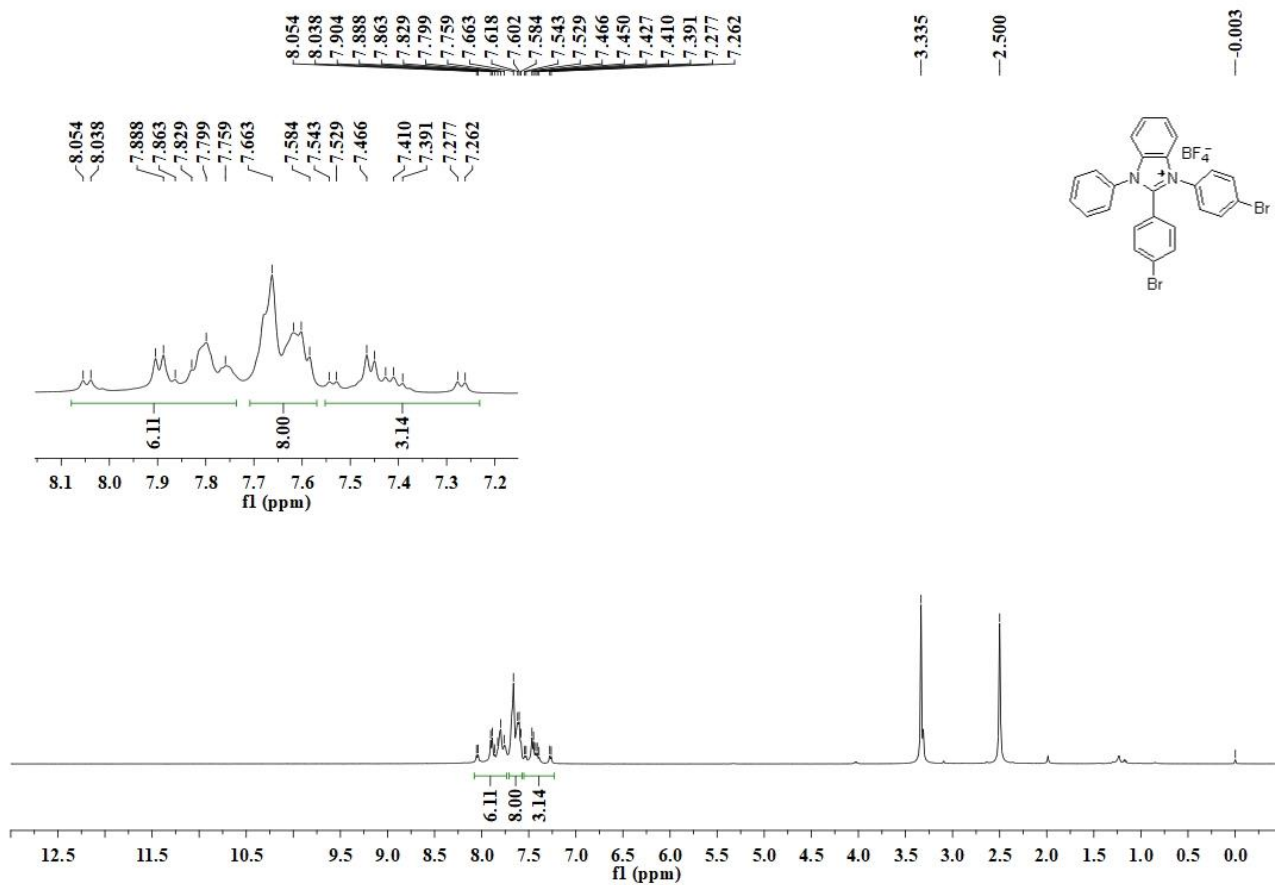

$^{13}\text{C}$  NMR (126 MHz,  $\text{DMSO-}d_6$ ) of **5f**

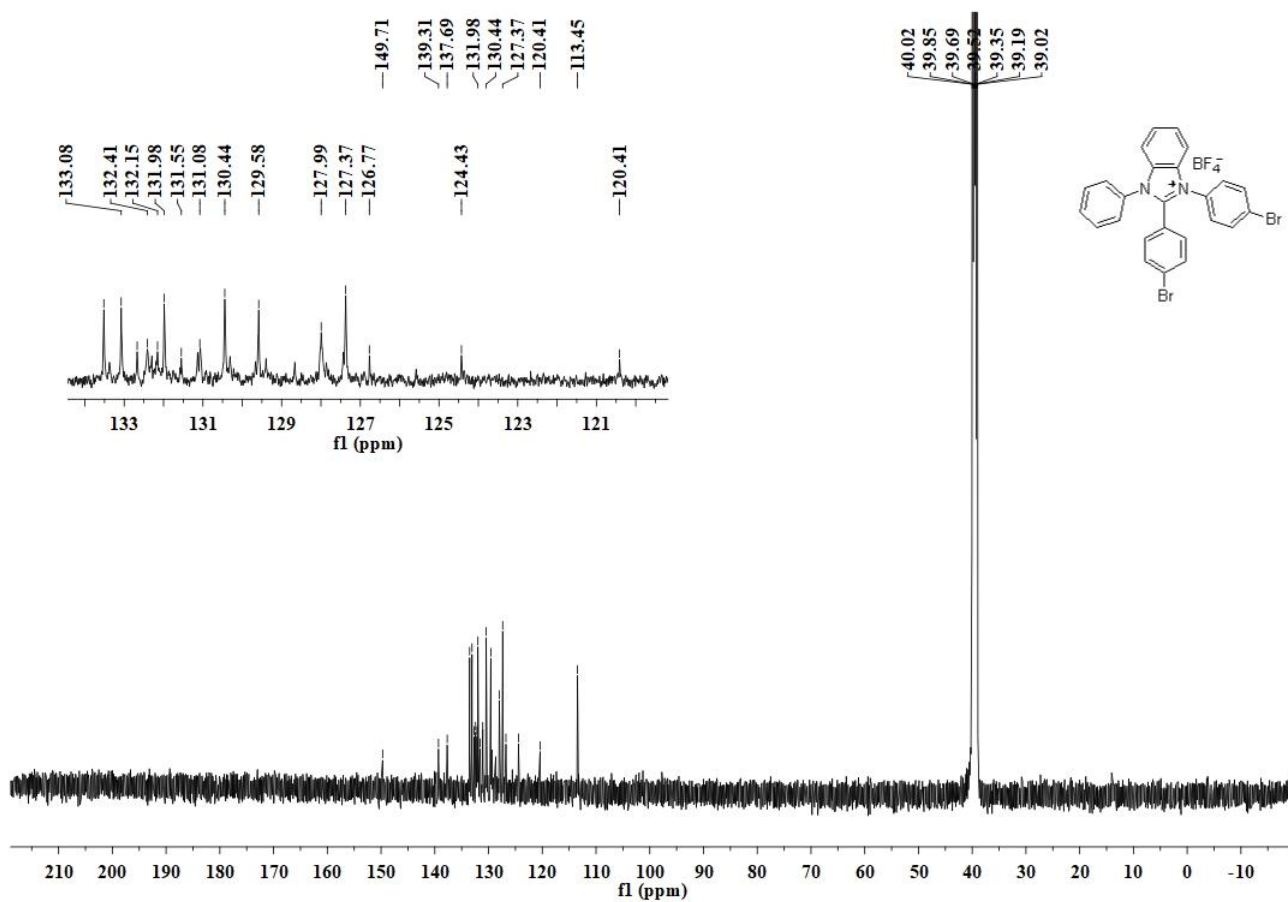

<sup>1</sup>H NMR (500 MHz, CDCl<sub>3</sub>) of **5g**

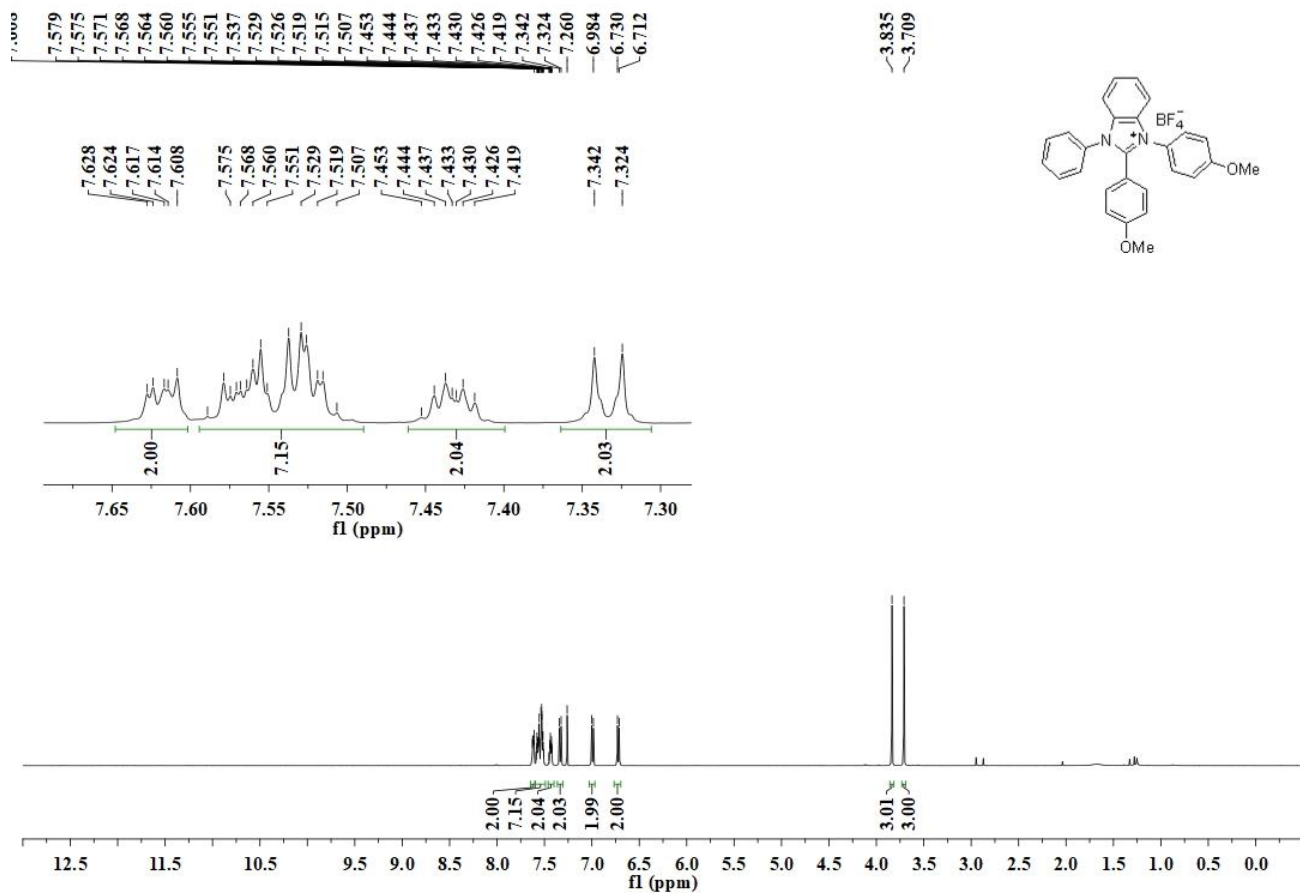

<sup>13</sup>C NMR (126 MHz, CDCl<sub>3</sub>) of **5g**

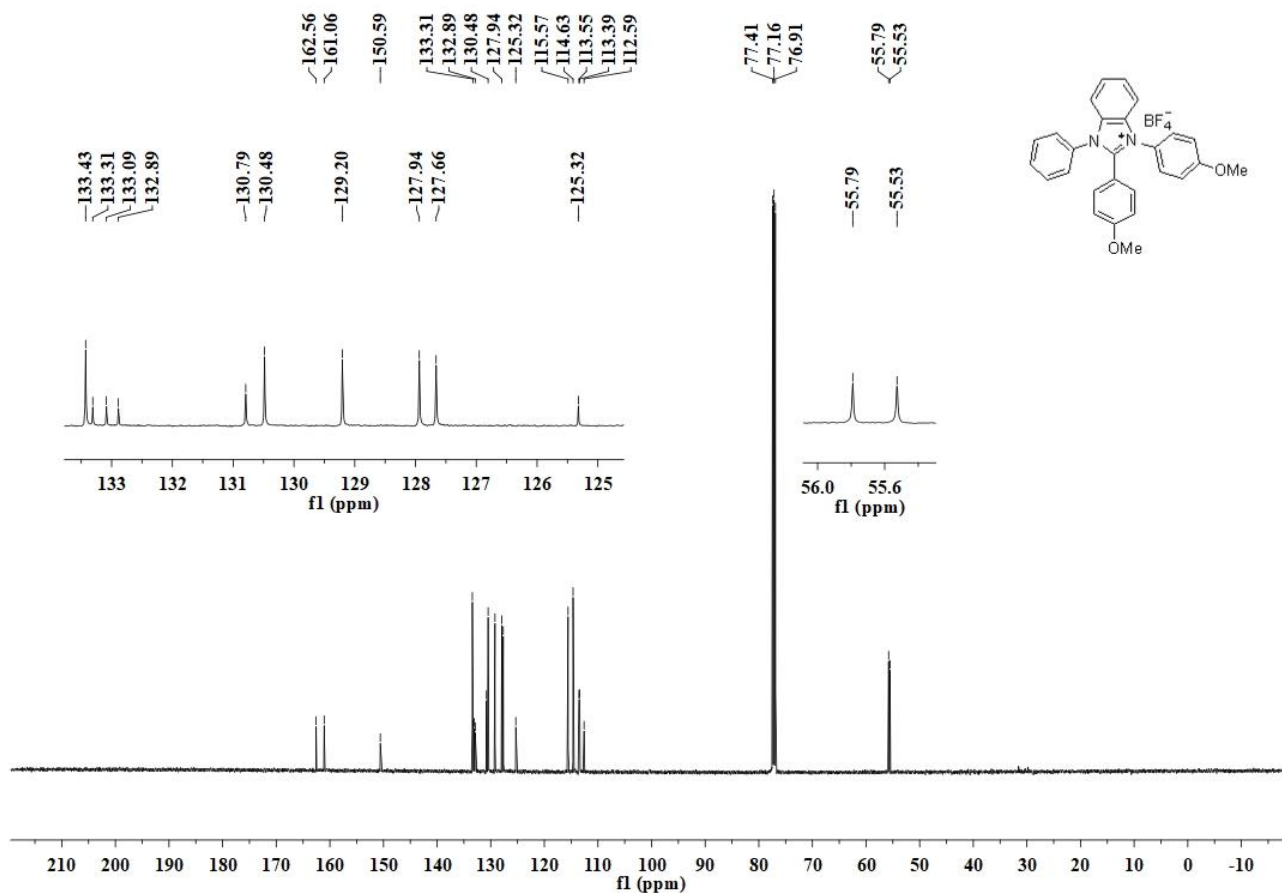

$^1\text{H}$  NMR (400 MHz,  $\text{CDCl}_3$ ) of **5h**

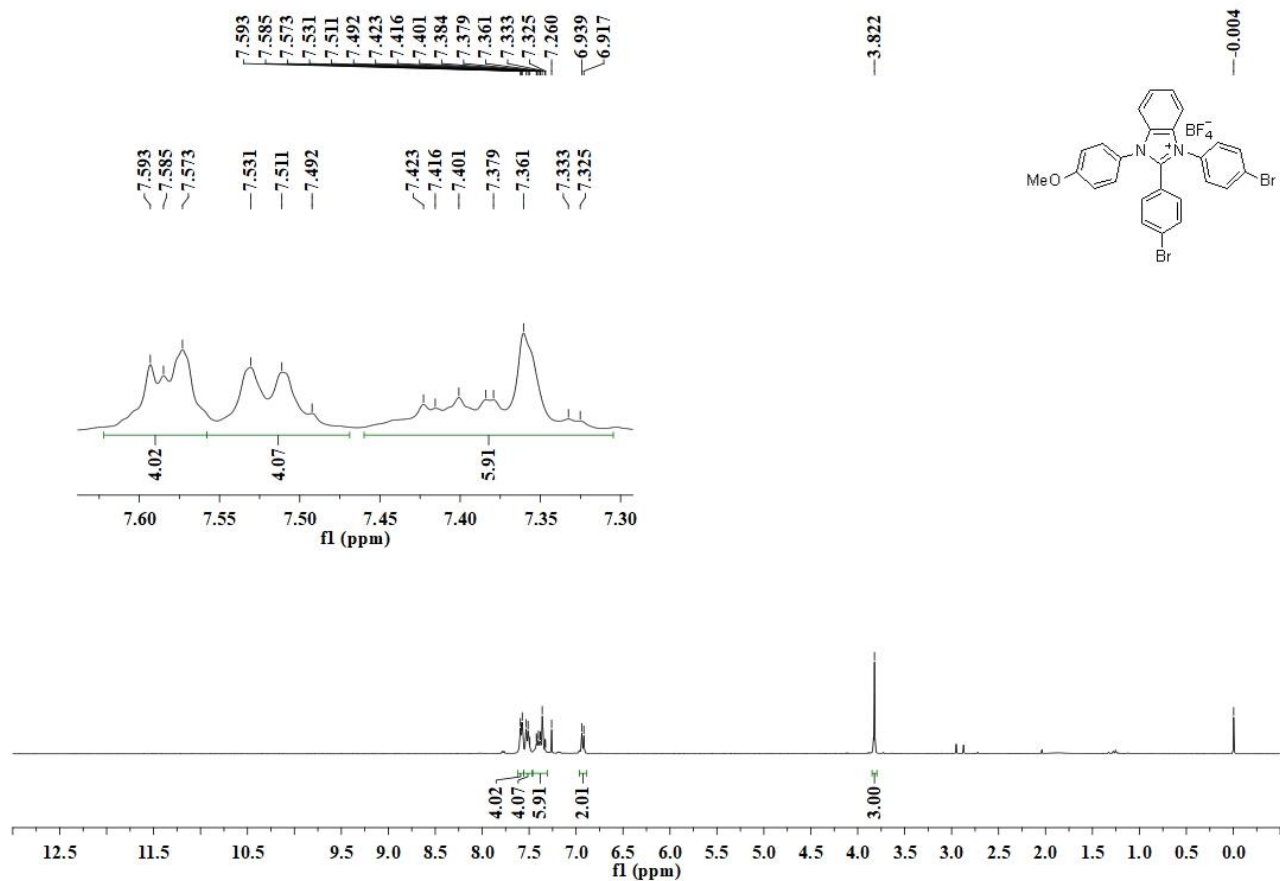

$^{13}\text{C}$  NMR (101 MHz,  $\text{CDCl}_3$ ) of **5h**

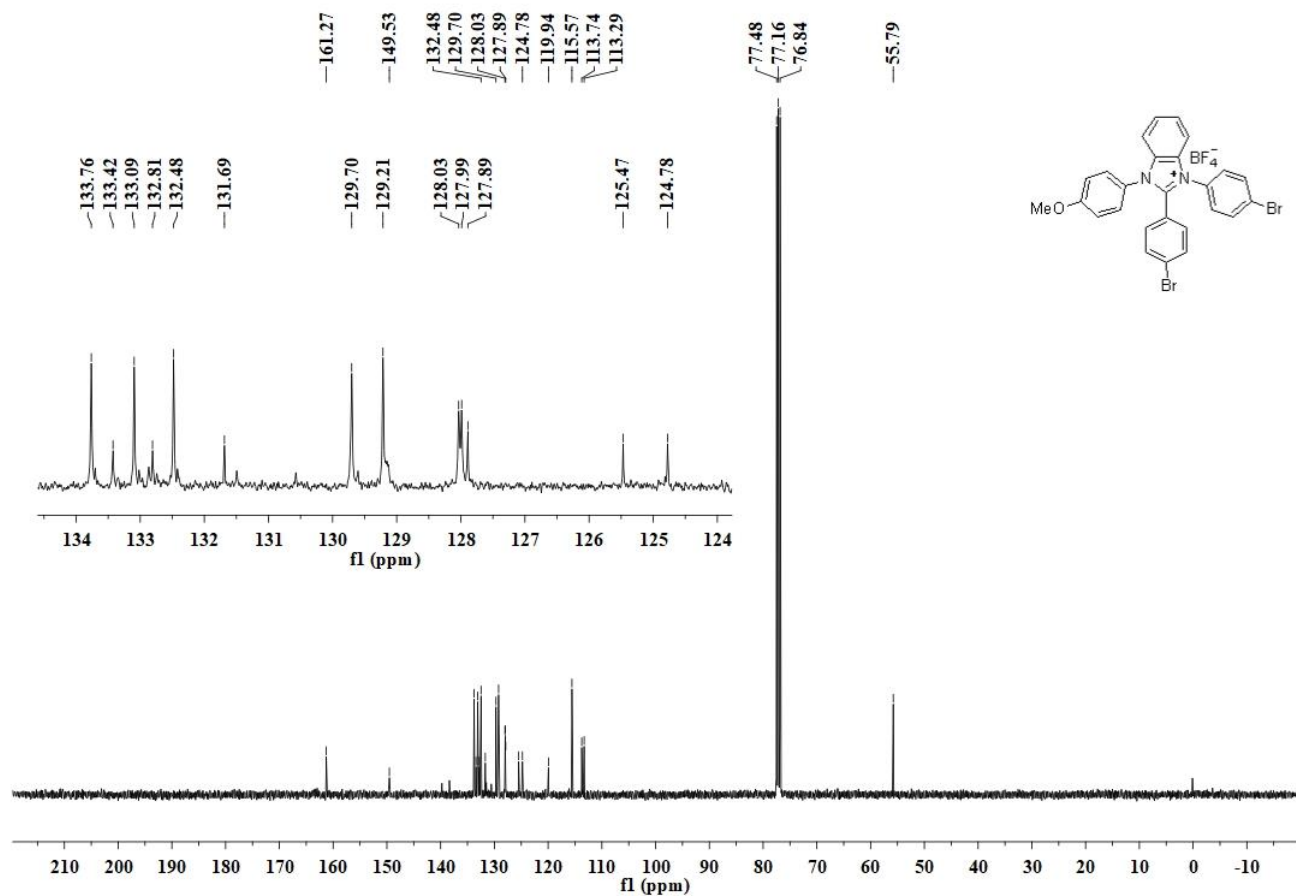

<sup>1</sup>H NMR (500 MHz, CDCl<sub>3</sub>) of **5i**

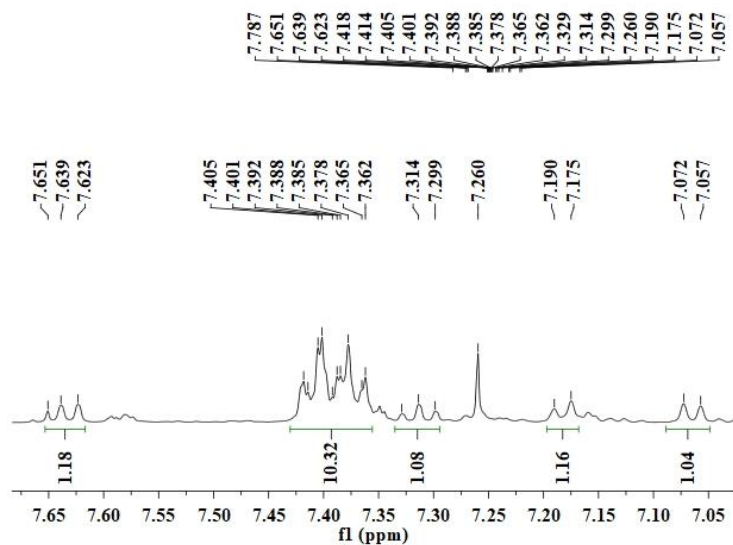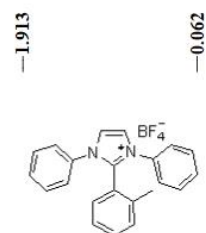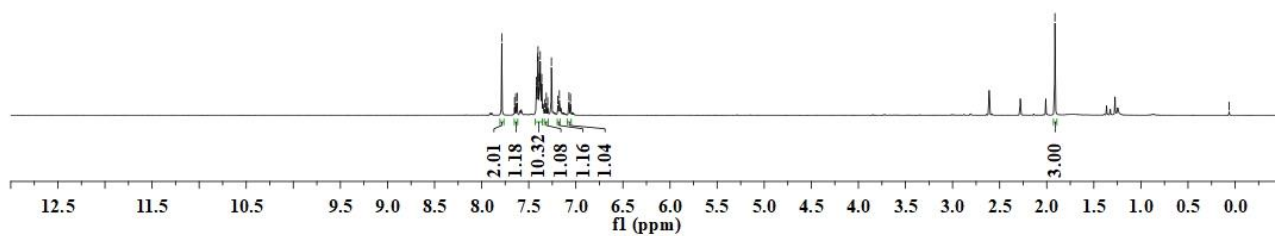

<sup>13</sup>C NMR (126 MHz, CDCl<sub>3</sub>) of **5i**

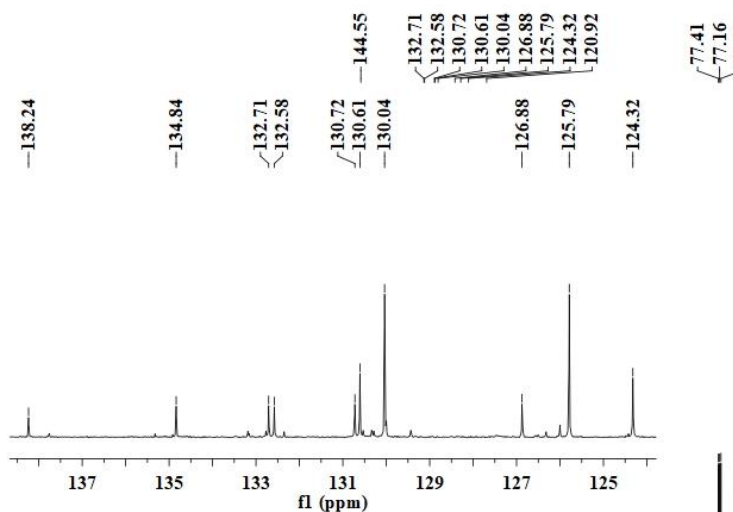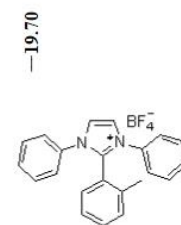

<sup>1</sup>H NMR (500 MHz, CDCl<sub>3</sub>) of **5j**

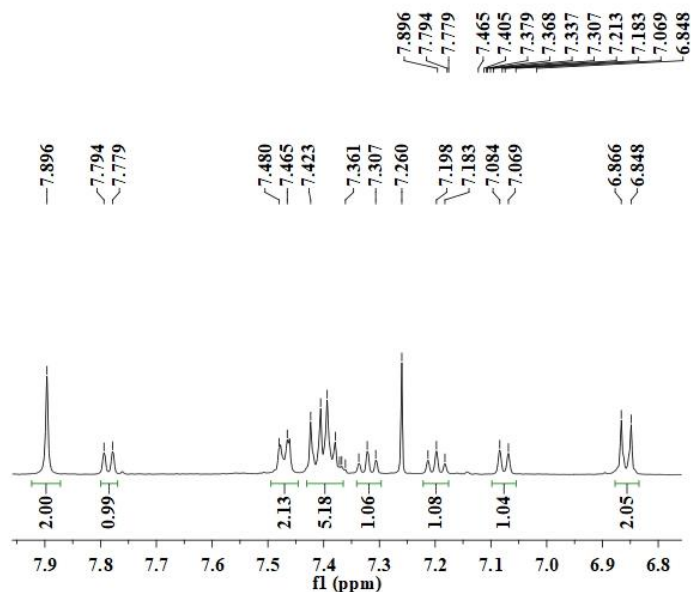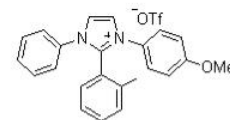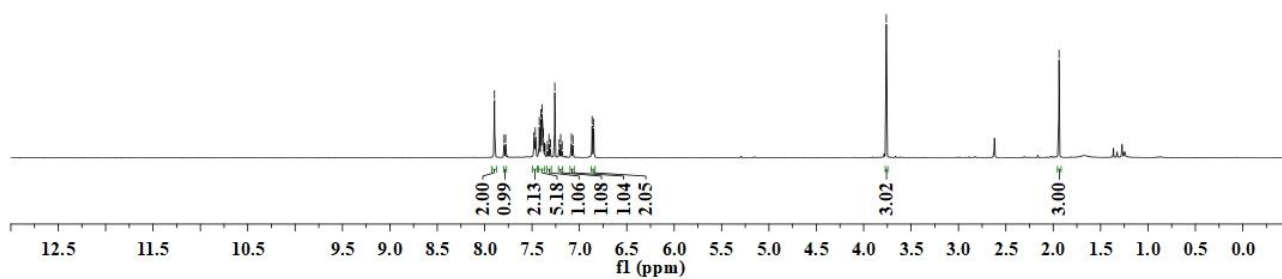

<sup>13</sup>C NMR (126 MHz, CDCl<sub>3</sub>) of **5j**

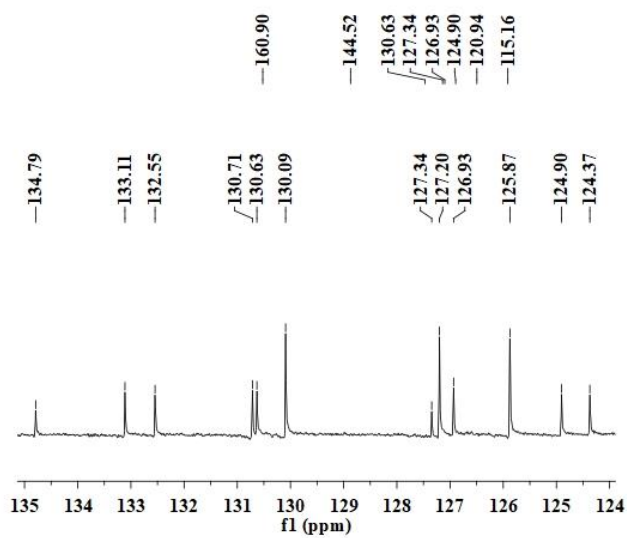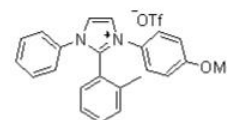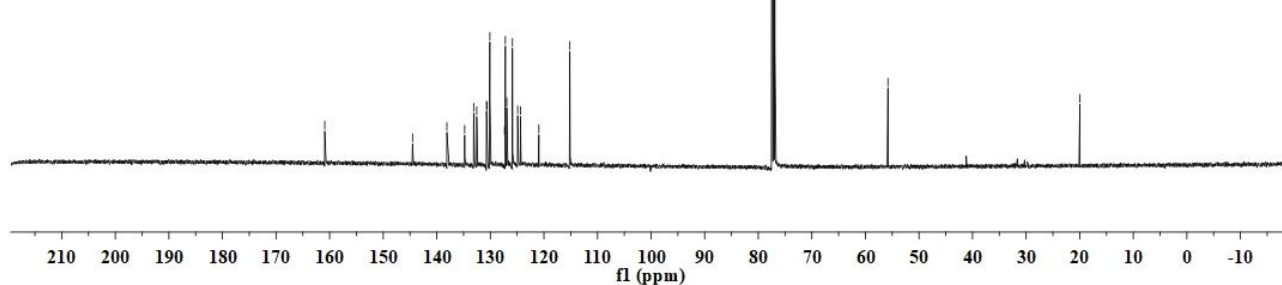

$^1\text{H}$  NMR (500 MHz,  $\text{CDCl}_3$ ) of **5k/5k'**

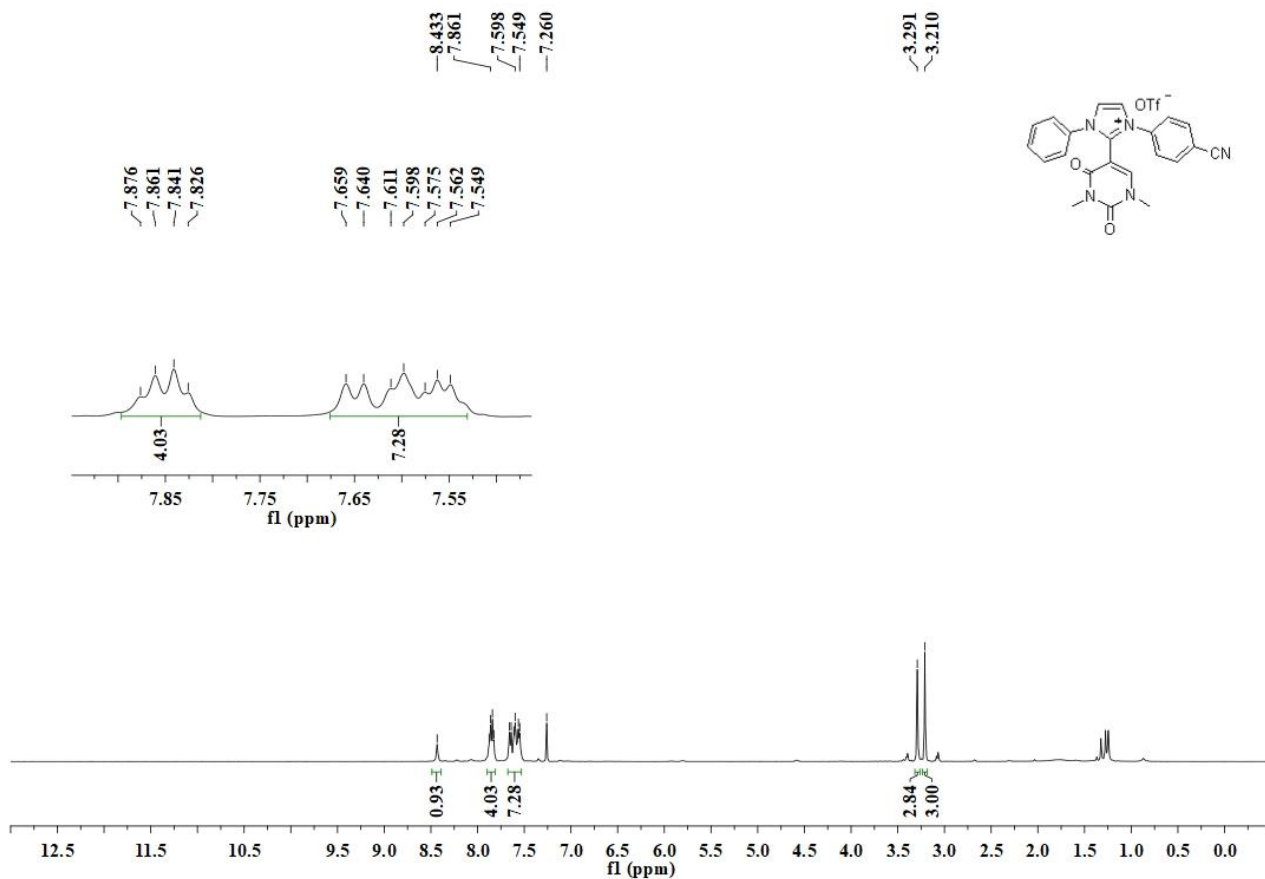

$^{13}\text{C}$  NMR (126 MHz,  $\text{CDCl}_3$ ) of **5k/5k'**

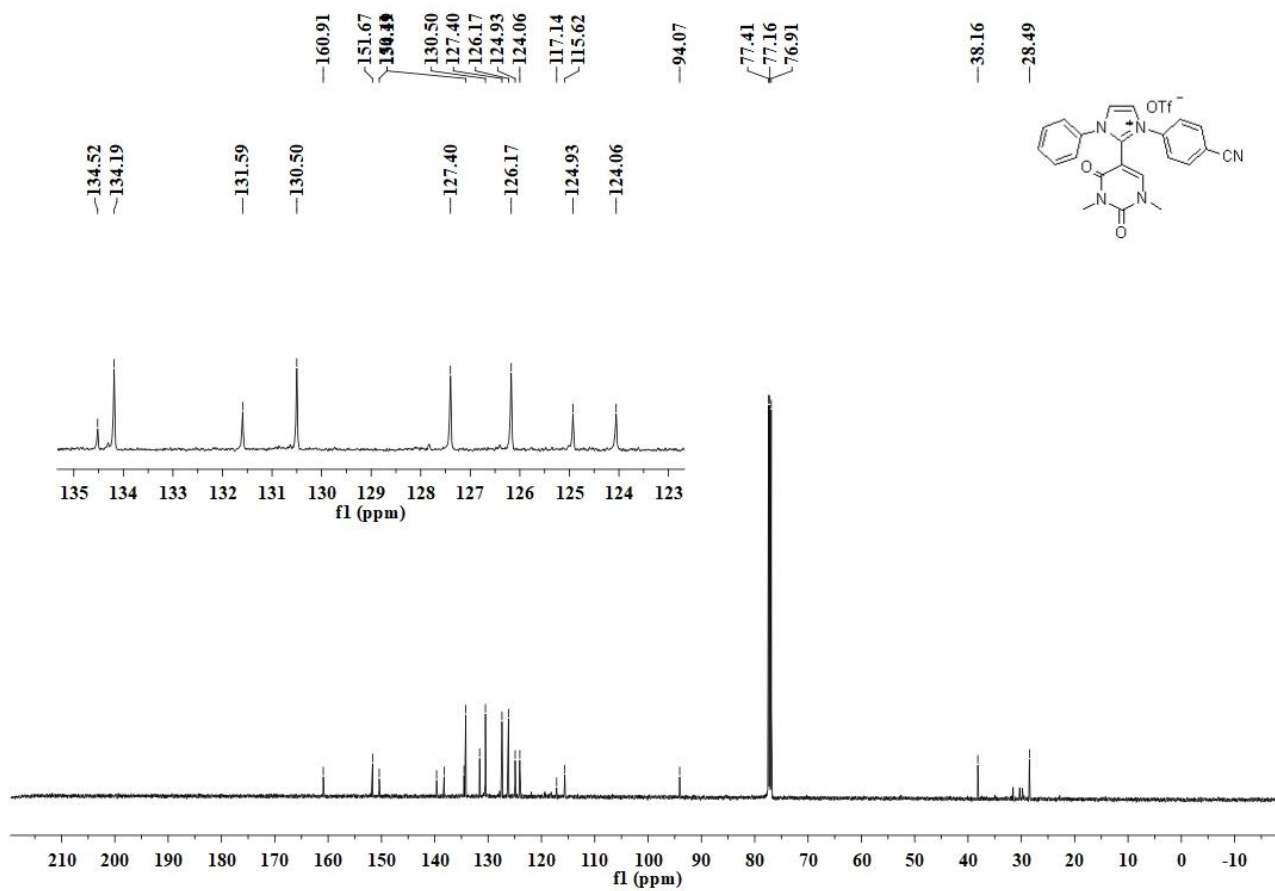

<sup>1</sup>H NMR (400 MHz, DMSO-*d*<sub>6</sub>) of **51**

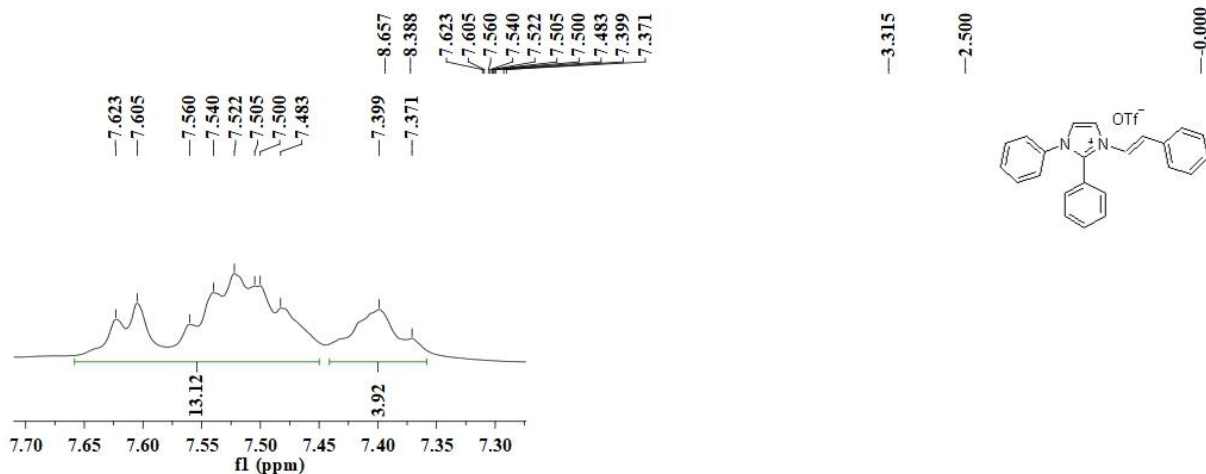

<sup>13</sup>C NMR (101 MHz, DMSO-*d*<sub>6</sub>) of **51**

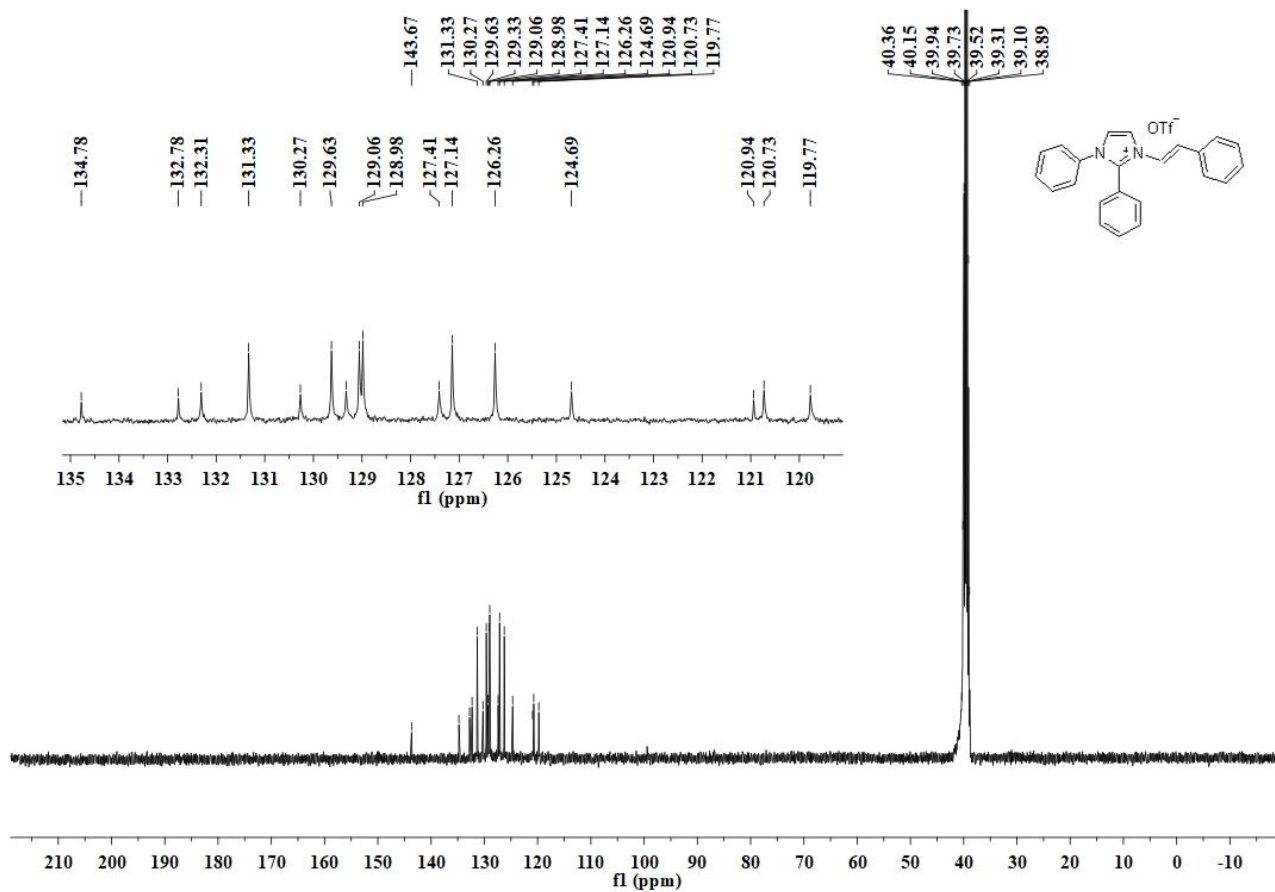

$^1\text{H}$  NMR (400 MHz,  $\text{DMSO-}d_6$ ) of **7b**

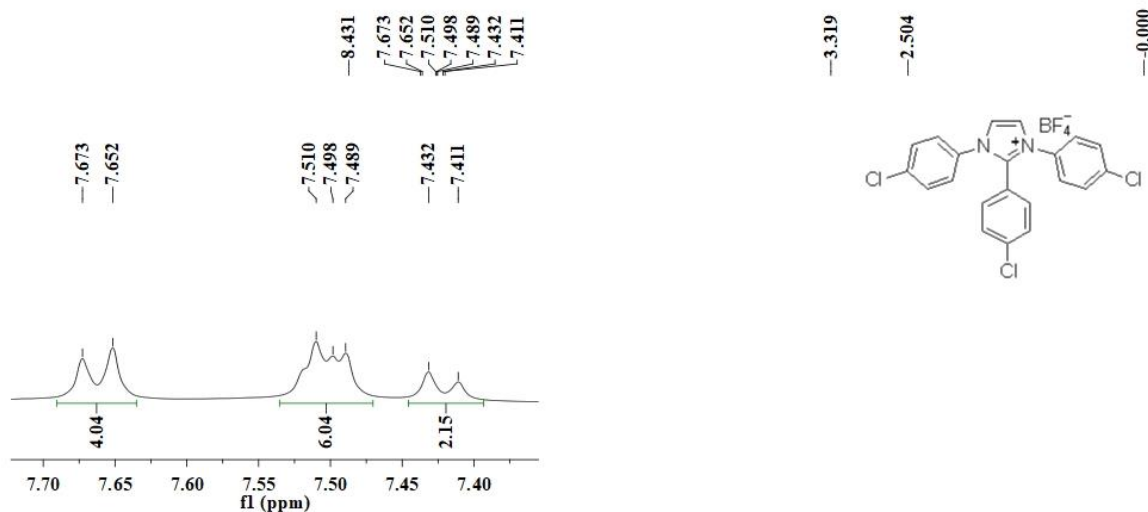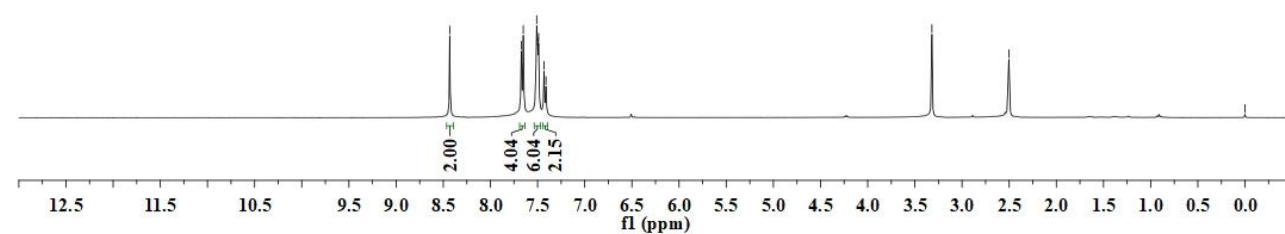

$^{13}\text{C}$  NMR (101 MHz,  $\text{DMSO-}d_6$ ) of **7b**

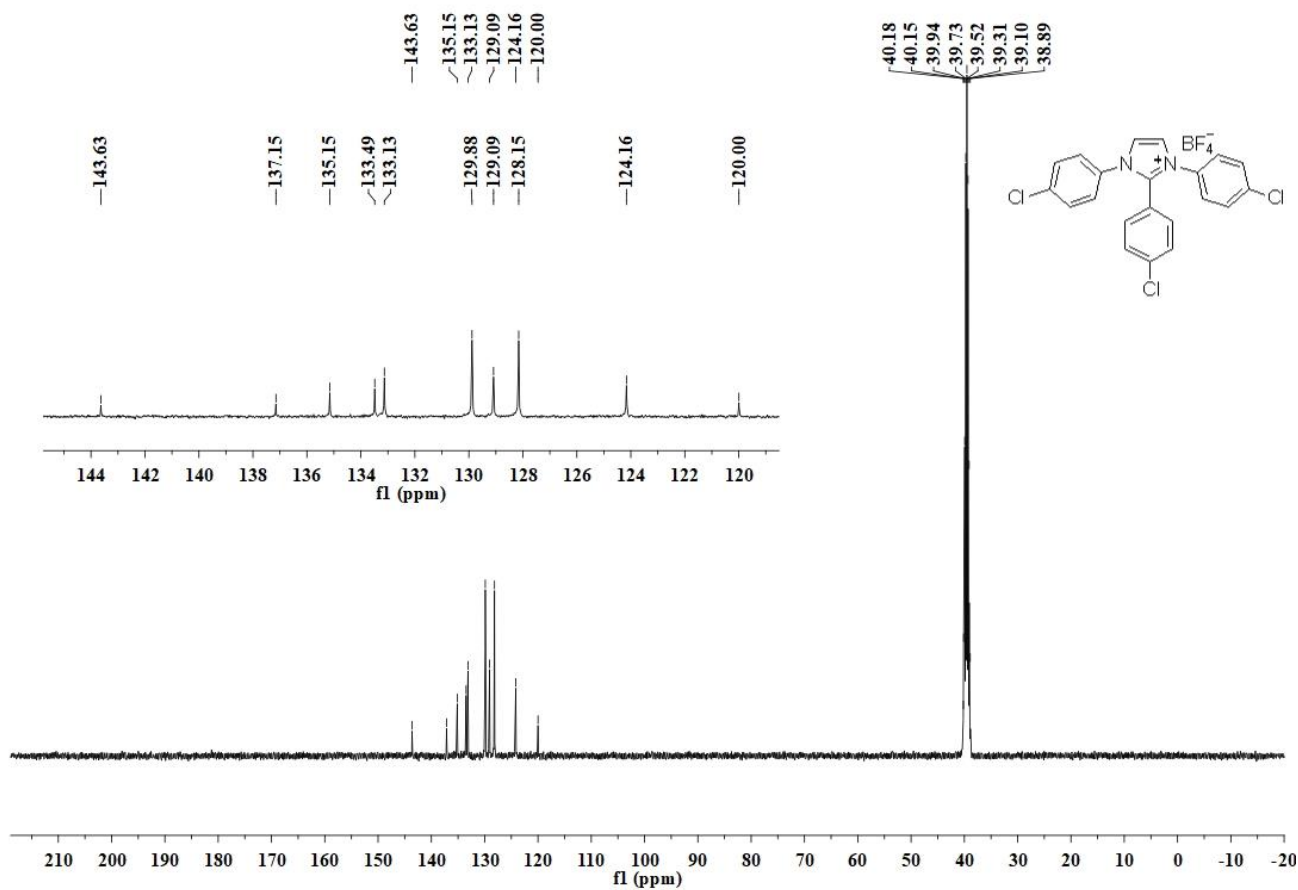



<sup>1</sup>H NMR (400 MHz, DMSO-*d*<sub>6</sub>) of **7d**

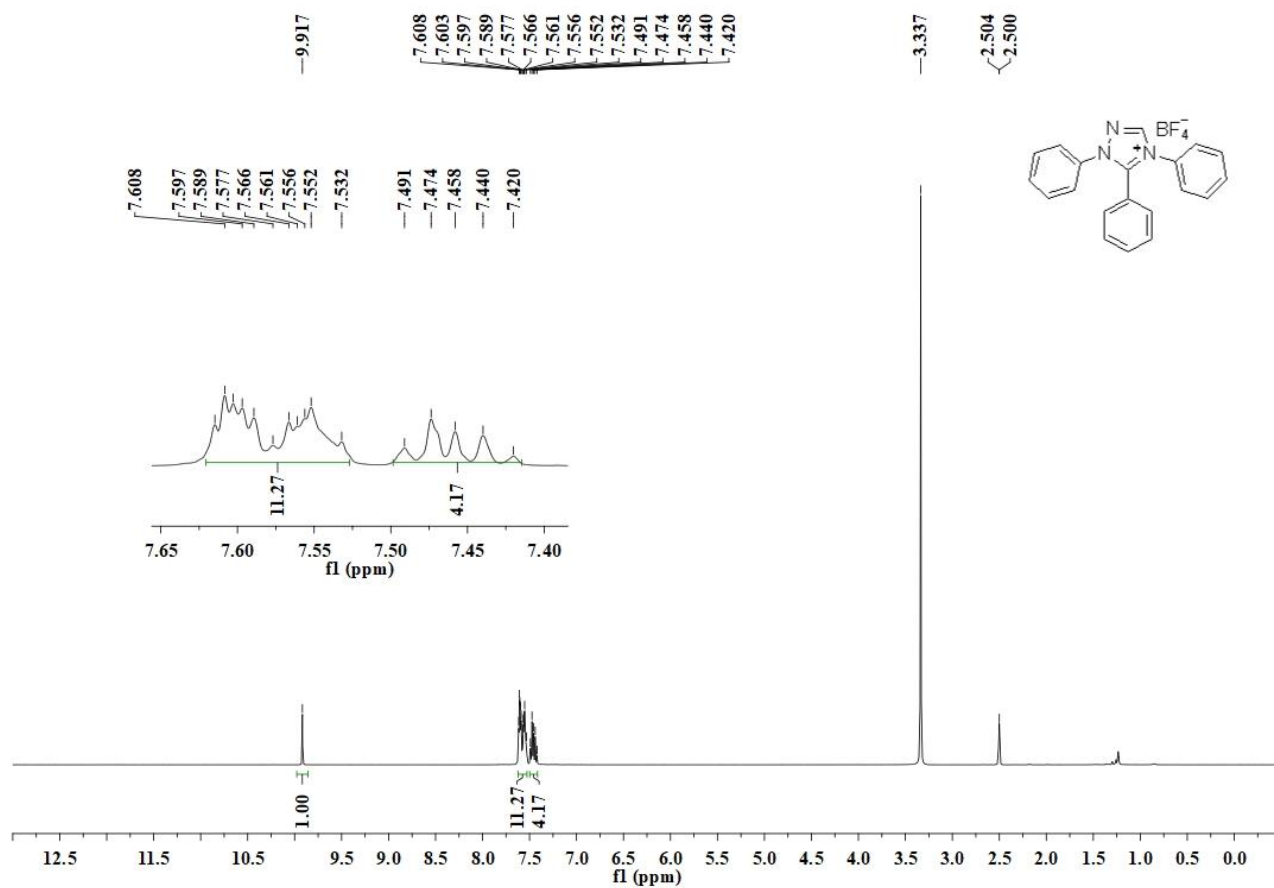

<sup>13</sup>C NMR (101 MHz, DMSO-*d*<sub>6</sub>) of **7d**

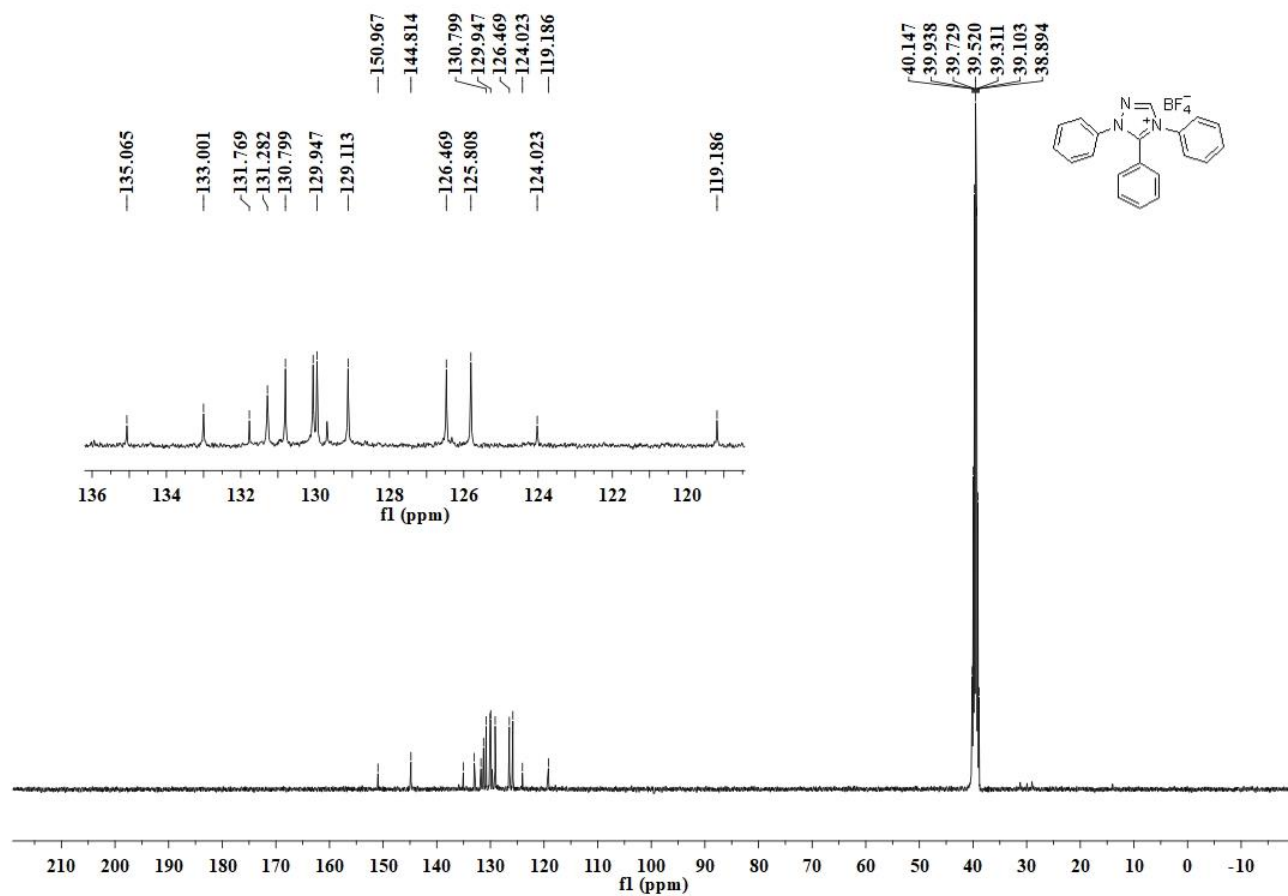

$^1\text{H}$  NMR (400 MHz,  $\text{DMSO-}d_6$ ) of **8a**

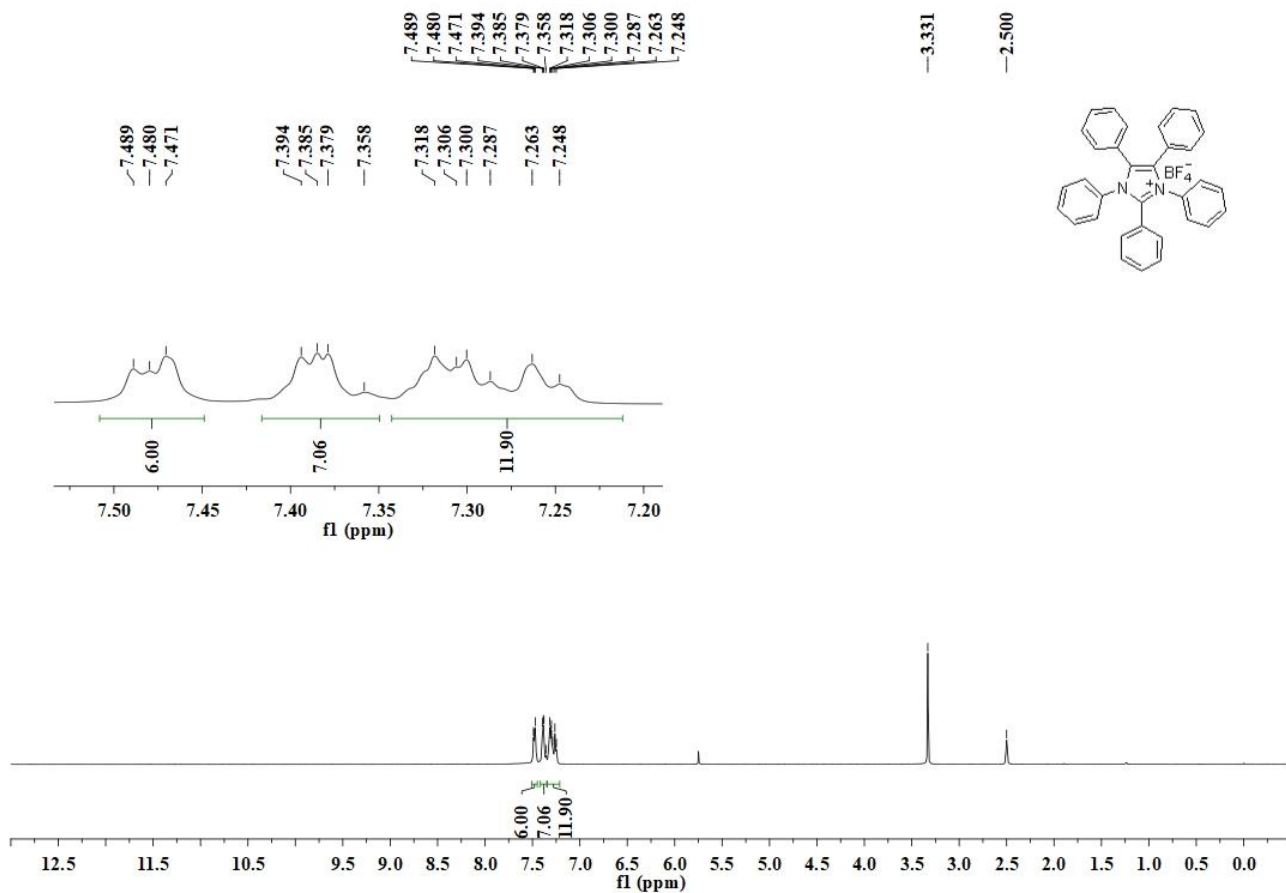

$^{13}\text{C}$  NMR (101 MHz,  $\text{DMSO-}d_6$ ) of **8a**

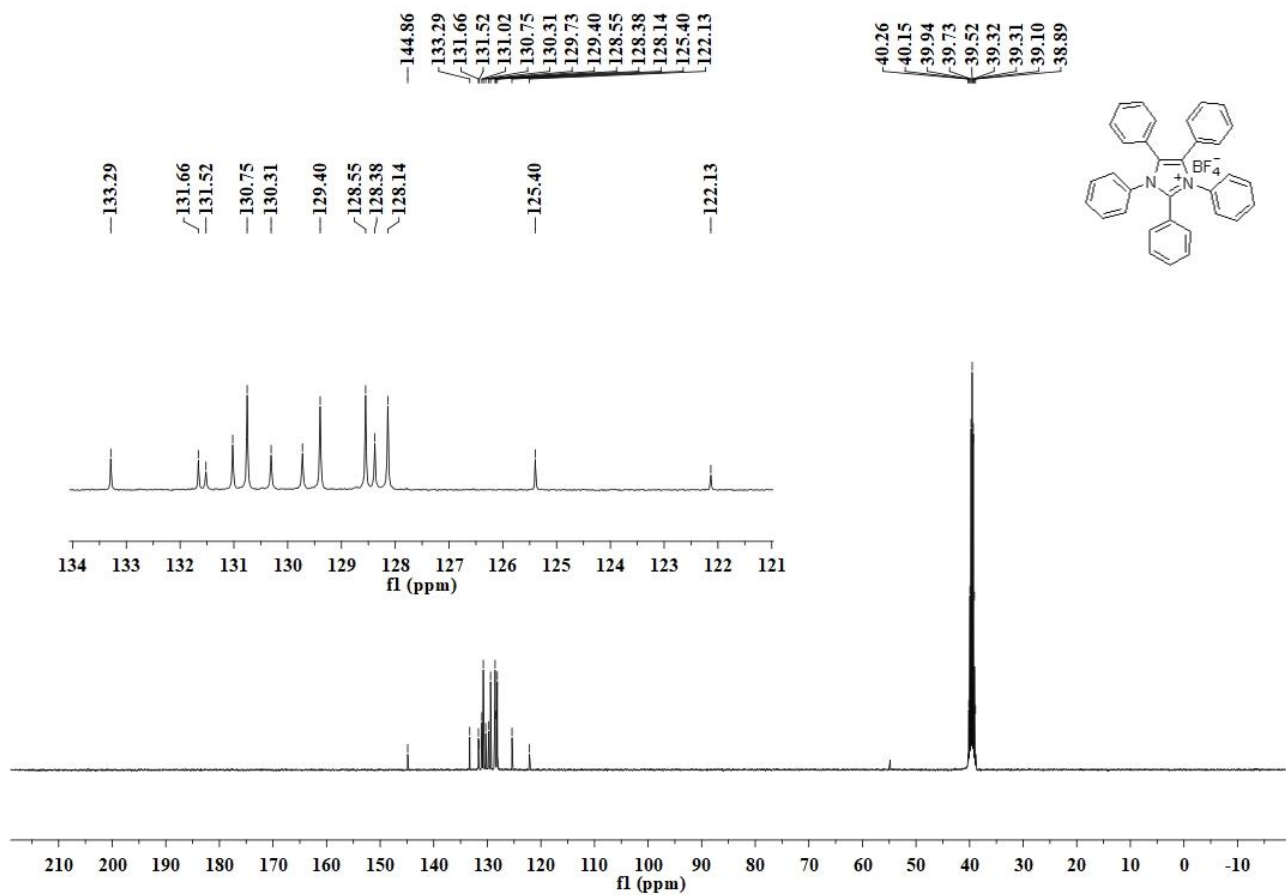

$^1\text{H}$  NMR (400 MHz,  $\text{DMSO-}d_6$ ) of **8b**

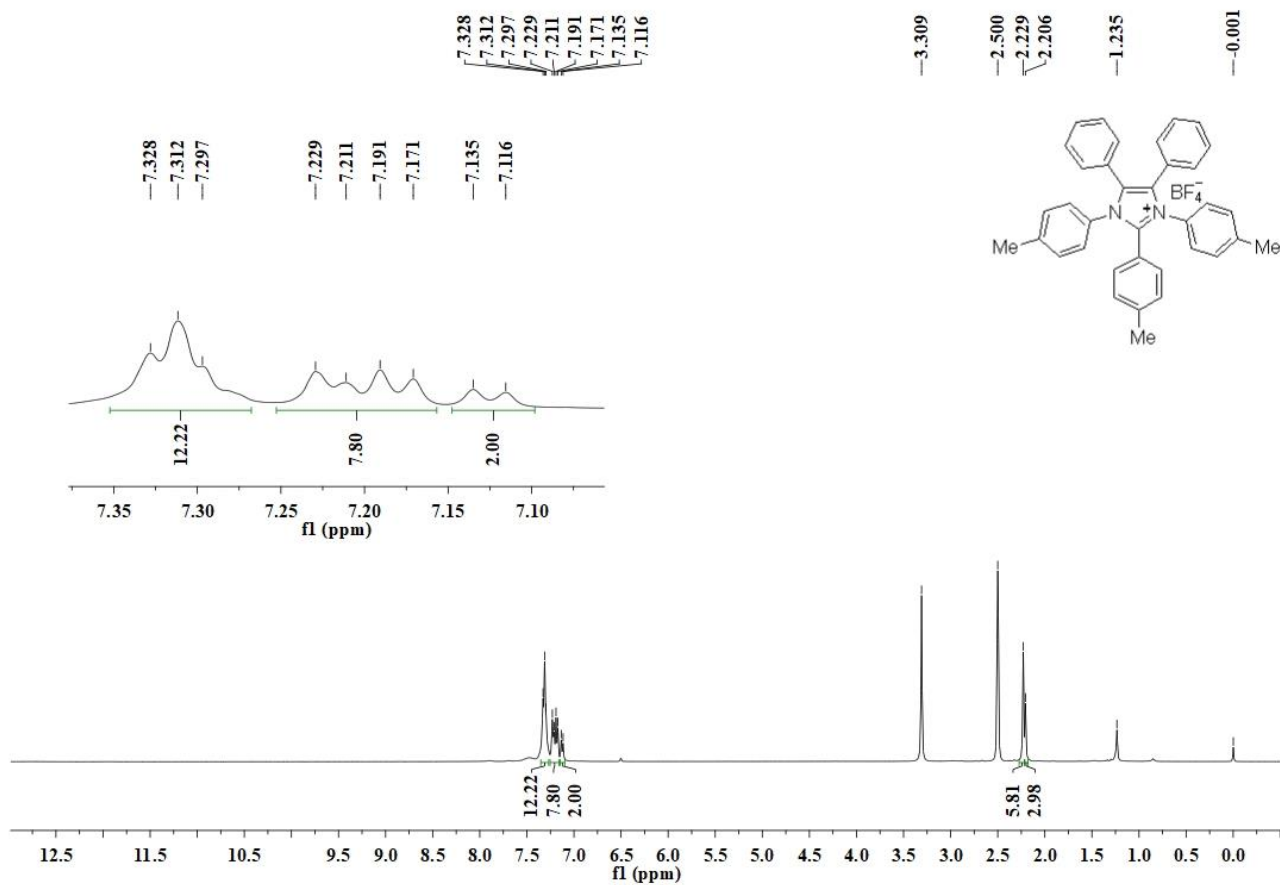

$^{13}\text{C}$  NMR (101 MHz,  $\text{DMSO-}d_6$ ) of **8b**

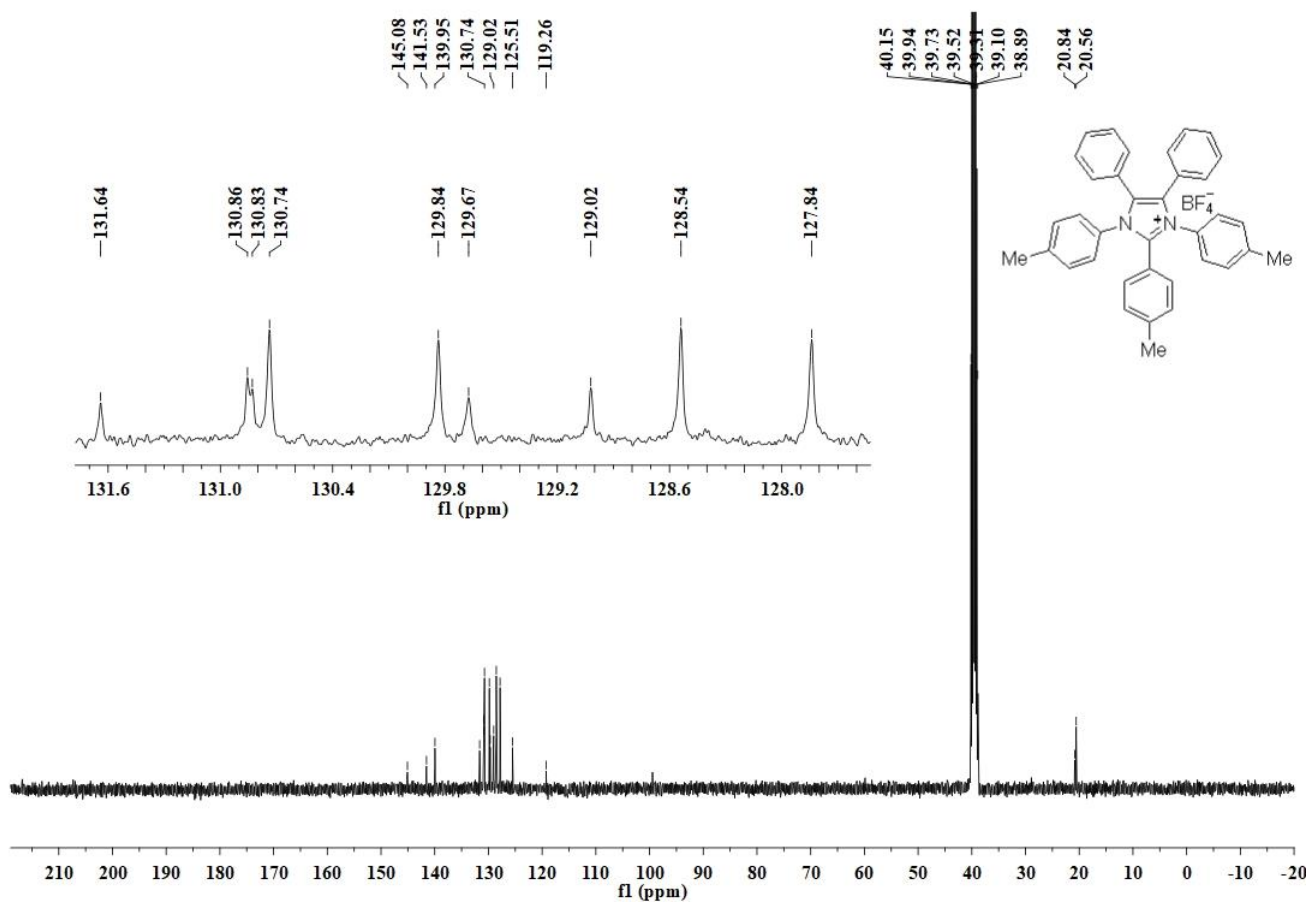

<sup>1</sup>H NMR (400 MHz, DMSO-*d*<sub>6</sub>) of **8c**

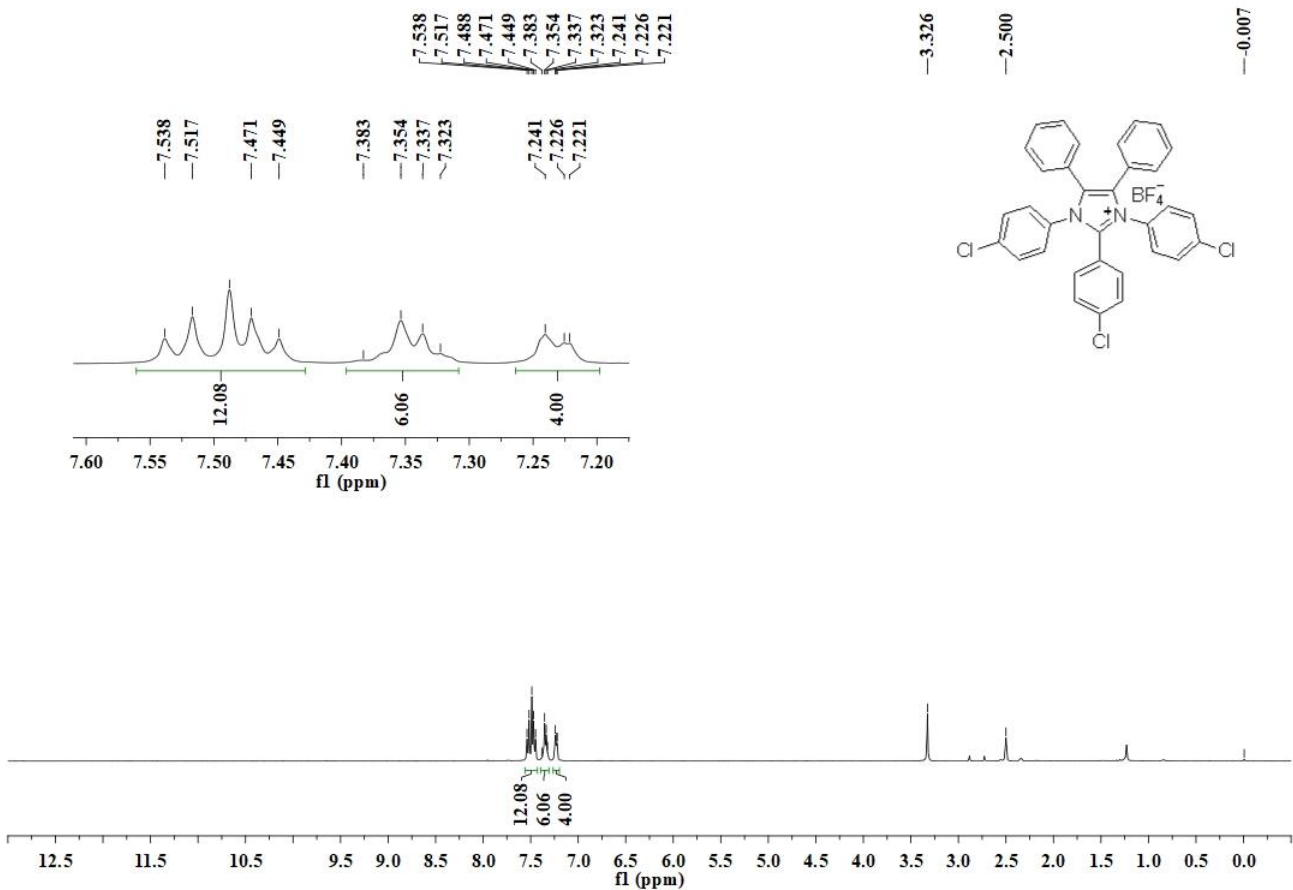

<sup>13</sup>C NMR (101 MHz, DMSO-*d*<sub>6</sub>) of **8c**

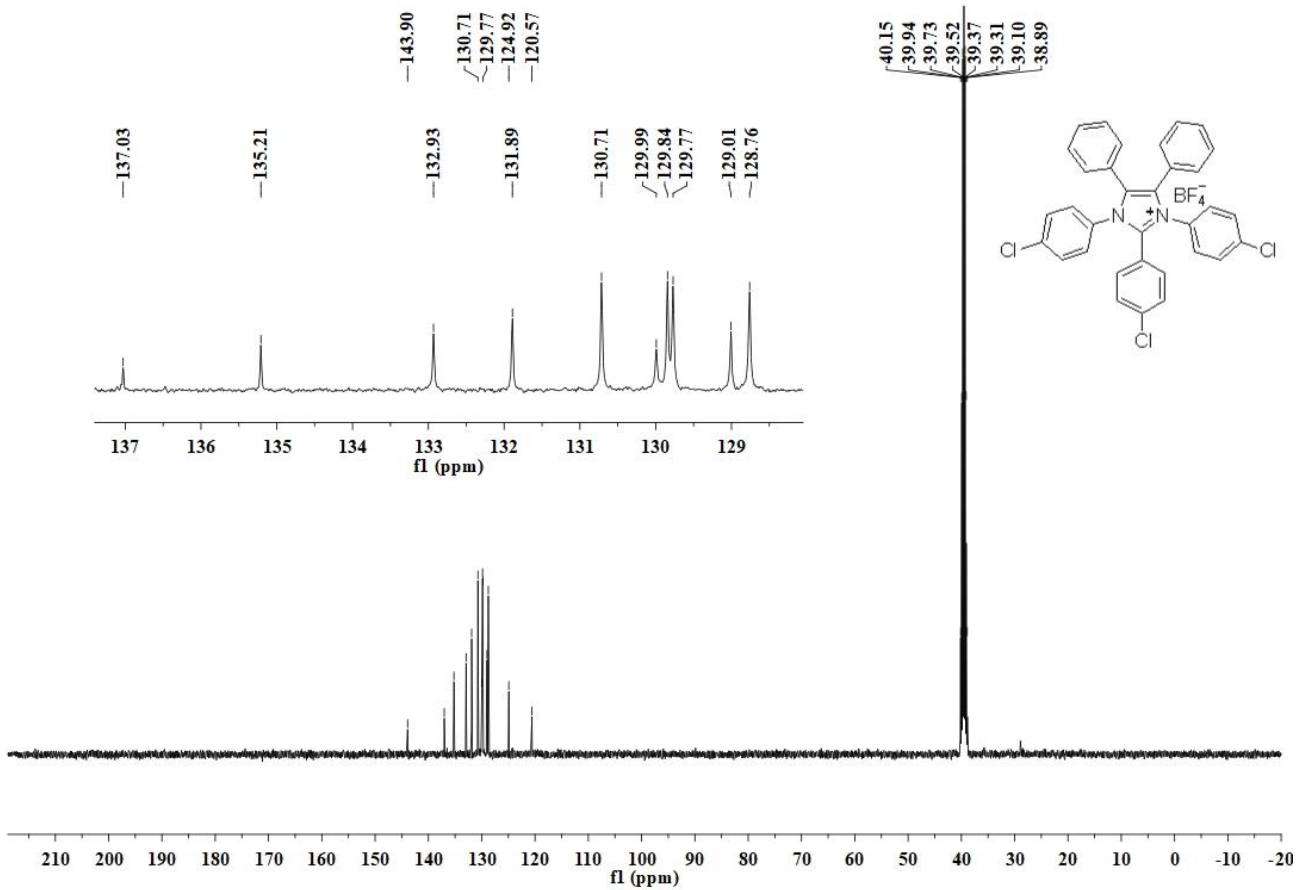

$^1\text{H}$  NMR (500 MHz, DMSO-*d*<sub>6</sub>) of **8d**

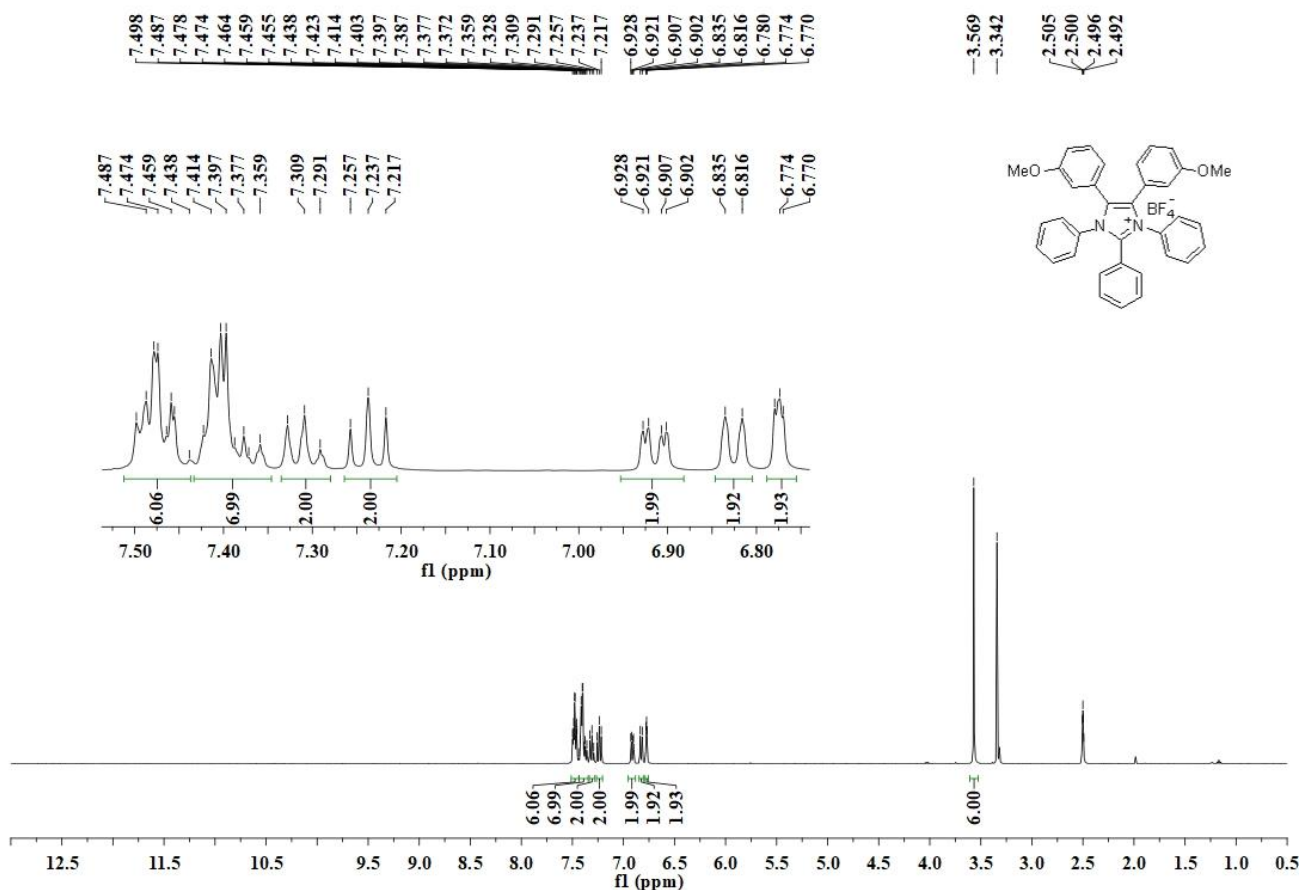

$^{13}\text{C}$  NMR (126 MHz, DMSO-*d*<sub>6</sub>) of **8d**

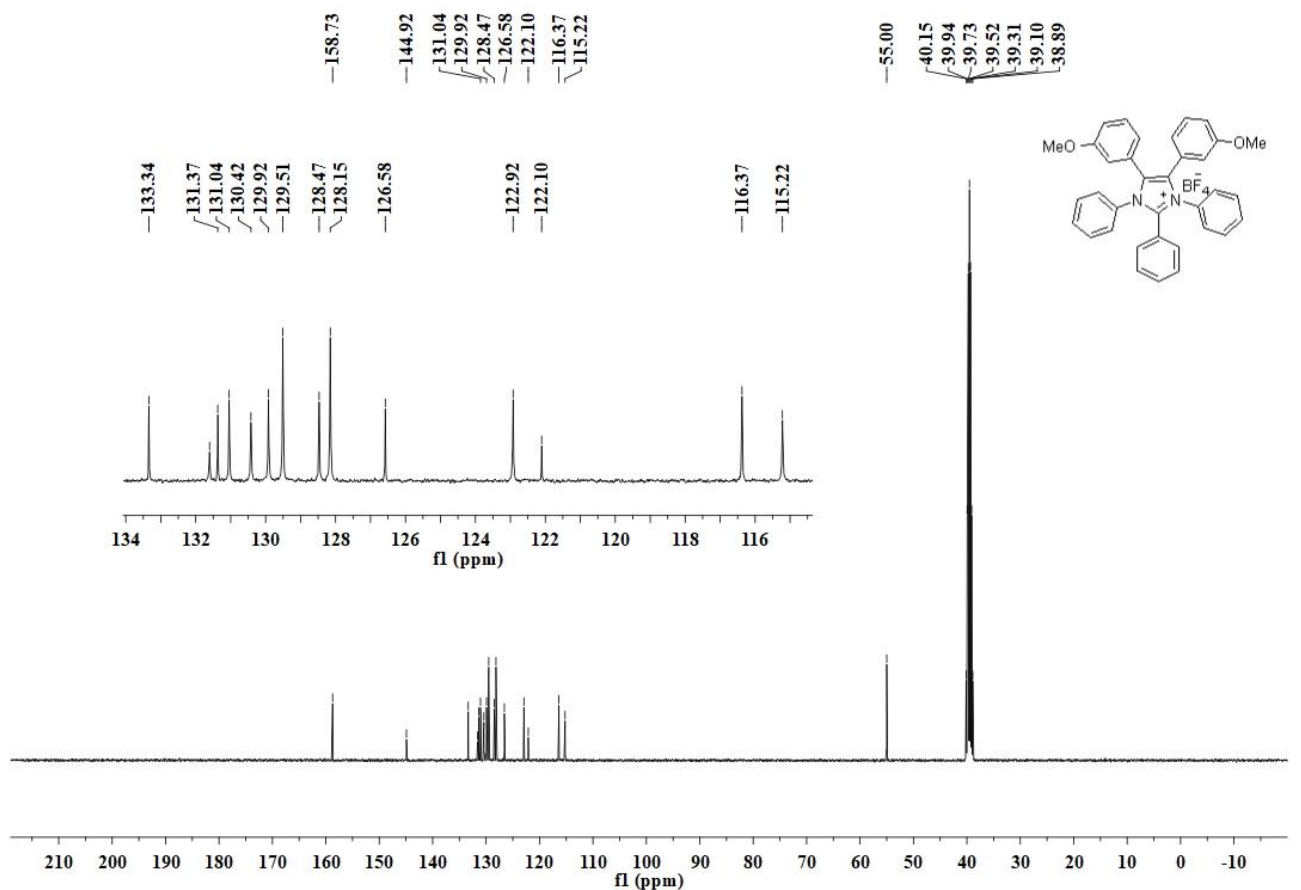

$^1\text{H}$  NMR (500 MHz,  $\text{DMSO-}d_6$ ) of **8e**

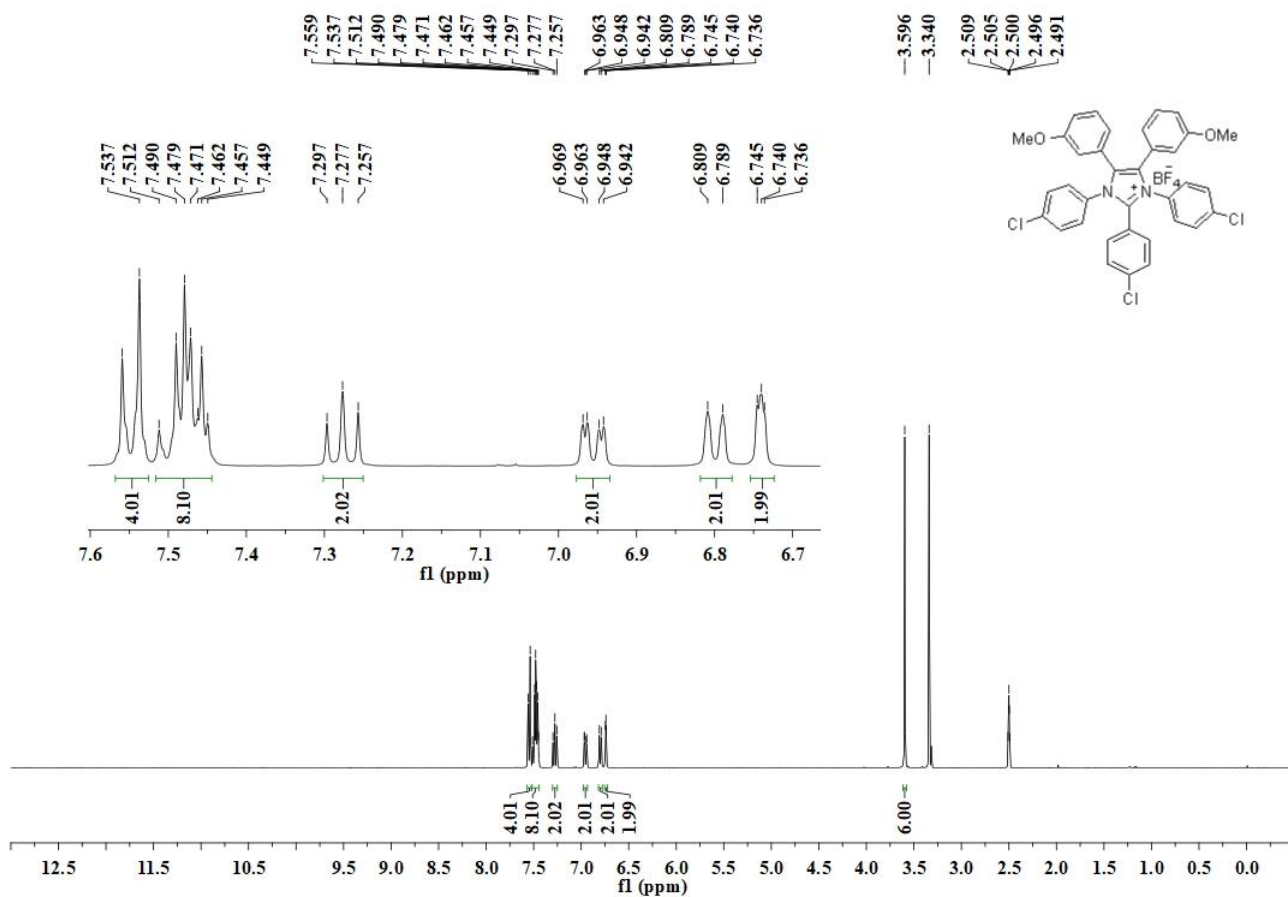

$^{13}\text{C}$  NMR (126 MHz,  $\text{DMSO-}d_6$ ) of **8e**

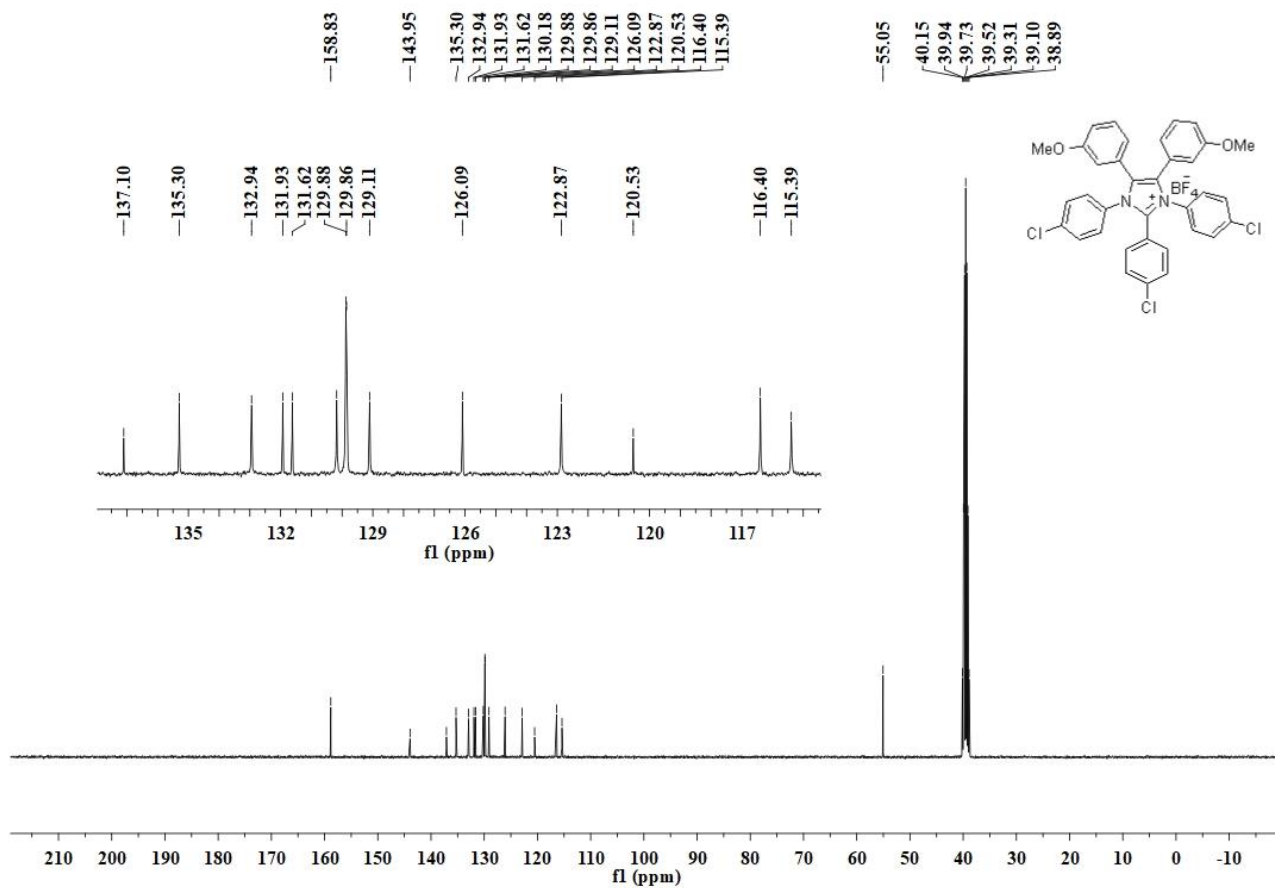

$^1\text{H}$  NMR (400 MHz, DMSO-*d*<sub>6</sub>) of **8f**

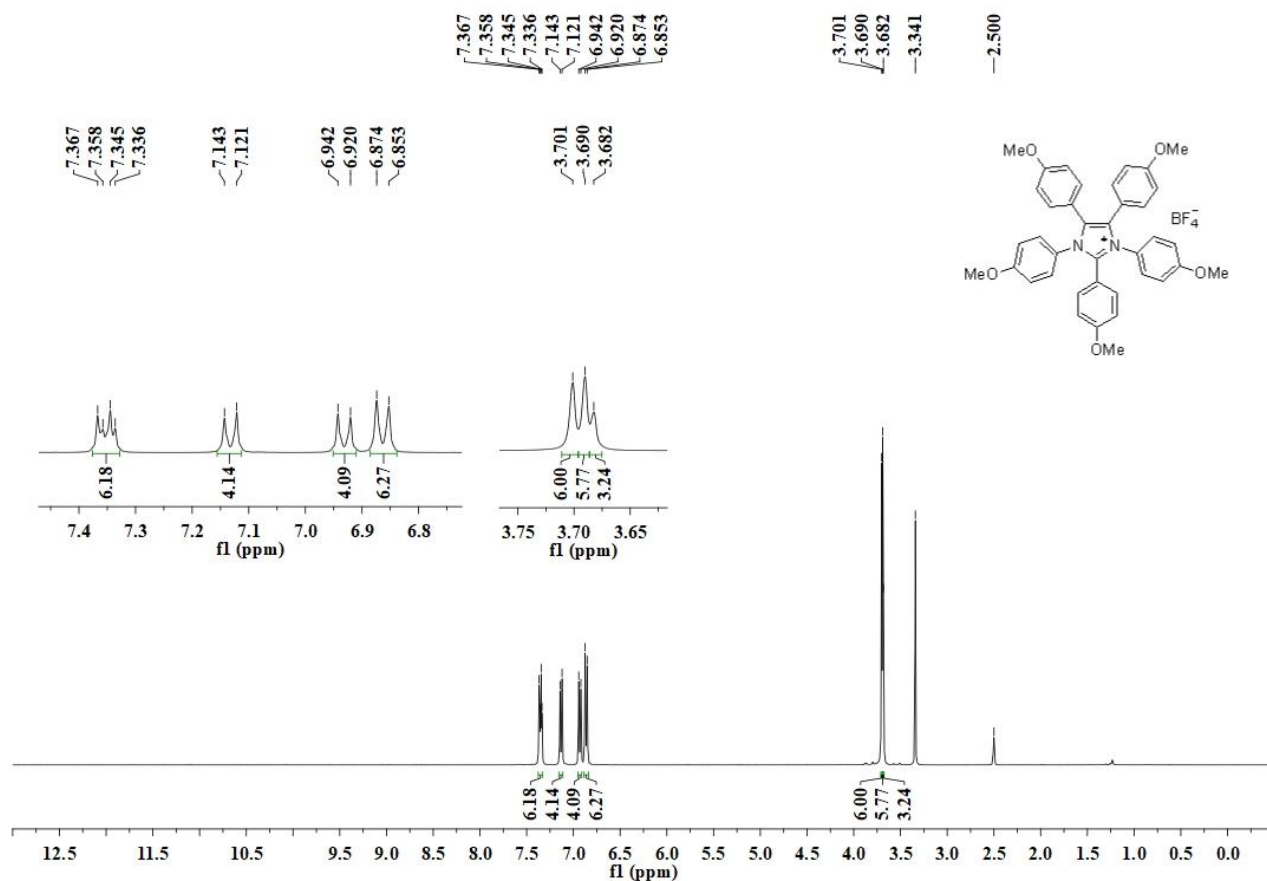

$^{13}\text{C}$  NMR (101 MHz, DMSO-*d*<sub>6</sub>) of **8f**

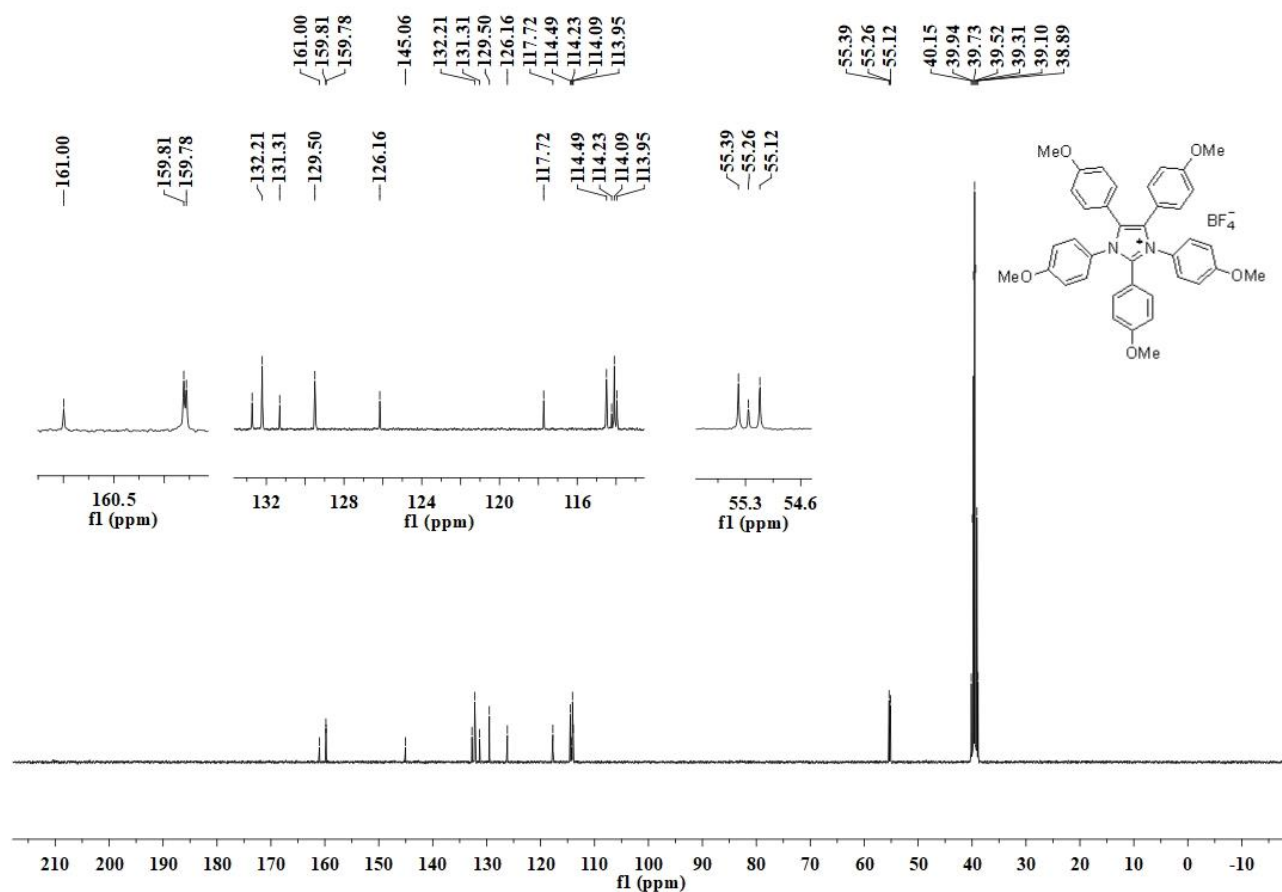

$^1\text{H}$  NMR (400 MHz, DMSO-*d*<sub>6</sub>) of **8f-OTs**

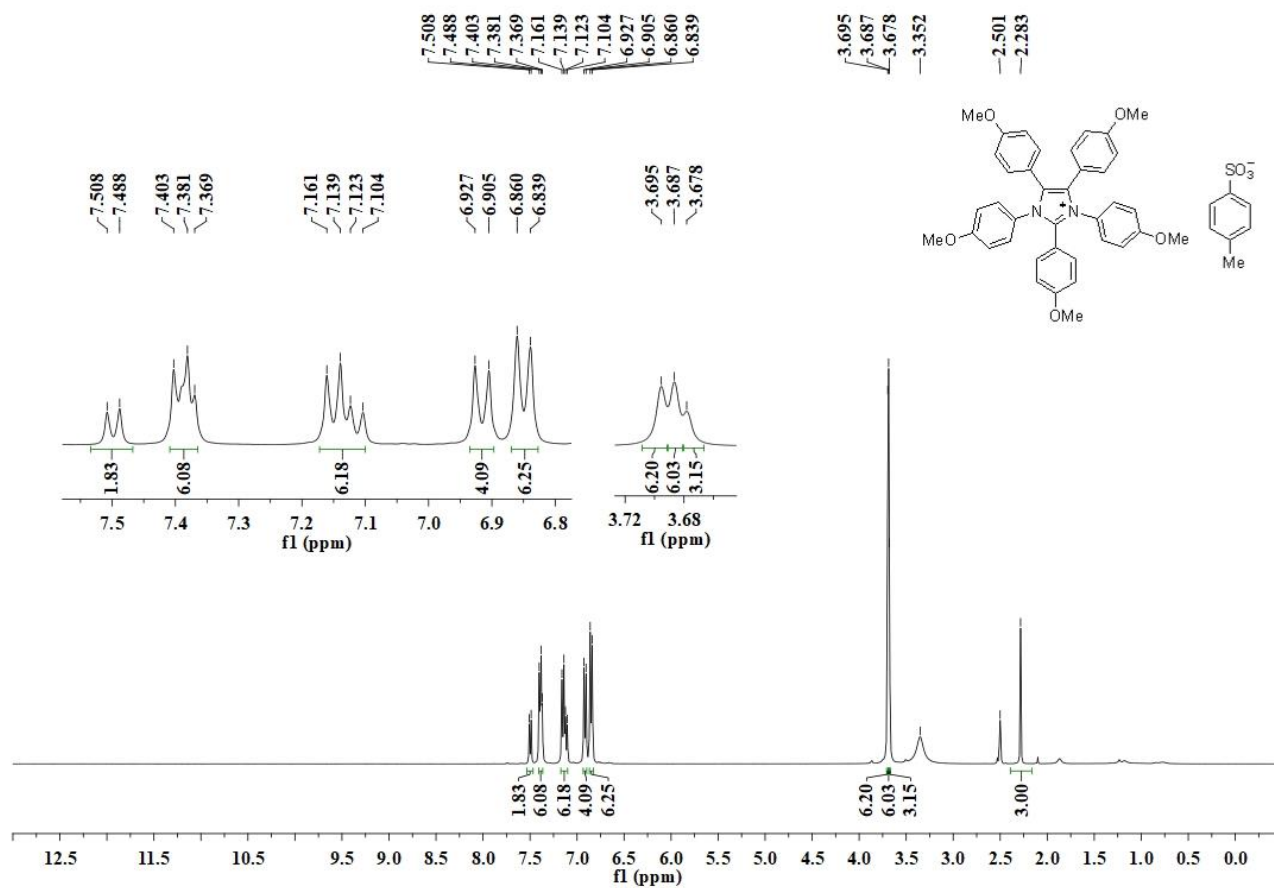

$^{13}\text{C}$  NMR (101 MHz, DMSO-*d*<sub>6</sub>) of **8f-OTs**

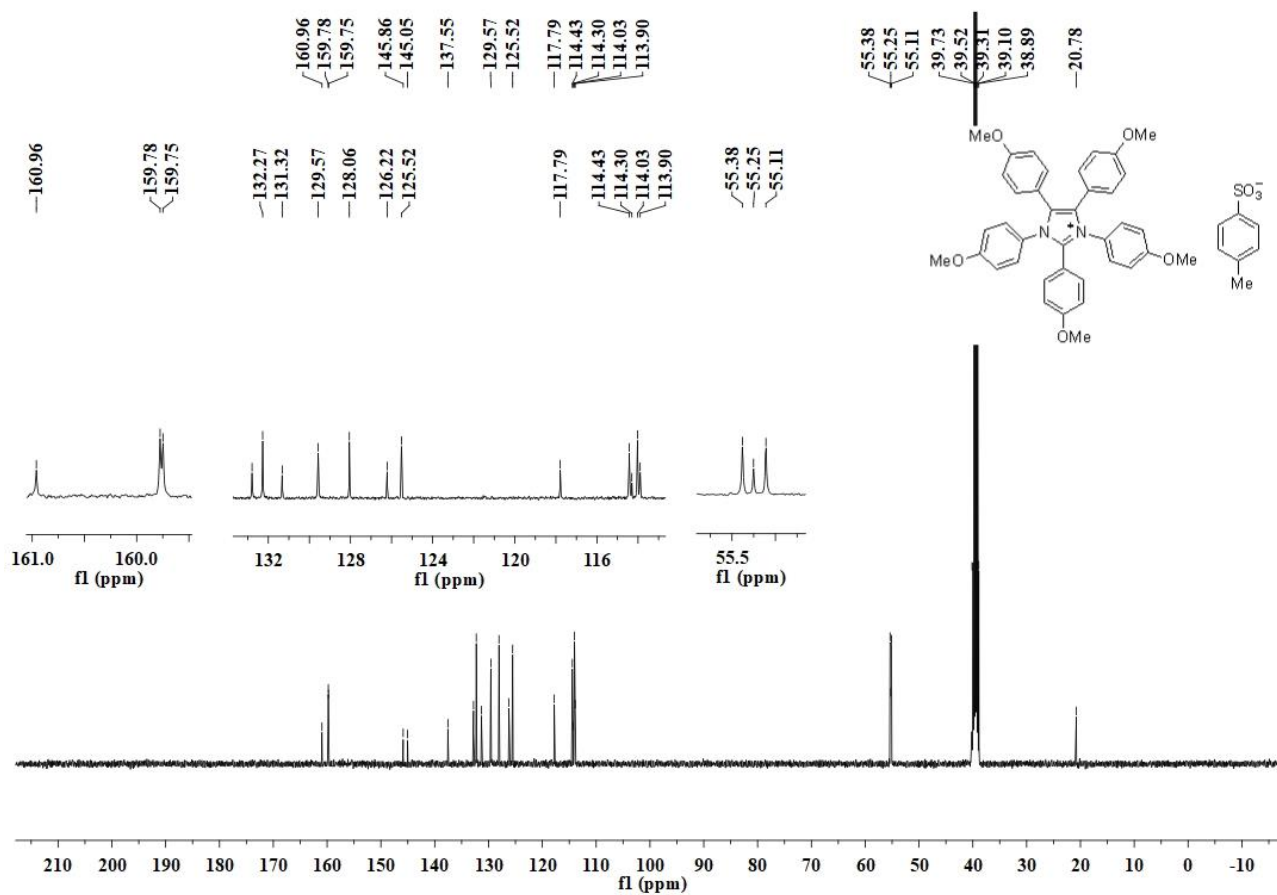



$^1\text{H}$  NMR (400 MHz, DMSO-*d*<sub>6</sub>) of **9**

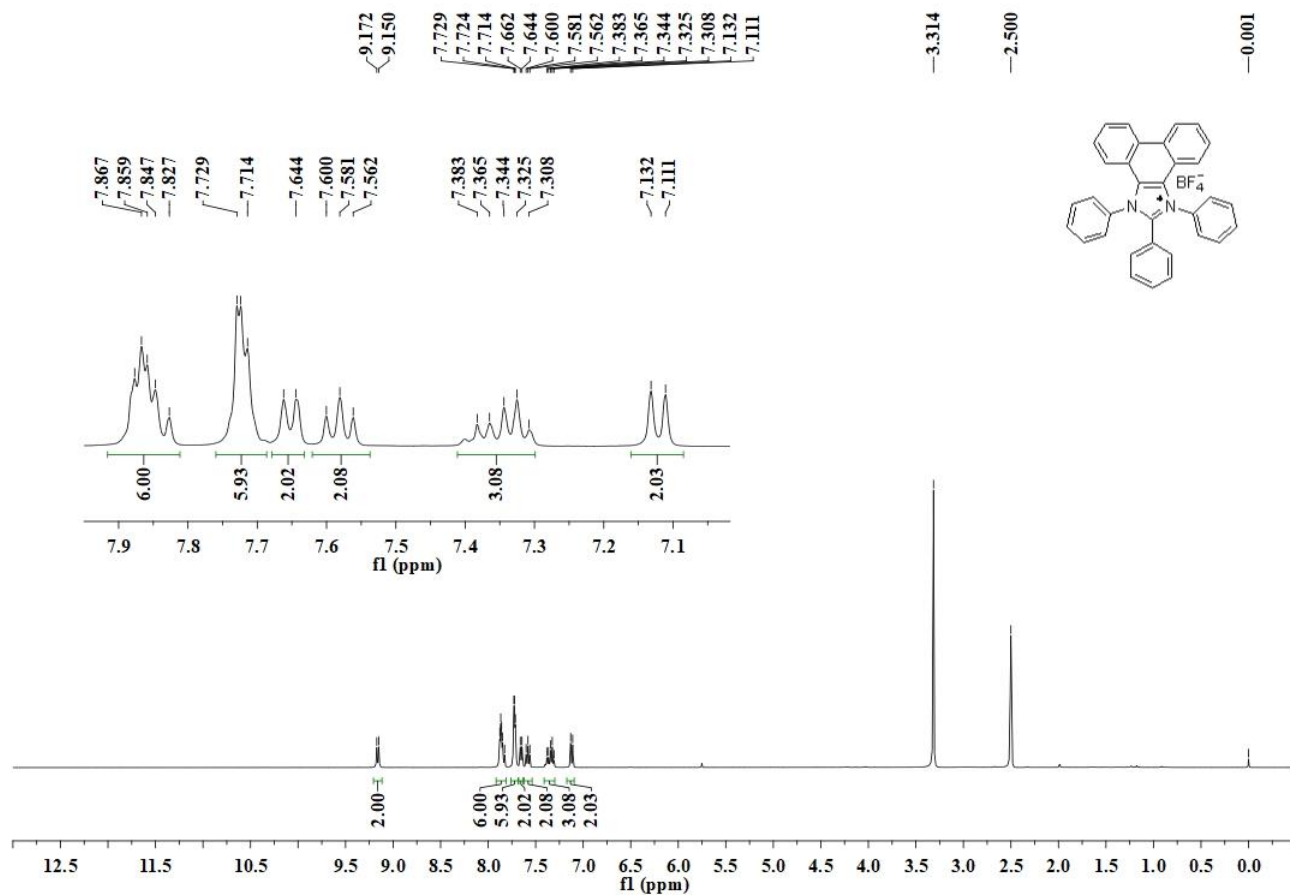

$^{13}\text{C}$  NMR (101 MHz, DMSO-*d*<sub>6</sub>) of **9**

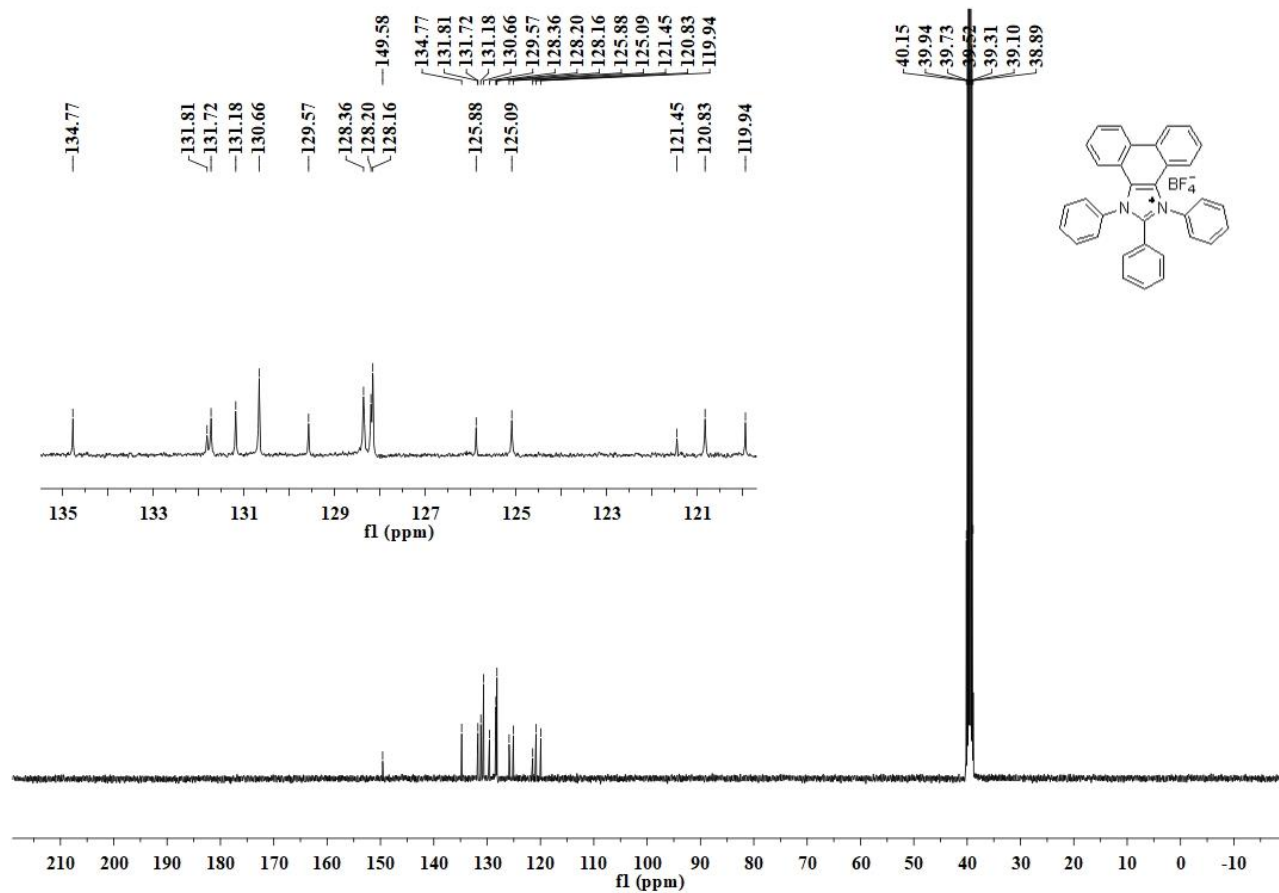

Supplement: c9cc05237b1.pdf [file c9cc05237b1.pdf]
